# Supplementary material
Source: PubMed Central journal article supplement (PMC2902991)

**A Chiral Azolium-Catalyzed, Enantioselective Claisen Rearrangement**

Juthanat Kaeobamrung, Jessada Mahatthananchai, Pinguan Zheng, and Jeffrey W. Bode\*

*Roy and Diana Vagelos Laboratories, Department of Chemistry,  
University of Pennsylvania, Philadelphia, PA 19104-6323, USA***Supporting Information****Table of Contents**

|                                                                                                       |     |
|-------------------------------------------------------------------------------------------------------|-----|
| General Methods.....                                                                                  | S02 |
| General Procedure for Enantioselective Annulation of Ynals and Kojic Acid Derivatives.....            | S03 |
| Preparations and Characterizations of Products <b>2–15</b> .....                                      | S04 |
| An azolium-catalyzed Claisen rearrangement via oxidation of $\alpha,\beta$ -unsaturated aldehyde..... | S17 |
| Relative Reactivity of <i>o,o</i> -Dichloro and <i>o,p</i> -Dichloro Phynylpropionaldehydes.....      | S18 |
| 1,2 Addition of <i>N</i> -Cbz Hydroxamic Acid to an Activated Carboxylate.....                        | S19 |
| Confirmation of Base Promoted Epimerization.....                                                      | S19 |
| Catalyst Counter Ions Comparison.....                                                                 | S20 |
| Experimental Rate Orders Measurements.....                                                            | S21 |
| Activation Parameters Analysis for Azolium-Catalyzed Claisen Rearrangement.....                       | S25 |
| Derivation of Rate Laws for Azolium-Catalyzed Claisen Rearrangement .....                             | S27 |
| Derivation of Rate Laws for Azolium-Catalyzed Conjugate Addition.....                                 | S30 |
| $^1\text{H}$ and $^{13}\text{C}$ NMR Spectra for Products <b>2–15</b> .....                           | S33 |

---

\* Corresponding author's current address: Laboratorium für Organische Chemie, ETH-Zürich, Wolfgang Pauli Strasse 10, CH-8093 Zürich, Switzerland.

**General methods.** All reactions utilizing air- or moisture-sensitive reagents were performed in dried glassware under an atmosphere of dry N<sub>2</sub>. Dichloromethane (CH<sub>2</sub>Cl<sub>2</sub>) was distilled over CaH<sub>2</sub>; EtOH was distilled over Na. THF and toluene were dried by passage over activated alumina under an Ar atmosphere. For all mechanistic investigations, the reactions were performed in deuterated toluene (distilled from sodium and benzophenone). The derivatives of ynals were synthesized according to literature procedure.<sup>1</sup> Other reagents were used without further purification. Thin layer chromatography (TLC) was performed on Merck precoated plates (silica gel 60 F<sub>254</sub>, Art 5715, 0.25 mm) and were visualized by fluorescence quenching under UV light or by staining with phosphomolybdic acid. Silica-gel preparative thin-layer chromatography (PTLC) was performed using plates prepared from Merck Kieselgel 60 PF<sub>254</sub> (Art 7747). Flash column chromatography was performed on E. Merck Silica Gel 60 (230–400 Mesh) using a forced flow of 0.5–1.0 bar. <sup>1</sup>H NMR and <sup>13</sup>C NMR were measured on Bruker Avance II 500 MHz, 125 MHz respectively. Chemical shifts are expressed in parts per million (ppm) downfield from residual solvent peaks, and coupling constants are reported in Hertz (Hz). Splitting patterns are indicated as follows: br, broad; s, singlet; d, doublet; dd, doublet of doublet; t, triplet; q, quartet; m, multiplet. The enolic proton of the products is not usually observed in the proton spectra. Infrared (IR) spectra were recorded on a JASCO FT:IR-4100 spectrophotometer and reported as wavenumber (cm<sup>-1</sup>). Optical rotations were measured on a JASCO P-1010 polarimeter operating at the sodium D line with a 100 mm path length cell, and were reported as follows: [α]<sub>D</sub><sup>T</sup> (concentration (g/100 ml), solvent).

**HPLC conditions.** Column, Daicel Chiralpak IA (4.6 × 250mm), Daicel Chiralpak IB (4.6 × 250 mm); Daicel Chiralpak ODH (4.6 × 250 mm); eluent: hexanes:*i*-PrOH; flow rate 1.0 mL/min; detection wavelength: 220 nm.

**SFC conditions.** Column, Daicel Chiralpak AS-H (4.6 × 250 mm), Daicel Chiralcel OJ-H (4.6 × 250 mm); eluent: CO<sub>2</sub>: *i*PrOH; oven temperature: 40 °C; outlet pressure 100 bar; flow rate 2.0 mL/min; detection wavelength: 220 nm.

---

(1) (a) Journet, M.; Cai, D.; Dimichele, L. M.; Larsen, R. D. *Tetrahedron Lett.* **1998**, 39(36), 6427–6428. (b) Serra, S.; Fuganti, C. *Synlett.* **2002**, 10, 1661–1664.

**General procedure for enantioselective annulation of ynals and kojic acid derivatives: 2-((*tert*-butyldimethylsilyloxy)methyl)-5-hydroxy-4h-pyran-4-one**

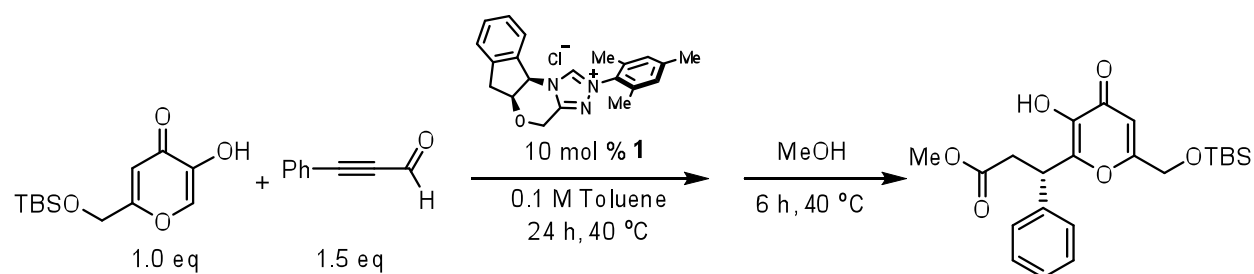

The reaction of 2-((*tert*-butyldimethylsilyloxy)methyl)-5-hydroxy-4H-pyran-4-one<sup>2</sup> and 3-phenylpropionaldehyde is representative. Into an oven dried 10.0 mL round bottom flask, 2-((*tert*-butyldimethylsilyloxy)methyl)-5-hydroxy-4H-pyran-4-one (102.5 mg, 0.40 mmol, 1.0 equiv) and (*S,R*) triazolium pre-catalyst (**1**)<sup>3</sup> (15.8 mg, 0.10 equiv) were added, followed by 4.0 mL toluene (0.1 M) and 3-phenylpropionaldehyde (78.0 mg, 0.60 mmol, 1.50 equiv). The flask was sealed with a polyethylene cap. The resulting solution was heated to 40 °C and stirred for 24 h before it was diluted with EtOAc and poured into sat aq NH<sub>4</sub>Cl solution. The mixture was extracted with 3 x 5.0 mL EtOAc. The combined organic extract was dried over Na<sub>2</sub>SO<sub>4</sub>. After filtration and concentration in vacuo, the residue was dissolved in 5.0 mL MeOH and stirred for 6 h. MeOH was removed, and the crude product was purified by flash chromatography (gradient, 0%–5% MeOH in dichlorometane) to give the product as a pale brown-yellow solid (133.3 mg, 80%).

Racemic standards of the chiral products were prepared by the use of 2-mesityl-6,7-dihydro-5H-pyrrolo[2,1-c][1,2,4]triazol-2-ium chloride (**19**)<sup>4</sup> as the catalyst. In most cases, this achiral catalyst was less efficient in terms of chemical yield than the chiral triazolium counterpart.

(2) Kamino, T.; Kuramochi, K.; Kobayashi, S. *Tetrahedron Lett.* **2003**, *44*, 7349–7351

(3) Both (*S,R*) chiral triazolium salt (**1**) and its (*R,S*) enantiomer are commercially available from Sigma-Aldrich (catalog number 683981 and 683973).

(4) (a) Sohn, S. S.; Bode, J. W. *Org. Lett.* **2005**, *7*, 3873–3876. (b) This achiral triazolium salt (**19**) is also commercially available from Sigma-Aldrich (catalog number 688487).

### Preparations and characterizations of products 2–14

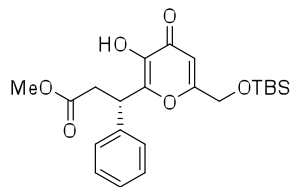

**(S)-methyl-3-(6-((*tert*-butyldimethylsilyloxy)methyl)-3-hydroxy-4-oxo-4H-pyran-2-yl)-3-phenylpropanoate** (Table 1, 2). Prepared according to the general procedure from 2-((*tert*-butyldimethylsilyloxy)methyl)-5-hydroxy-4H-pyran-4-one and 3-phenylpropionaldehyde using 10 mol % **1** as the catalyst in 80% yield as a pale yellow solid.  $[\alpha]_D^{20}$  (c 1.05, CHCl<sub>3</sub>): -14.26; <sup>1</sup>H NMR (500 MHz, CDCl<sub>3</sub>) δ 7.33–7.31 (m, 5H), 6.46 (s, 1H), 4.80–4.77 (m, 1H), 4.46 (s, 2H), 3.63 (s, 3H), 3.21 (dd, 1H, *J* = 9.0, 16.0 Hz), 3.02 (dd, 1H, *J* = 7.5, 16.0 Hz), 0.92 (s, 9H), 0.10 (s, 6H); <sup>13</sup>C NMR (125 MHz, CDCl<sub>3</sub>) δ 174.3, 171.4, 167.2, 149.6, 141.5, 139.4, 129.0, 128.8, 127.8, 127.6, 108.5, 61.6, 52.0, 40.8, 36.8, 29.8, 25.8, 18.3, -5.3; IR (thin film) ν 3254, 2929, 1740, 1629, 1453, 1254, 838, 700 cm<sup>-1</sup>; HRMS (ESI) [M+Na]<sup>+</sup> calcd. for C<sub>22</sub>H<sub>30</sub>O<sub>6</sub>Si, 441.1709 found, 441.1694; 97% ee as determined by HPLC (IB, 9:1 hexanes:*i*-PrOH), *t<sub>r</sub>* = 7.2 and 9.6 min. Ozonolysis<sup>5</sup> of **2**, followed by KOH saponification, afforded (*S*)-(+)-phenylsuccinic acid which was confirmed by <sup>1</sup>H and <sup>13</sup>C NMR comparison with literature values.<sup>6</sup> The absolute configuration of the experimentally obtained (*S*)-(+)-phenylsuccinic acid was confirmed by comparison with a commercial sample from Sigma-Aldrich. The measured optical rotation was recorded as  $[\alpha]_D^{20}$  (c = 0.20, acetone): +101.9, and Sigma-Aldrich reported  $[\alpha]_D^{20}$  (c = 1%, acetone): +171±4.

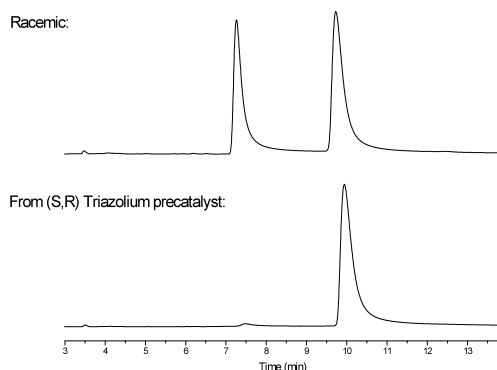

(5) Johnson, S. C.; Crasto, C.; Hecht, S. M. *Chem. Commun.* **1998**, 9, 1019–1020.

(6) Makosza, M.; Marcinowicz, A. *Synthesis.* **2001**, 9, 1311–1312.

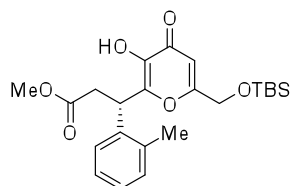

**(S)-methyl-3-(6-((*tert*-butyldimethylsilyloxy)methyl)-3-hydroxy-4-oxo-4H-pyran-2-yl)-3-o-tolylpropanoate** (Table 1, **3**). Prepared according to the general procedure from 2-((*tert*-butyldimethylsilyloxy)methyl)-5-hydroxy-4H-pyran-4-one and 3-*o*-tolylpropionaldehyde using 10 mol % **1** as the catalyst in 95% yield as a brown oil.  $[\alpha]_{\text{D}}^{20}$  (c 1.04,  $\text{CHCl}_3$ ):  $-2.59$ ;  $^1\text{H}$  NMR (500 MHz,  $\text{CDCl}_3$ )  $\delta$  7.30 (m, 1H), 7.16–7.15 (m, 3H), 6.46 (s, 1H), 5.04 (t, 1H,  $J = 8.5$  Hz), 4.45 (s, 2H), 3.62 (s, 3H), 3.17 (dd, 1H,  $J = 8.5, 16.0$  Hz), 2.98 (dd, 1H,  $J = 7.0, 16.0$  Hz), 2.47 (s, 3H), 0.92 (s, 9H), 0.10 (s, 6H);  $^{13}\text{C}$  NMR (125 MHz,  $\text{CDCl}_3$ )  $\delta$  174.3, 171.5, 167.3, 149.6, 141.5, 137.6, 136.6, 131.0, 127.4, 126.9, 126.5, 108.5, 61.6, 52.0, 37.1, 36.4, 25.9, 19.9, 18.3, -5.3; IR (thin film)  $\nu$  3249, 2953, 2857, 1741, 1630, 1255, 1165, 839, 781  $\text{cm}^{-1}$ ; HRMS (ESI)  $[\text{M}+\text{Na}]^+$  calcd. for  $\text{C}_{23}\text{H}_{32}\text{O}_6\text{Si}$ , 455.1866 found, 455.1866; 95% ee as determined by HPLC (IB, 9:1 hexanes:*i*-PrOH)  $t_r = 7.4$  and 10.0 min.

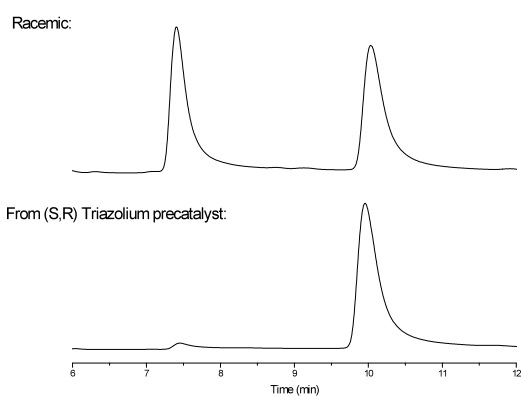

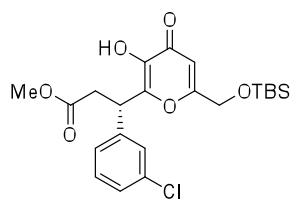

**(S)-methyl-3-(6-((*tert*-butyldimethylsilyloxy)methyl)-3-hydroxy-4-oxo-4H-pyran-2-yl)-3-(3-chlorophenyl)propanoate** (Table 1, 4). Prepared according to the general procedure from 2-((*tert*-butyldimethylsilyloxy)methyl)-5-hydroxy-4H-pyran-4-one and 3-(3-chlorophenyl)propionaldehyde using 10 mol % **1** as the catalyst in 87% yield as a white solid.  $[\alpha]_D^{20}$  (c 0.50, CHCl<sub>3</sub>): -19.23; <sup>1</sup>H NMR (500 MHz, CDCl<sub>3</sub>)  $\delta$  7.32 (s, 1H), 7.26–7.24 (m, 3H), 6.47 (s, 1H), 4.75 (t, 1H,  $J = 16.0$  Hz), 4.46 (s, 2H), 3.64 (s, 3H), 3.18 (dd, 1H,  $J = 8.5, 16.0$  Hz), 3.01 (dd, 1H,  $J = 7.5, 16.0$  Hz), 0.93 (s, 9H), 0.12 (s, 6H); <sup>13</sup>C NMR (125 MHz, CDCl<sub>3</sub>)  $\delta$  174.1, 171.2, 167.4, 148.4, 141.4, 141.3, 134.8, 130.3, 128.0, 127.9, 126.0, 108.3, 61.6, 52.2, 40.6, 36.5, 25.8, 18.3, -5.34; IR (thin film)  $\nu$  3261, 2928, 1735, 1624, 1587, 1254, 1233, 838, 781 cm<sup>-1</sup>; HRMS (ESI)  $[M+Na]^+$  calcd. for C<sub>22</sub>H<sub>29</sub>ClO<sub>6</sub>Si, 475.1320 found, 475.1313; 99% ee as determined by HPLC (IB, 9:1 hexanes:*i*-PrOH)  $t_r = 23.8$  and 39.4 min.

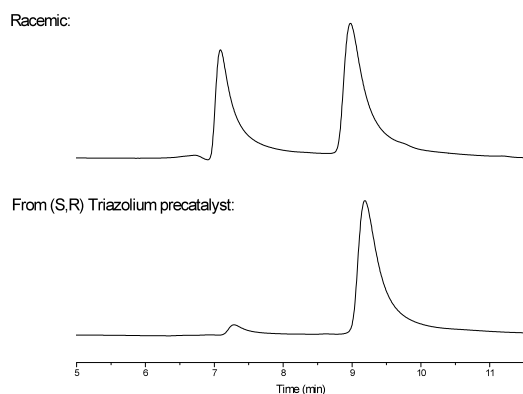

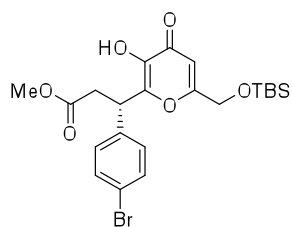

**(S)-methyl-3-(4-bromophenyl)-3-(6-((*tert*-butyldimethylsilyloxy)methyl)-3-hydroxy-4-oxo-4H-pyran-2-yl)propanoate** (Table 1, 5). Prepared according to the general procedure from 2-((*tert*-butyldimethylsilyloxy)methyl)-5-hydroxy-4H-pyran-4-one and 3-(4-bromophenyl)propionaldehyde using 10 mol % **1** as the catalyst in 82% yield as a pale yellow solid.  $[\alpha]_D^{20}$  (c 0.59, CHCl<sub>3</sub>): -27.8; <sup>1</sup>H NMR (500 MHz, CDCl<sub>3</sub>) δ 7.43 (d, 2H, *J* = 8.5 Hz), 7.22 (d, 2H, *J* = 8.5 Hz), 6.46 (s, 1H), 4.71–4.62 (m, 1H), 4.46 (s, 2H), 3.64 (s, 3H), 3.16 (dd, 1H, *J* = 8.5, 16.5 Hz), 3.00 (dd, 1H, *J* = 8.5, 16.5 Hz), 0.93 (s, 9H), 0.11 (s, 6H); <sup>13</sup>C NMR (125 MHz, CDCl<sub>3</sub>) δ 174.5, 174.2, 171.2, 168.6, 167.2, 149.0, 145.7, 141.4, 138.3, 137.4, 132.1, 130.8, 129.5, 129.3, 121.6, 109.1, 108.5, 61.6, 61.5, 52.1, 40.3, 36.5, 29.8, 25.9, 25.8, 18.4, 18.3; IR (thin film) ν 3248, 2953, 2928, 1741, 1630, 1254, 1164, 839, 780 cm<sup>-1</sup>; HRMS (ESI) [M+Na]<sup>+</sup> calcd. for C<sub>22</sub>H<sub>29</sub>BrO<sub>6</sub>Si, 519.0814 found, 519.0804; 92% ee as determined by HPLC (IB, 9:1 hexanes:*i*-PrOH) *t<sub>r</sub>* = 7.8 and 10.7 min.

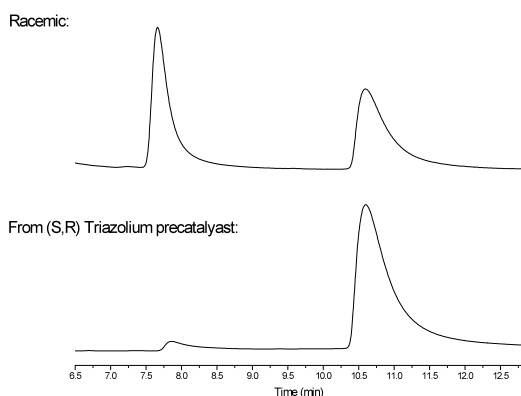

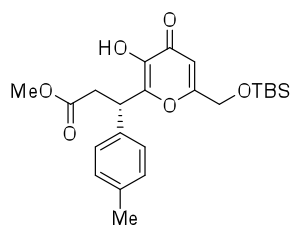

**(S)-methyl-3-(6-((*tert*-butyldimethylsilyloxy)methyl)-3-hydroxy-4-oxo-4H-pyran-2-yl)-3-p-tolylpropanoate** (Table 1, **6**). Prepared according to the general procedure from 2-((*tert*-butyldimethylsilyloxy)methyl)-5-hydroxy-4H-pyran-4-one and 3-*p*-tolylpropionaldehyde using 10 mol % **1** as the catalyst in 98% yield as a pale yellow solid.  $[\alpha]_D^{20}$  (c 1.42, CHCl<sub>3</sub>): -25.87; <sup>1</sup>H NMR (500 MHz, CDCl<sub>3</sub>) δ 7.23 (d, 2H, *J* = 8.0 Hz), 7.11 (d, 2H, *J* = 8.0 Hz), 6.47 (s, 1H), 4.78 (t, 1H, *J* = 8.0 Hz), 4.40 (s, 2H), 3.62 (s, 3H), 3.18 (dd, 1H, *J* = 8.5, 16.0 Hz), 3.00 (dd, 1H, *J* = 7.5, 16.0 Hz), 2.31 (s, 3H), 0.92 (s, 9H), 0.10 (s, 6H); <sup>13</sup>C NMR (125 MHz, CDCl<sub>3</sub>) δ 174.4, 171.5, 167.1, 150.0, 141.4, 137.3, 136.4, 129.6, 127.6, 108.5, 61.6, 52.0, 40.4, 38.9, 25.8, 21.2, 18.3, -5.3; IR (thin film)  $\nu$  cm<sup>-1</sup>; HRMS (ESI) [M+Na]<sup>+</sup> calcd. for C<sub>23</sub>H<sub>32</sub>O<sub>6</sub>Si, 455.1866 found, 455.1872; 98% ee as determined by HPLC (IB, 9:1 hexanes:*i*-PrOH) *t<sub>r</sub>* = 6.4 and 7.9 min.

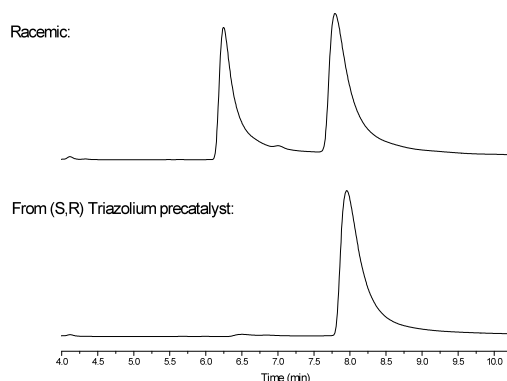



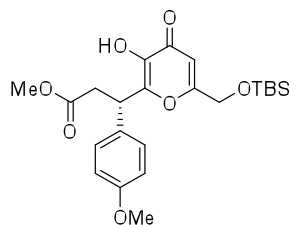

**(S)-methyl-3-(6-((*tert*-butyldimethylsilyloxy)methyl)-3-hydroxy-4-oxo-4H-pyran-2-yl)-3-(4-methoxyphenyl)propanoate** (Table 1, 7). Prepared according to the general procedure from 2-((*tert*-butyldimethylsilyloxy)methyl)-5-hydroxy-4H-pyran-4-one and 3-(4-methoxyphenyl)propionaldehyde using 10 mol % **1** as the catalyst in 88% yield as a yellow-brown solid.  $[\alpha]_D^{20}$  (c 1.10, CHCl<sub>3</sub>): -23.29; <sup>1</sup>H NMR (500 MHz, CDCl<sub>3</sub>)  $\delta$  7.26 (d, 2H,  $J$  = 8.5 Hz), 6.84 (d, 2H,  $J$  = 8.5 Hz), 6.46 (s, 1H), 4.74 (t, 1H,  $J$  = 8.0 Hz), 4.46 (s, 2H), 3.78 (s, 3H), 3.62 (s, 3H), 3.15 (dd, 1H,  $J$  = 8.5, 16.0 Hz), 2.99 (dd, 1H,  $J$  = 7.0, 16.0 Hz), 0.92 (s, 9H), 0.10 (s, 6H); <sup>13</sup>C NMR (125 MHz, CDCl<sub>3</sub>)  $\delta$  174.3, 171.5, 167.1, 159.0, 150.1, 141.2, 131.4, 128.8, 114.3, 108.5, 61.6, 55.3, 52.0, 40.0, 37.0, 25.8, 18.3, -5.3; IR (thin film)  $\nu$  3250, 2953, 2930, 1740, 1630, 1253, 838, 780 cm<sup>-1</sup>; HRMS (ESI)  $[M+Na]^+$  calcd. for C<sub>23</sub>H<sub>32</sub>O<sub>7</sub>Si, 471.1815 found, 471.1831; 96% ee as determined by HPLC (IB, 9:1 hexanes:*i*-PrOH)  $t_r$  = 6.8 and 8.8 min.

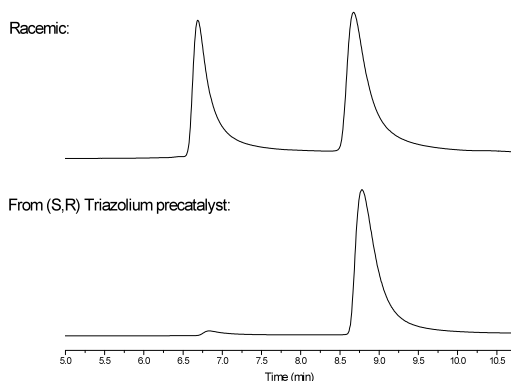

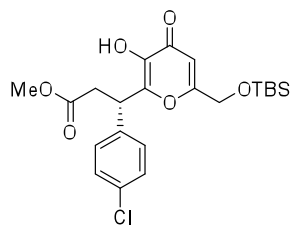

**(S)-methyl-3-(6-((*tert*-butyldimethylsilyloxy)methyl)-3-hydroxy-4-oxo-4H-pyran-2-yl)-3-(4-chlorophenyl)propanoate** (Table 1, 8). Prepared according to the general procedure from 2-((*tert*-butyldimethylsilyloxy)methyl)-5-hydroxy-4H-pyran-4-one and 3-(4-chlorophenyl)propiolaldehyde using 10 mol % **1** as the catalyst in 90% yield as a pale-brown yellow solid.  $[\alpha]_D^{20}$  (c 0.52, CHCl<sub>3</sub>): -28.6; <sup>1</sup>H NMR (500 MHz, CDCl<sub>3</sub>)  $\delta$  7.28–7.26 (m, 4H), 6.46 (s, 1H), 4.76 (t, 1H, *J* = 8.5 Hz), 4.45 (s, 2H), 3.63 (s, 3H), 3.17 (dd, 1H, *J* = 9.0, 16.5 Hz), 3.00 (dd, 1H, *J* = 8.0, 16.5 Hz), 0.92 (s, 9H), 0.10 (s, 6H); <sup>13</sup>C NMR (125 MHz, CDCl<sub>3</sub>)  $\delta$  174.4, 171.2, 167.1, 149.4, 141.5, 137.8, 133.5, 129.2, 129.1, 108.7, 61.5, 61.4, 58.4, 52.1, 40.1, 36.6, 25.8, 25.7, 18.4, 18.3, -5.3; IR (thin film)  $\nu$  3241, 2928, 2361, 1760, 1684, 1168, 1091, 779, 668 cm<sup>-1</sup>; HRMS (ESI) [M+Na]<sup>+</sup> calcd. for C<sub>22</sub>H<sub>29</sub>ClO<sub>6</sub>Si, 475.1320 found, 475.1316; 96% ee as determined by SFC (OJ-H, 15% *i*-PrOH in CO<sub>2</sub>) *t<sub>r</sub>* = 5.0 and 6.3 min..

Racemic:

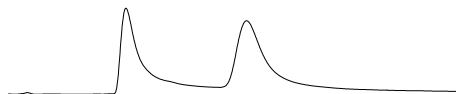

From (S,R) Triazolium precatalyst:

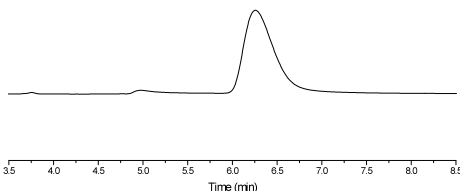

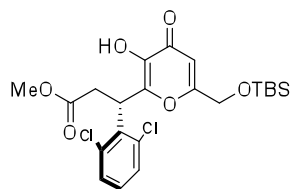

**(S)-methyl-3-(6-((*tert*-butyldimethylsilyloxy)methyl)-3-hydroxy-4-oxo-4H-pyran-2-yl)-3-(2,6-dichlorophenyl)propanoate** (Table 1, 9). Prepared according to the general procedure from 2-((*tert*-butyldimethylsilyloxy)methyl)-5-hydroxy-4H-pyran-4-one and 3-(2,6-dichlorophenyl)propionaldehyde using 10 mol % **1** as the catalyst in 95% yield as a dark-brown solid.  $[\alpha]_D^{20}$  (c 0.10,  $\text{CHCl}_3$ ): +109.3;  $^1\text{H}$  NMR (500 MHz,  $\text{CDCl}_3$ )  $\delta$  7.24 (s, 2H), 7.10 (s, 1H), 6.46 (s, 1H), 5.64–5.61 (m, 1H), 4.45 (d, 1H,  $J = 5.5$  Hz), 4.34 (d, 1H,  $J = 5.5$  Hz), 3.65 (s, 3H), 3.52–3.46 (m, 1H), 2.76–2.72 (m, 1H), 0.88 (s, 9H), 0.06 (s, 6H);  $^{13}\text{C}$  NMR (125 MHz,  $\text{CDCl}_3$ )  $\delta$  173.9, 171.4, 166.7, 147.0, 142.4, 134.9, 129.3, 129.1, 108.6, 61.4, 52.1, 38.3, 33.2, 25.8, 18.3, -5.4; IR (thin film)  $\nu$  2952, 1741, 1631, 1435, 1250, 838, 776  $\text{cm}^{-1}$ ; HRMS (ESI)  $[\text{M}+\text{Na}]^+$  calcd. for  $\text{C}_{22}\text{H}_{28}\text{Cl}_2\text{O}_6\text{Si}$ , 509.0930 found, 509.0955; 94% ee as determined by HPLC (IB, 9:1 hexanes:*i*-PrOH)  $t_r = 8.0$  and 12.8 min.

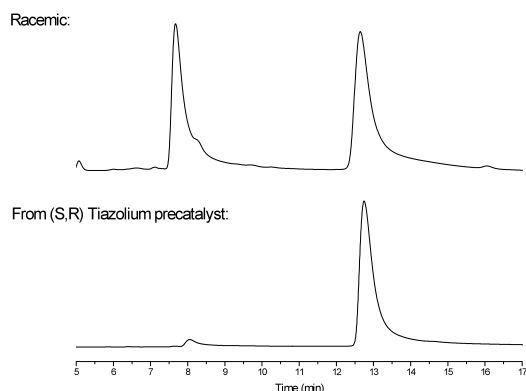

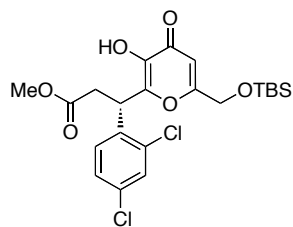

**(S)-methyl-3-(6-((*tert*-butyldimethylsilyloxy)methyl)-3-hydroxy-4-oxo-4H-pyran-2-yl)-3-(2,4-dichlorophenyl)propanoate** (Table 1, 10). Prepared according to the general procedure from 2-((*tert*-butyldimethylsilyloxy)methyl)-5-hydroxy-4H-pyran-4-one and 3-(2,4-dichlorophenyl)propionaldehyde<sup>7</sup> using 10 mol % **1** as the catalyst in 95% yield as a dark-brown solid.  $[\alpha]_{\text{D}}^{20}$  (c 0.94,  $\text{CHCl}_3$ ): +17.48;  $^1\text{H}$  NMR (500 MHz,  $\text{CDCl}_3$ )  $\delta$  7.41 (s, 1H), 7.28–7.25 (m, 1H), 7.22–7.20 (m, 1H), 6.49 (s, 1H), 5.18–5.15 (m, 1H), 4.44 (d, 2H,  $J = 2.5$  Hz), 3.65 (s, 3H), 3.19 (dd, 1H,  $J = 9.0, 16.5$  Hz), 2.97 (dd, 1H,  $J = 6.5, 16.5$  Hz), 0.91 (s, 9H), 0.10 (s, 6H);  $^{13}\text{C}$  NMR (125 MHz,  $\text{CDCl}_3$ )  $\delta$  174.2, 171.0, 167.5, 147.6, 142.1, 135.5, 134.6, 134.1, 129.9, 129.7, 127.7, 108.4, 61.5, 52.2, 38.0, 36.2, 25.8, 18.3, -5.4; IR (thin film)  $\nu$  3230, 2953, 2857, 1742, 1652, 1253, 861, 781  $\text{cm}^{-1}$ ; HRMS (ESI)  $[\text{M}+\text{Na}]^+$  calcd. for  $\text{C}_{22}\text{H}_{28}\text{Cl}_2\text{O}_6\text{Si}$ , 509.0930 found, 509.0955; 95% ee as determined by HPLC (ODH, 9:1 hexanes:*i*-PrOH)  $t_r = 6.5$  and 7.6 min.

Racemic:

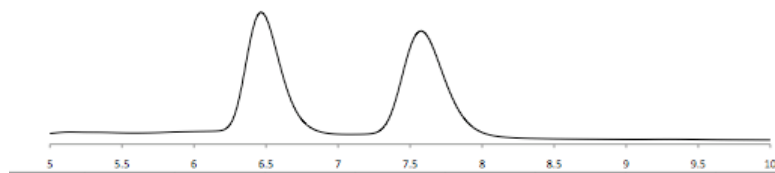

From (S,R) Triazolium precatalyst:

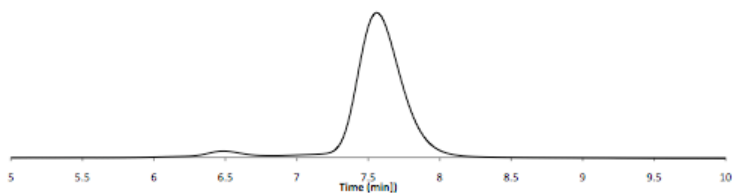

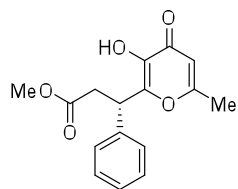

**(S)-methyl-3-(3-hydroxy-6-methyl-4-oxo-4H-pyran-2-yl)-3-phenylpropanoate** (Table 1, 11).

Prepared according to the general procedure from 5-hydroxy-2-methyl-4H-pyran-4-one<sup>7</sup> and 3-phenylpropionaldehyde using 10 mol % **1** as a catalyst in 90% yield as a pale yellow solid.  $[\alpha]_D^{20}$  (c 0.62, CHCl<sub>3</sub>): -38.22; <sup>1</sup>H NMR (500 MHz, CDCl<sub>3</sub>)  $\delta$  7.36–7.26 (m, 5H), 6.17 (s, 1H), 4.77 (t, 1H,  $J = 8.5$  Hz), 3.64 (s, 3H), 3.22 (dd, 1H,  $J = 9.0, 16.5$  Hz), 3.01 (dd, 1H,  $J = 7.0, 16.5$  Hz), 2.30 (s, 3H); <sup>13</sup>C NMR (125 MHz, CDCl<sub>3</sub>)  $\delta$  174.0, 171.5, 165.4, 149.5, 140.9, 139.5, 129.0, 127.7, 127.6, 110.5, 52.0, 40.8, 36.8, 20.2; IR (thin film)  $\nu$  3246, 2925, 1738, 1621, 1436, 1211, 733, 701 cm<sup>-1</sup>; HRMS (ESI)  $[M+Na]^+$  calcd. for C<sub>16</sub>H<sub>16</sub>O<sub>5</sub>, 311.0895 found, 311.0901; 99% ee as determined by SFC (ASH, gradient 5%–80% *i*-PrOH in CO<sub>2</sub>, rate 10%/min)  $t_r = 4.3$  and 5.3 min.

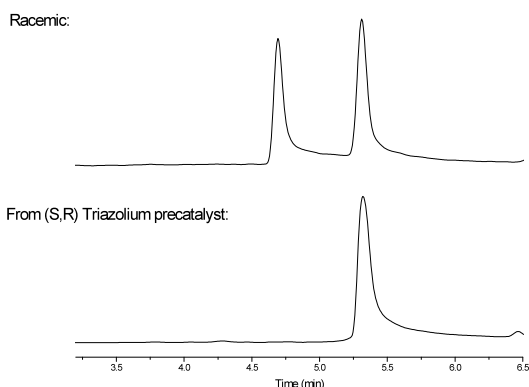

<sup>(9)</sup> Öztürk, G.; Erol, D. D.; Aytimir, M. D.; Uzbay, T. *Eur. J. Med. Chem.* **2002**, *37*, 829–834

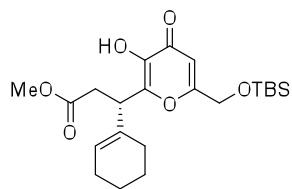

**(S)-methyl-3-(6-((*tert*-butyldimethylsilyloxy)methyl)-3-hydroxy-4-oxo-4H-pyran-2-yl)-3-cyclohexenylpropanoate** (Table 1, 12). Prepared according to the general procedure from 2-((*tert*-butyldimethylsilyloxy)methyl)-5-hydroxy-4H-pyran-4-one and 3-cyclohexenyl propionaldehyde using 10 mol % **1** as the catalyst in 98% yield as a pale brown solid.  $[\alpha]_D^{20}$  (c 1.10, CHCl<sub>3</sub>): -22.76; <sup>1</sup>H NMR (500 MHz, CDCl<sub>3</sub>) δ 6.47 (s, 1H), 5.61 (s, 1H), 4.46 (s, 2H), 4.05 (t, 1H, *J* = 7.5 Hz), 3.64 (s, 3H), 2.88 (dd, 1H, *J* = 9.0, 16.0 Hz), 2.79 (dd, 1H, *J* = 7.0, 16.0 Hz), 2.00–1.95 (m, 4H), 1.61–1.57 (m, 4H), 0.93 (s, 9H), 0.12 (s, 6H); <sup>13</sup>C NMR (125 MHz, CDCl<sub>3</sub>) δ 174.2, 172.0, 167.0, 150.0, 142.0, 135.1, 124.4, 108.4, 61.6, 51.9, 42.2, 34.8, 27.1, 25.8, 25.4, 22.8, 22.2, 18.3, -5.4; IR (thin film) ν 3263, 2929, 1729, 1627, 1252, 1164, 839, 781 cm<sup>-1</sup>; HRMS (ESI) [M+Na]<sup>+</sup> calcd. for C<sub>22</sub>H<sub>34</sub>O<sub>6</sub>Si, 445.2022 found, 445.1968; 97% ee as determined by HPLC (IB, 20:1 hexanes:*i*-PrOH) *t<sub>r</sub>* = 8.4 and 10.2 min.

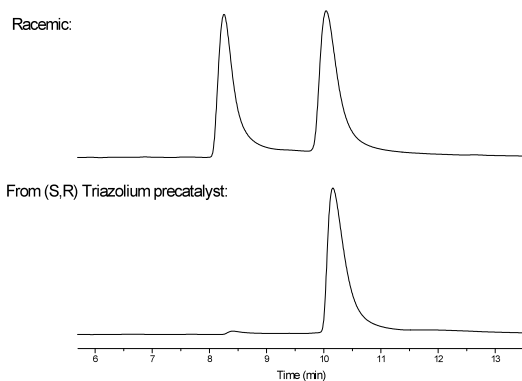

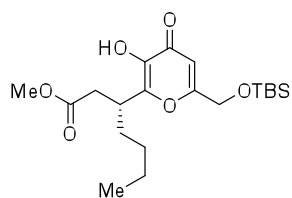

**(R)-methyl-3-(6-((*tert*-butyldimethylsilyloxy)methyl)-3-hydroxy-4-oxo-4H-pyran-2-yl)heptanoate** (Table 1, **13**). Prepared according to the general procedure from 2-((*tert*-butyldimethylsilyloxy)methyl)-5-hydroxy-4H-pyran-4-one and hept-2-ynal using 10 mol % **1** as the catalyst in 78% yield as pale yellow solid.  $[\alpha]_D^{20}$  (c 0.28, CHCl<sub>3</sub>): -11.70; <sup>1</sup>H NMR (500 MHz, CDCl<sub>3</sub>) δ 6.49 (s, 1H), 4.50 (s, 2H), 3.66 (s, 3H), 3.51–3.47 (m, 1H), 2.71 (dd, 1H, *J* = 8.0, 15.5 Hz), 2.60 (dd, 1H, *J* = 6.5, 15.5 Hz), 1.72–1.67 (m, 3H), 1.64–1.59 (m, 6H), 0.93 (s, 9H), 0.11 (s, 6H); <sup>13</sup>C NMR (125 MHz, CDCl<sub>3</sub>) δ 174.1, 172.1, 167.2, 151.2, 142.1, 108.4, 61.6, 51.9, 37.0, 35.5, 32.1, 29.3, 25.8, 22.5, 18.3, 14.0, -5.3; IR (thin film)  $\nu$  cm<sup>-1</sup>; HRMS (ESI) [M+H]<sup>+</sup> calcd. for C<sub>20</sub>H<sub>34</sub>O<sub>6</sub>Si, 399.2203 found, 399.2206; >99% ee as determined by HPLC (IA, 100:1 hexanes:*i*-PrOH) *t<sub>r</sub>* = 35.0 and 38.5 min.

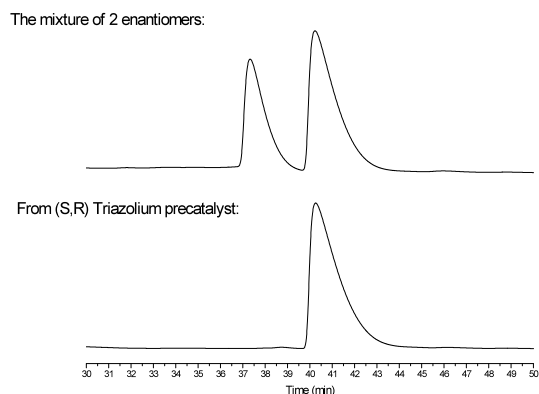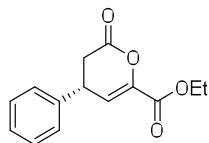

**(R)-ethyl-2-oxo-4-phenyl-3,4-dihydro-2H-pyran-6-carboxylate** (Scheme 2, **14**). Prepared according to the general procedure from ethyl pyruvate and 3-phenylpropionaldehyde (The

aldehyde was added 2 portions: 1.5 equiv, and after 12 h, another 1.0 equiv) using 10 mol % **1** as catalyst and 20 mol %  $^1\text{Pr}_2\text{NEt}$  as a base in 74% yield as a pale yellow oil.  $[\alpha]_{\text{D}}^{20}$  (c 0.35,  $\text{CHCl}_3$ ): +120.0;  $^1\text{H}$  NMR (500 MHz,  $\text{CDCl}_3$ )  $\delta$  7.38–7.35 (m, 2H), 7.32–7.31 (m, 1H), 7.20–7.18 (m, 2H), 6.64 (d, 1H,  $J = 4.5$  Hz), 4.35–4.31 (m, 2H), 3.96–3.92 (m, 1H), 2.98 (dd, 1H,  $J = 7.0, 16.0$  Hz), 2.76 (dd, 1H,  $J = 8.5, 16.0$  Hz), 1.35 (t, 3H,  $J = 7.0$  Hz);  $^{13}\text{C}$  NMR (125 MHz,  $\text{CDCl}_3$ )  $\delta$  166.0, 160.5, 143.0, 140.0, 129.4, 128.1, 127.0, 117.9, 62.1, 37.3, 35.9, 14.3; IR (thin film)  $\nu$  2882, 1779, 1734, 1208, 1102, 760, 700  $\text{cm}^{-1}$ ; HRMS (ESI)  $[\text{M}+\text{Na}]^+$  calcd. for  $\text{C}_{14}\text{H}_{14}\text{O}_4$ , 269.0790 found, 269.0789; 99% ee as determined by HPLC (IB, 30:1 hexanes:*i*-PrOH)  $t_r = 40.6$  and 42.8 min.

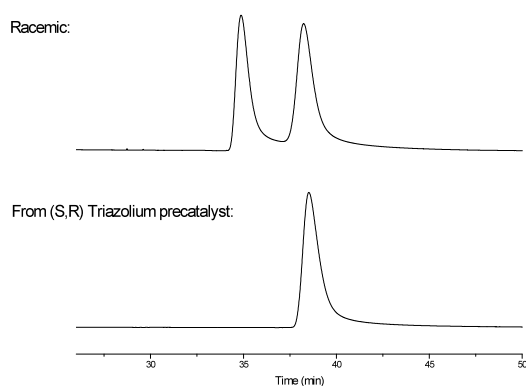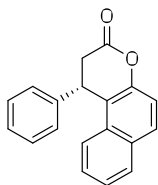

**(S)-1-phenyl-1H-benzo[f]chromen-3(2H)-one** (Scheme 2, **15**). Prepared according to the general procedure from 2-naphthol and 3-phenylpropionaldehyde using 10 mol % **1** as a catalyst in 79% yield as a yellow solid.  $[\alpha]_{\text{D}}^{20}$  (c 0.60,  $\text{CHCl}_3$ ): +57.34;  $^1\text{H}$  NMR (500 MHz,  $\text{CDCl}_3$ )  $\delta$  7.88–7.86 (m, 2H), 7.80 (d, 1H,  $J = 8.5$  Hz), 7.49–7.45 (m, 2H), 7.43 (d, 1H,  $J = 7.0$  Hz), 7.28–7.25 (m, 2H), 7.23–7.20 (m, 1H), 7.13 (d, 2H,  $J = 7.5$  Hz), 4.96 (d, 1H,  $J = 6.5$  Hz), 3.25–3.14 (m, 2H);  $^{13}\text{C}$  NMR (125 MHz,  $\text{CDCl}_3$ )  $\delta$  167.2, 150.0, 140.7, 131.2, 131.1, 130.1, 129.4, 128.9,



127.7, 127.6, 127.1, 125.4, 123.2, 117.7, 37.8, 37.6; IR (thin film)  $\nu$  3061, 1781, 1515, 1209, 1135, 816, 789  $\text{cm}^{-1}$ ; HRMS (ESI)  $[M+Na]^+$  calcd. for  $\text{C}_{19}\text{H}_{14}\text{O}_2$ , 297.0891 found, 297.0905; 68% ee as determined by SFC (ASH, gradient 10%–80% *i*-PrOH in  $\text{CO}_2$ , rate 5%/min)  $t_r$  = 7.4 and 8.2 min.

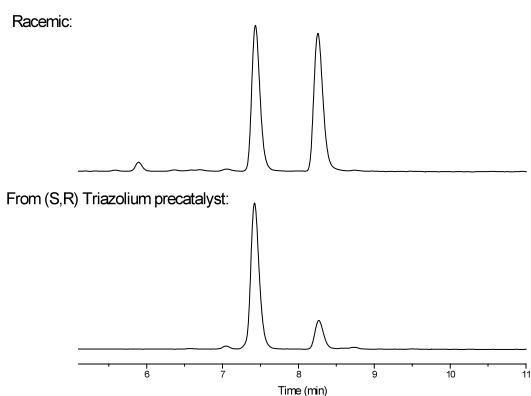

### An azolium-catalyzed Claisen rearrangement via oxidation of $\alpha,\beta$ -unsaturated aldehyde

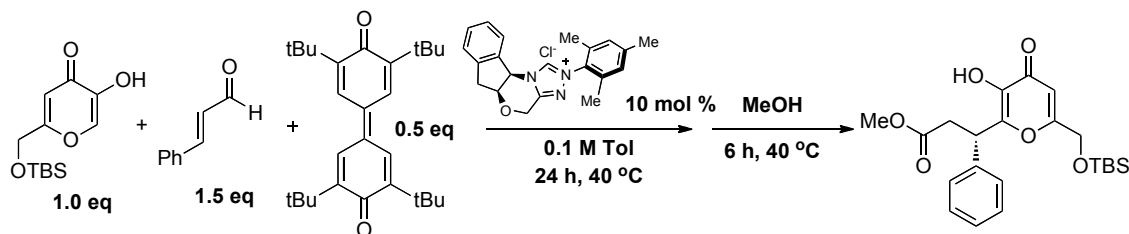

**(S)-methyl-3-(6-((*tert*-butyldimethylsilyloxy)methyl)-3-hydroxy-4-oxo-4H-pyran-2-yl)-3-phenylpropanoate** (Table 1, 2). As an alternative method, inspired by the work of Studer<sup>8</sup>, 2-((*tert*-butyldimethylsilyloxy)methyl)-5-hydroxy-4H-pyran-4-one (25.6 mg, 0.1 mmol, 1 equiv), cinnamaldehyde (19.8 mg, 0.15 mmol, 1.5 equiv), 3,3',5,5'-tetra-*tert*-butyl-[1,1'-bi(cyclohexylidene)]-2,2',5,5'-tetraene-4,4'-dione (20.4 mg, 0.05 mmol, 0.5 equiv an an oxidant), and **1** (10 mol% as the catalyst) were combined and diluted in toluene (0.1 M) at 40°C overnight. Ring opening of the reaction with MeOH (6 hours at 40°C) afforded product **2**: 66% conversion (based on <sup>1</sup>H NMR relative to the starting materials) and 97% ee.

(8) De Sarkar, S.; Grimme, S.; Studer, A. *J. Am. Chem. Soc.* **2010**, *132*, 1190–1191.

Relative reactivity of *o,o*-dichloro and *o,p*-dichloro phenylpropiolaldehyde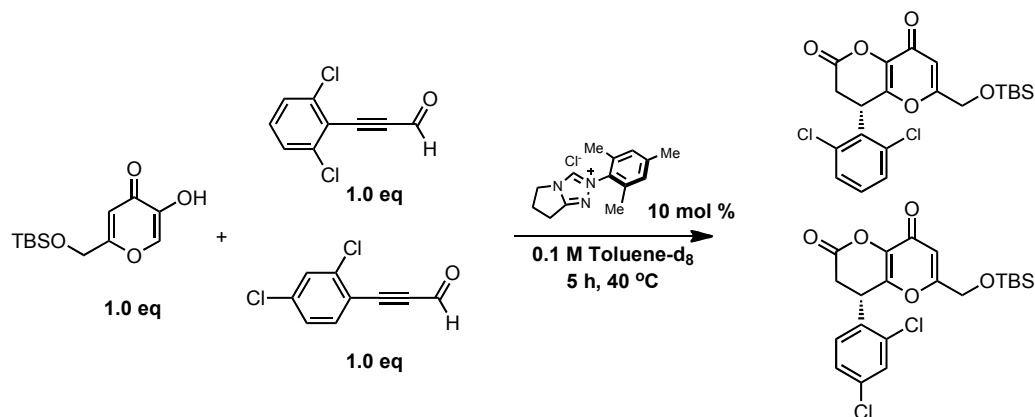

In a dried 10.0 mL NMR tube, 3-(2,4-dichlorophenyl)propiolaldehyde (10.0 mg, 0.05 mmol, 1.0 equiv), 3-(2,6-dichlorophenyl)propiolaldehyde (10.0 mg, 0.05 mmol, 1.0 equiv) and 2-((*tert*-butyldimethylsilyloxy)methyl)-5-hydroxy-4H-pyran-4-one (13.0 mg, 0.05 mmol, 1.0 equiv) were mixed with 10 mol% of catalyst **18** in  $C_6D_6CD_3$  (0.50 mL). The reaction mixture was monitored by  $^1H$  NMR. After 5 hours, the ratio of products was determined from  $^1H$  NMR spectra (below) to be 1.25 (*o,p*-dichloro) to 1.00 (*o,o*-dichloro) products.

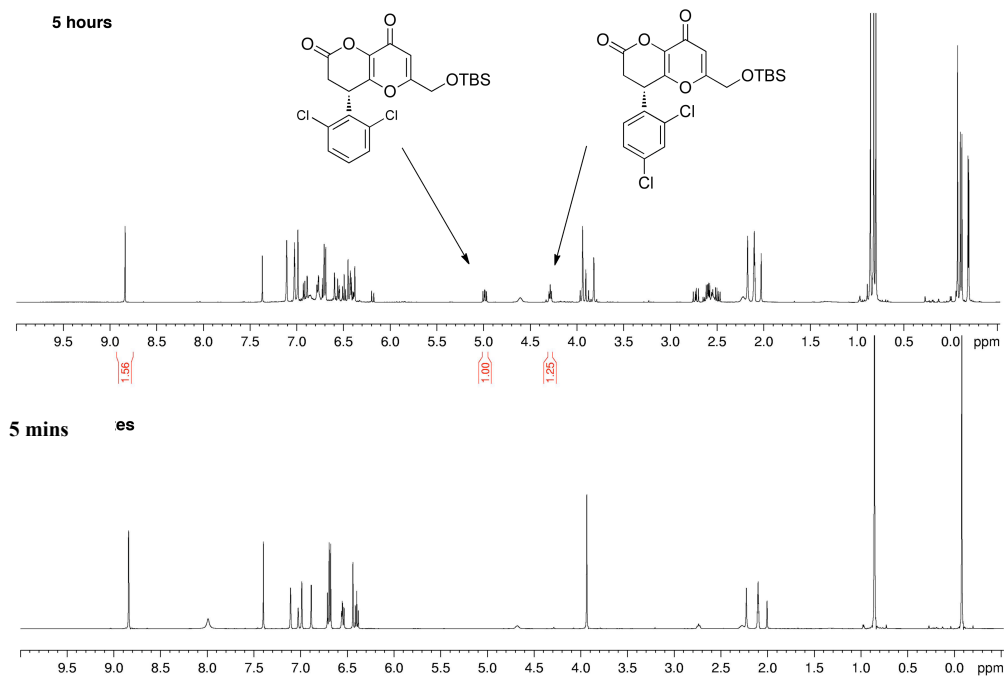

### 1,2 Addition of *N*-Cbz hydroxamic acid

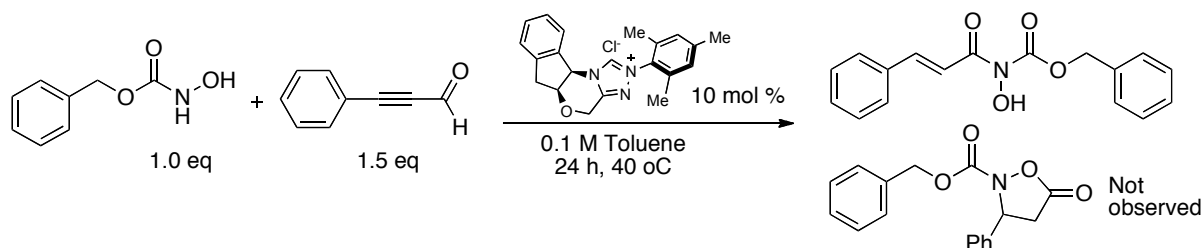

Prepared according to the general procedure from *N*-Cbz hydroxamic acid and 3-phenylpropionaldehyde using 10 mol % of **1** as the catalyst to afford the product **20** in 53% yield as a yellow solid.  $^1\text{H}$  NMR (500 MHz,  $\text{CDCl}_3$ )  $\delta$  8.36 (s, 1H), 7.86 (d, 1H,  $J = 16.0$  Hz), 7.55–7.54 (m, 2H), 7.44–7.34 (m, 8H), 6.53 (d, 1H,  $J = 16.0$  Hz), 5.25 (s, 2H);  $^{13}\text{C}$  NMR (125 MHz,  $\text{CDCl}_3$ )  $\delta$  166.2, 156.5, 148.3, 135.2, 133.8, 131.3, 129.2, 128.8, 128.8, 128.6, 128.5, 113.3, 68.5; IR (thin film)  $\nu$  3266, 1746, 1633, 1450, 1219, 1118, 766, 697  $\text{cm}^{-1}$ ; HRMS (ESI)  $[\text{M}+\text{Na}]^+$  calcd. for  $\text{C}_{17}\text{H}_{15}\text{NO}_4$ , 320.0899 found, 320.0861.

### Epimerization by an addition of base experiment

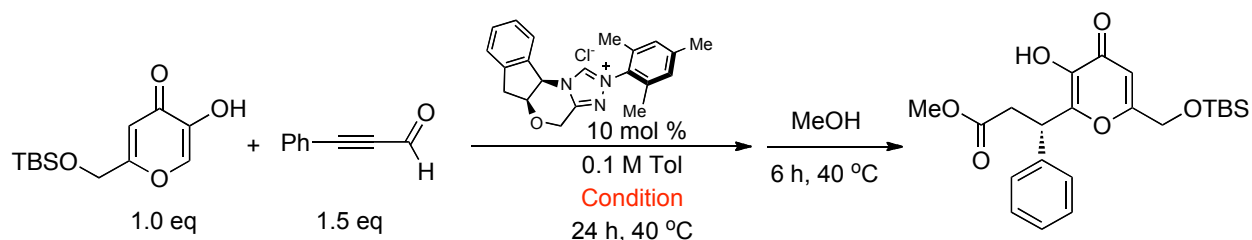

Prepared according to the general procedure, except that *N*-methylmorpholine (NMM) (20 mol %) was added as a base. The crude product mixture was purified by preparative TLC (3:1 hexanes:EtOAc) to give **2** (48% ee as determined by HPLC (IB, 9:1 hexanes:*i*-PrOH),  $t_r = 7.2$  and 9.6 min. Alternatively, base-induced epimerization of the final adduct could be confirmed by stirring high-enantiomeric excess product in a weak amine base (see table below).

| Reaction condition                                                                    | % ee of the final adduct (from chiral HPLC) |
|---------------------------------------------------------------------------------------|---------------------------------------------|
| No base                                                                               | 97%                                         |
| 20% AcOH added at $t = 0$                                                             | 47%                                         |
| 20% NMM added at $t = 0$                                                              | 48%                                         |
| 20% NMM added at $t = 2$ hours                                                        | 14%                                         |
| 20% NMM added at $t = 24$ hours<br>(after the reaction completed by $^1\text{H}$ NMR) | 74%                                         |

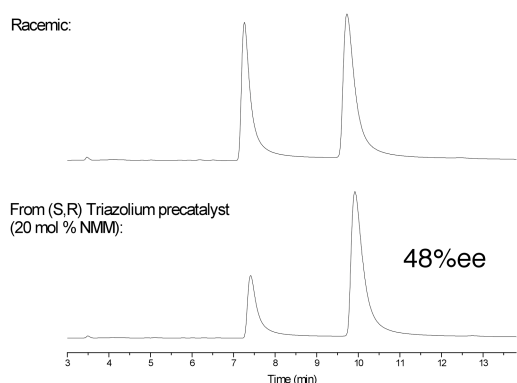

### Catalyst counter ions comparison

Preparation: The counter ions exchanges between 2-mesityl-6,7-dihydro-5H-pyrrolo[2,1-c][1,2,4]triazol-2-ium chloride (**1**) and various silver salts ( $\text{AgOAc}$ ,  $\text{AgClO}_4$ ,  $\text{AgSbF}_6$ ,  $\text{AgOCOCF}_3$ ) were performed according to a literature procedure.<sup>9</sup>

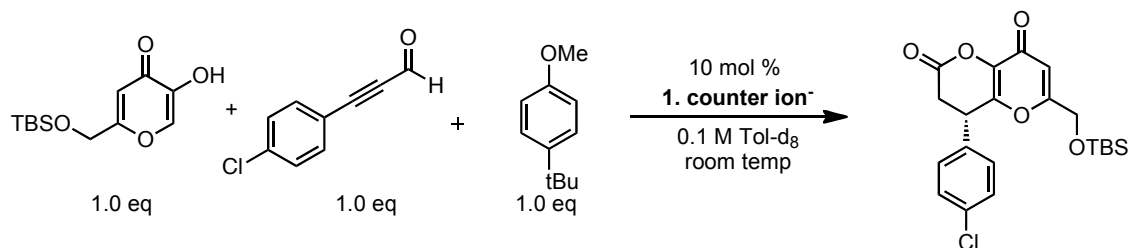

Comparison Experiment: A solution of 2-((*tert*-butyldimethylsilyloxy)methyl)-5-hydroxy-4H-pyran-4-one (1.0 equiv), 3-(4-chlorophenyl)propionaldehyde (1.0 equiv), and 1-(*tert*-butyl)-4-methoxybenzene (1.0 equiv as internal standard) was prepared using deuterated toluene (with 10% deuterated dichloromethane to ensure complete solubility) and mixed with the pre-catalyst with different counter ions ( $X$ , 0.1 equiv):  $\text{Cl}^-$ ,  $\text{OAc}^-$ ,  $\text{ClO}_4^-$ ,  $\text{CF}_3\text{CO}_2^-$ , and  $\text{SbF}_6^-$ . A control reaction was done using the same solution and the pre-catalyst with  $\text{SbF}_6^-$  and 20% *N*-methylmorpholine (NMM). The reactions were performed in dried NMR tubes at room temperature. Percentage conversions were measured using  $^1\text{H}$  NMR by the disappearance of the ynal, from the integration of the peak at 8.90 ppm (1H) against the internal standard peak at 1.22 ppm (9H). The conversion of the ynal was found to be influenced by the counter ion with the

(9) Kim, J.H.; Jo, K.A.; Son, Y.H.; Park, S.R.; Ahn, K-H.; Kang, E.J. *Bull. Korean Chem. Soc.* **2009**, *30*, 2464-2466.

following trend:  $\text{OAc}^- > \text{SbF}_6^-$  with NMM  $> \text{Cl}^- > \text{CF}_3\text{CO}_2^- > \text{ClO}_4^-$  (trace)  $> \text{SbF}_6^-$  (no reaction). The table below compares percent conversions (% conv.) at 1.0, 2.5, and 12 hours.

#### Effect of azolium counterion on conversion.

| X (counter ion)                     | % conv. 1 h | % conv. 2.5 h | % conv. 12 h |
|-------------------------------------|-------------|---------------|--------------|
| $\text{Cl}^-$                       | 10          | 16            | 70           |
| $\text{OAc}^-$                      | 100         | na            | na           |
| $\text{CF}_3\text{CO}_2^-$          | 7           | 10            | 20           |
| $\text{ClO}_4^-$                    | 0           | 0             | trace        |
| $\text{SbF}_6^-$                    | 0           | 0             | 0            |
| $\text{SbF}_6^- + \text{NMM}$ (30%) | 30          | 35            | 86           |

<sup>a</sup>Determined by  $^1\text{H}$  NMR analysis against an internal standard.

#### Experimental rate orders measurements

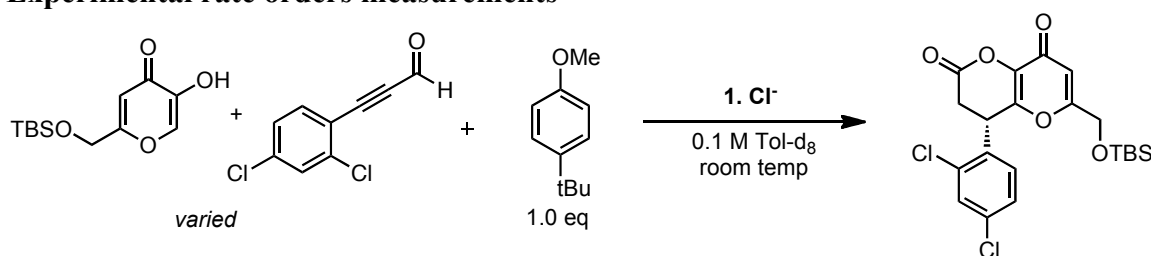

**Rate order for aldehyde:** A solution of 2-((*tert*-butyldimethylsilyloxy)methyl)-5-hydroxy-4H-pyran-4-one (1.0 equiv) and 1-(*tert*-butyl)-4-methoxybenzene (1.0 equiv as internal standard) was prepared using deuterated toluene (with 10% deuterated dichloromethane to ensure complete solubility) and degassed. Then, 2-mesityl-6,7-dihydro-5H-pyrrolo[2,1-*c*][1,2,4]triazol-2-ium chloride (0.1 equiv) was added to the solution, and the final solution was transferred to dried NMR tubes containing varied amounts of 3-(2,4-dichlorophenyl) propionaldehyde: 0.50, 0.75, 1.00, 1.25, and 1.50 equiv. The reactions were performed at room temperature; percentage conversions were measured using  $^1\text{H}$  NMR by the disappearance of the ynal from the integration of the peak at 8.85 ppm (1H) against the internal standard peak at 1.22 ppm (9H). The plots of molar concentration of the ynal versus time (hour) were generated; the rates were determined from the slope of each plot.<sup>10</sup> The rate order was calculated from the plot of  $\ln(\text{rate})$  against  $\ln(\text{aldehyde concentration})$  to be 0.55 ( $R^2 = 0.90$ ). Below, the table reports raw data; the plots shows [aldehyde] vs. time, and the  $\ln[\text{rate}]$  vs.  $\ln[\text{aldehyde}]$ .

(10) As a verification of the method validity, the plot of molar concentration of the product versus time (hour) was performed additionally. Percentage deviations of the rates were calculated to be  $<3.00\%$  for three cases: *para* methyl, no substitution, and *para* chloro ynals.

| time (h)             | Aldehyde concentration for the reactions (varying aldehyde equiv). |                                          |                                          |                                          |                                          |
|----------------------|--------------------------------------------------------------------|------------------------------------------|------------------------------------------|------------------------------------------|------------------------------------------|
|                      | 1.50 equiv.                                                        | 1.25 equiv.                              | 1.00 equiv.                              | 0.75 equiv.                              | 0.50 equiv.                              |
| 0.00                 | 0.1430                                                             | 0.1150                                   | 0.0970                                   | 0.0650                                   | 0.0480                                   |
| 1.00                 | 0.1320                                                             | 0.1050                                   | 0.0890                                   | 0.0590                                   | 0.0420                                   |
| 2.00                 | 0.1280                                                             | 0.0990                                   | 0.0850                                   | 0.0550                                   | 0.0370                                   |
| 3.00                 | 0.1210                                                             | 0.0920                                   | 0.0760                                   | 0.0500                                   | 0.0330                                   |
| 4.00                 | 0.1060                                                             | 0.0820                                   | 0.0650                                   | 0.0430                                   | 0.0280                                   |
| <b>Rate [M/h]</b>    | <b><math>-8.50 \times 10^{-3}</math></b>                           | <b><math>-7.90 \times 10^{-3}</math></b> | <b><math>-7.70 \times 10^{-3}</math></b> | <b><math>-5.30 \times 10^{-3}</math></b> | <b><math>-4.90 \times 10^{-3}</math></b> |
| <b>R<sup>2</sup></b> | <b>0.98</b>                                                        | <b>1.00</b>                              | <b>0.99</b>                              | <b>1.00</b>                              | <b>1.00</b>                              |

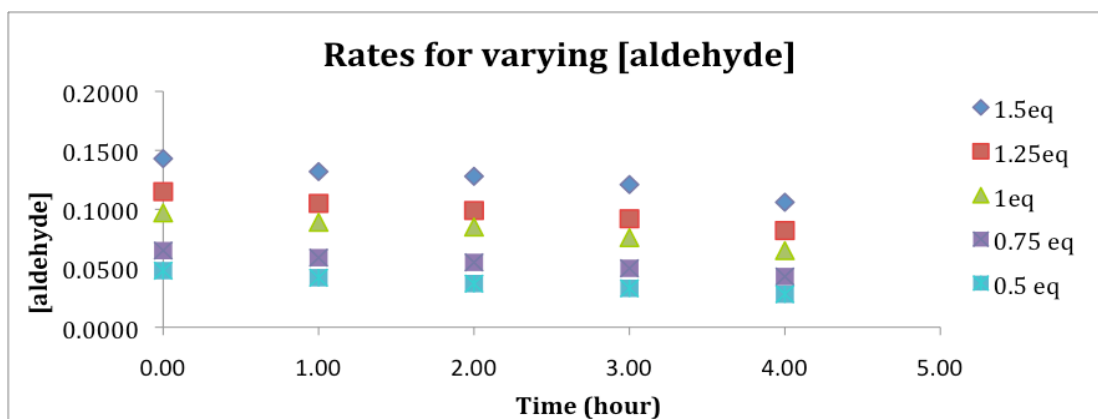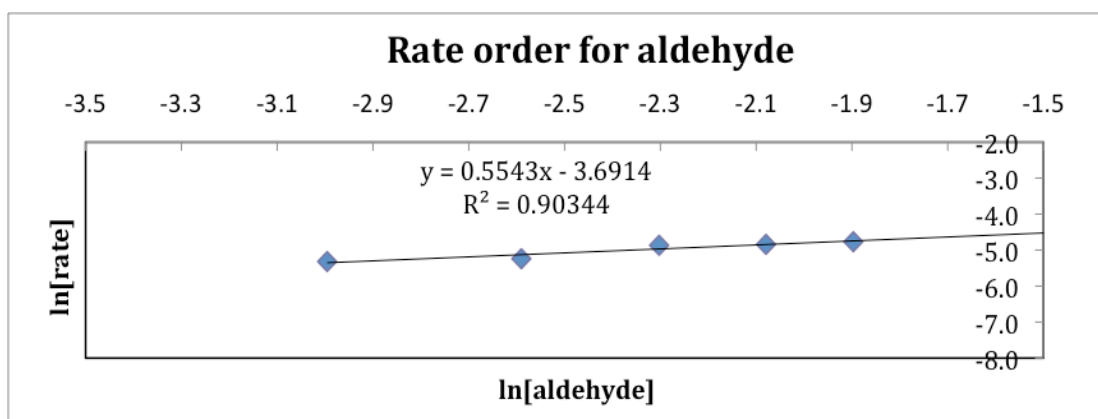

*Rate order for the catalyst:* A solution of 2-((*tert*-butyldimethylsilyloxy)methyl)-5-hydroxy-4H-pyran-4-one (1.0 equiv), 3-(2,4-dichlorophenyl) propionaldehyde (1.0 equiv), and 1-(*tert*-butyl)-4-methoxybenzene (1.0 equiv as internal standard) was prepared using deuterated toluene (with 10% deuterated dichloromethane) and degassed. Then the solution was transferred to dried NMR tubes containing varied amounts of the precatalyst (**1**): 0.10, 0.15, 0.20, 0.25, and 0.30 equiv. The reactions were performed, the percentage conversions were measured, and the plots were generated as described above. The rate order was calculated from the plot of ln(rate) against

$\ln(\text{aldehyde concentration})$  to be 1.16 ( $R^2 = 0.84$ ). Below, the table reports raw data; the plots shows  $[\text{aldehyde}]$  vs. time, and the  $\ln[\text{rate}]$  vs.  $\ln[\text{precatalyst}]$ .

| time (h)/M              | Aldehyde concentration for the reactions (varying precatalyst concentration) |                                          |                                          |                                          |                                          |
|-------------------------|------------------------------------------------------------------------------|------------------------------------------|------------------------------------------|------------------------------------------|------------------------------------------|
|                         | 30% precat.                                                                  | 25% precat.                              | 15% precat.                              | 10% precat.                              | 5% precat.                               |
| 0.00                    | 0.0900                                                                       | 0.0910                                   | 0.0920                                   | 0.0880                                   | 0.0950                                   |
| 1.00                    | 0.0760                                                                       | 0.0830                                   | 0.0850                                   | 0.0850                                   | 0.0930                                   |
| 2.00                    | 0.0640                                                                       | 0.0770                                   | 0.0780                                   | 0.0820                                   | 0.0920                                   |
| 3.00                    | 0.0520                                                                       | 0.0660                                   | 0.0680                                   | 0.0730                                   | 0.0910                                   |
| 4.00                    | 0.0390                                                                       | 0.0580                                   | 0.0570                                   | 0.0640                                   | 0.0900                                   |
| <b>Rate [M/h]</b>       | <b><math>-1.26 \times 10^{-2}</math></b>                                     | <b><math>-8.30 \times 10^{-3}</math></b> | <b><math>-8.70 \times 10^{-3}</math></b> | <b><math>-6.00 \times 10^{-3}</math></b> | <b><math>-1.20 \times 10^{-3}</math></b> |
| <b><math>R^2</math></b> | <b>1.00</b>                                                                  | <b>1.00</b>                              | <b>0.99</b>                              | <b>0.97</b>                              | <b>0.99</b>                              |

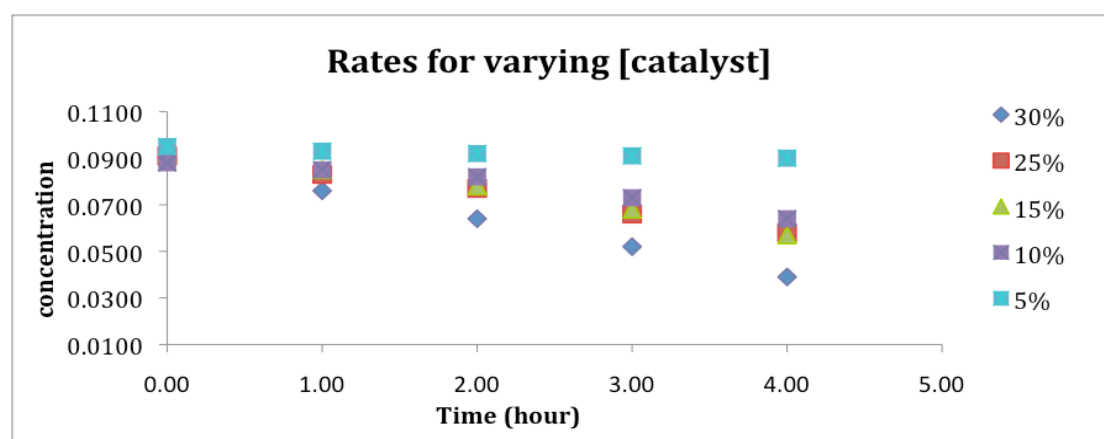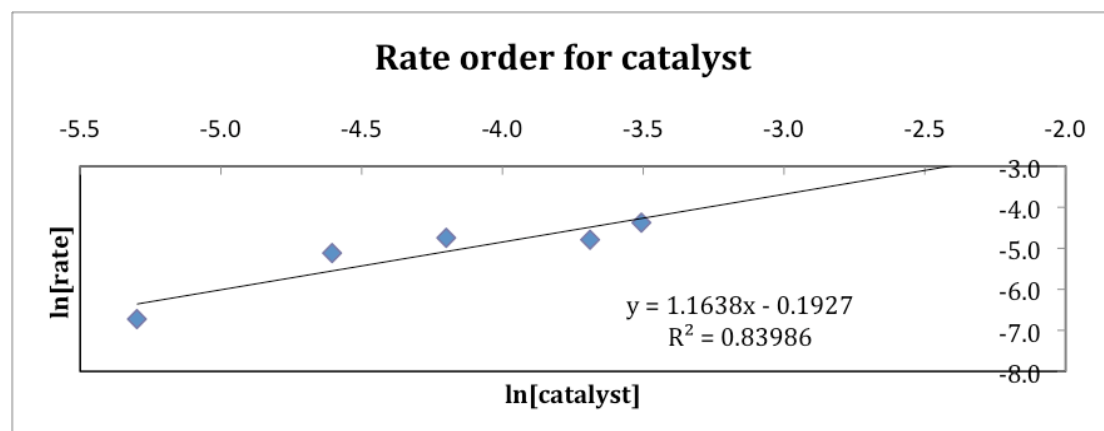

*Rate order for TBS-kojic acid:* A solution of the precatalyst (**1**, 0.1 equiv) and 1-(tert-butyl)-4-methoxybenzene (1.0 equiv as internal standard) was prepared using deuterated toluene (with 10% deuterated dichloromethane) and degassed. Then, 3-(2,4-dichlorophenyl) propionaldehyde was added to the solution, and the final solution was quickly transferred to dried NMR tubes containing varied amounts of 2-((tert-butyldimethylsilyloxy)methyl)-5-hydroxy-4H-pyran-4-one

or TBS-kojic acid: 1.0, 1.5, 2.0, 2.5, and 3.0 equiv. The reactions were performed, the percentage conversions were measured, and the plots were generated as described above. The rate order was calculated from the plot of  $\ln(\text{rate})$  against  $\ln(\text{aldehyde concentration})$  to be  $-0.53$  ( $R^2 = 0.41$ ). Below, the table reports raw data; the plots shows  $[\text{aldehyde}]$  vs. time, and the  $\ln[\text{rate}]$  vs.  $\ln[\text{TBS-kojic acid}]$ .

| time (h)/M              | Aldehyde concentration for the reactions (varying equiv of TBS-kojic acid) |                                          |                                          |                                          |                                          |
|-------------------------|----------------------------------------------------------------------------|------------------------------------------|------------------------------------------|------------------------------------------|------------------------------------------|
|                         | 3.0 equiv                                                                  | 2.5 equiv                                | 2.0 equiv                                | 1.5 equiv                                | 1.0 equiv                                |
| 1.00                    | 0.1070                                                                     | 0.1080                                   | 0.1040                                   | 0.0950                                   | 0.0920                                   |
| 2.00                    | 0.1070                                                                     | 0.1080                                   | 0.1040                                   | 0.0930                                   | 0.0920                                   |
| 3.00                    | 0.1040                                                                     | 0.1080                                   | 0.1000                                   | 0.0910                                   | 0.0880                                   |
| 4.00                    | 0.1020                                                                     | 0.1060                                   | 0.0910                                   | 0.0870                                   | 0.0790                                   |
| 5.00                    | 0.0950                                                                     | 0.1000                                   | 0.0800                                   | 0.0800                                   | 0.0660                                   |
| 6.00                    | 0.0810                                                                     | 0.0890                                   | 0.0650                                   | 0.0680                                   | 0.0530                                   |
| <b>Rate [M/h]</b>       | <b><math>-4.80 \times 10^{-3}</math></b>                                   | <b><math>-3.46 \times 10^{-3}</math></b> | <b><math>-7.89 \times 10^{-3}</math></b> | <b><math>-5.09 \times 10^{-3}</math></b> | <b><math>-8.06 \times 10^{-3}</math></b> |
| <b><math>R^2</math></b> | <b>0.90</b>                                                                | <b>0.85</b>                              | <b>0.95</b>                              | <b>0.94</b>                              | <b>0.95</b>                              |

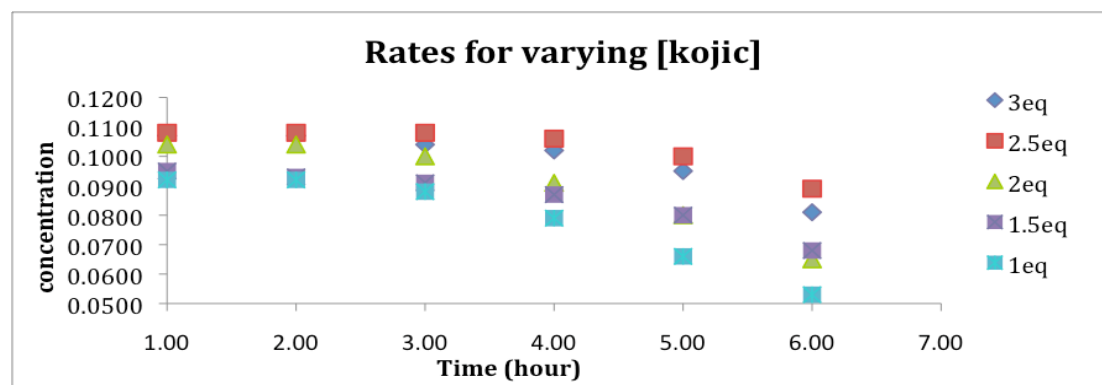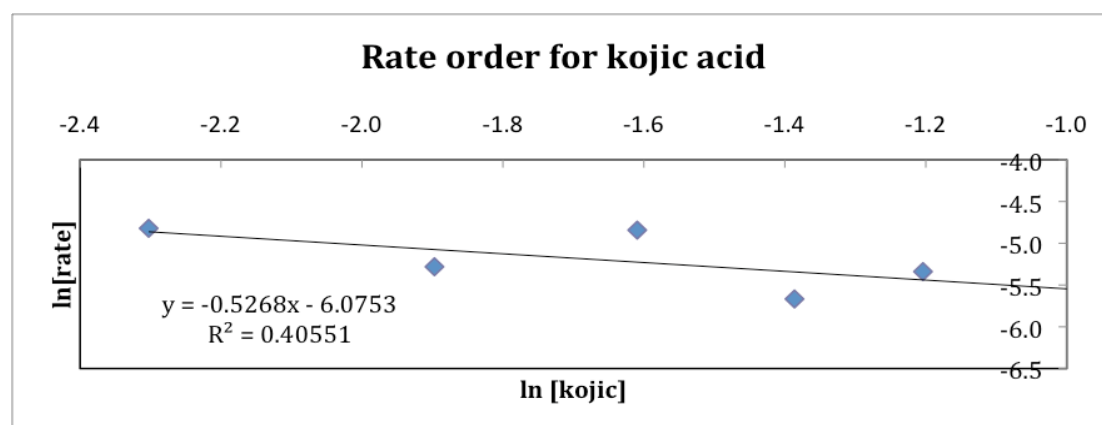



### Activation parameters measurement and analysis

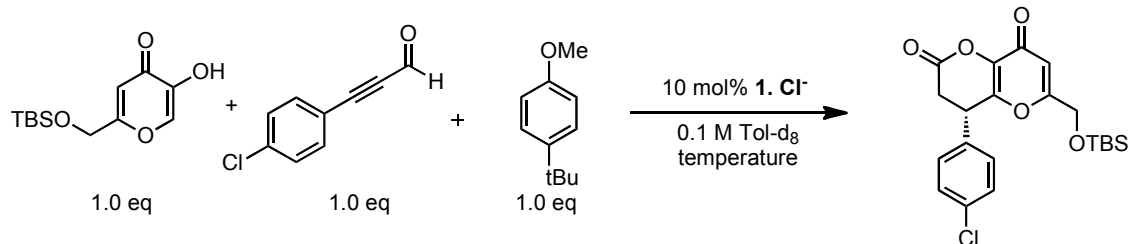

A solution of 2-((*tert*-butyldimethylsilyloxy)methyl)-5-hydroxy-4H-pyran-4-one (1.0 equiv), 3-(4-chlorophenyl)propionaldehyde (1.0 equiv), and 1-(*tert*-butyl)-4-methoxybenzene (1.0 equiv as internal standard), and 2-mesityl-6,7-dihydro-5H-pyrrolo[2,1-*c*][1,2,4]triazol-2-ium chloride (1, 2.0 mg, 0.005 mmol, 0.1 equiv) was prepared using 0.5 mL deuterated toluene (with 10% deuterated dichloromethane to ensure complete solubility). The reactions were performed in NMR tubes and placed in the preheated NMR instrument (temp at 30, 35, 40, 45, and 50°C). Percentage conversions were measured using  $^1\text{H}$  NMR by the disappearance of the ynal from the integration of the peak at 8.90 ppm (1H) against the internal standard peak at 1.22 ppm (9H).

The plots of molar concentration of the ynal versus time (hour) were generated; the rates were determined from the slope of each plot. The rate constants ( $k_{\text{obs}}$ ) were calculated from the experimentally determined rate law (1). The plot of  $\ln(k/T)$  vs  $1/T$  (in K) was then generated. Using the Eyring equation (2), the activation enthalpy ( $\Delta H^\ddagger$ ) was calculated from the slope to be 15.25 Kcal/mol, while the entropy of activation ( $\Delta S^\ddagger$ ) was calculated from the y-intercept to be -25.48 cal/K.mol. The table below reports raw data; the plot below shows  $\ln(k/T)$  vs  $1/T$ .

$$\text{Rate} = k_{\text{obs}} [\text{triazolium precatalyst}]^1 [\text{RCHO}]^{1/2} [\text{kojic acid}]^{-1/2} \quad (1)$$

$$\ln(k/T) = -(\Delta H^\ddagger/RT) + (\Delta S^\ddagger/R) + \ln(k_B/h) \quad (2)$$

where R = the gas constant;  $k_B$  = Boltzmann constant; and h = Planck's constant.

| time(s)/T(K)                              | Aldehyde concentration for the reactions (varying temperatures) |                              |                              |                              |                              |
|-------------------------------------------|-----------------------------------------------------------------|------------------------------|------------------------------|------------------------------|------------------------------|
|                                           | 323 K                                                           | 318 K                        | 313 K                        | 308 K                        | 303 K                        |
| 600                                       | 0.0639                                                          | 0.0715                       | 0.0718                       | 0.0741                       | 0.0681                       |
| 900                                       | 0.0601                                                          | 0.0708                       | 0.0712                       | 0.0732                       | 0.0677                       |
| 1200                                      | 0.0567                                                          | 0.0692                       | 0.0701                       | 0.0716                       | 0.0670                       |
| 1500                                      | 0.0537                                                          | 0.0673                       | 0.0691                       | 0.0703                       | 0.0663                       |
| 1800                                      | 0.0510                                                          | 0.0655                       | 0.0682                       | 0.0694                       | 0.0663                       |
| 2100                                      | 0.0478                                                          | 0.0641                       | 0.0674                       | 0.0683                       | 0.0659                       |
| 2400                                      | 0.0466                                                          | 0.0627                       | 0.0657                       | 0.0674                       | 0.0656                       |
| 2700                                      | 0.0442                                                          | 0.0612                       | 0.0649                       | 0.0665                       | 0.0648                       |
| 3000                                      | 0.0402                                                          | 0.0597                       | 0.0642                       | 0.0658                       | 0.0647                       |
| 3300                                      | 0.0384                                                          | 0.0584                       | 0.0627                       | 0.0644                       | 0.0640                       |
| <b>Rate [M/sec]</b>                       | <b>-9.21x10<sup>-6</sup></b>                                    | <b>-5.08x10<sup>-6</sup></b> | <b>-3.41x10<sup>-6</sup></b> | <b>-3.50x10<sup>-6</sup></b> | <b>-1.44x10<sup>-6</sup></b> |
| <b>R<sup>2</sup></b>                      | <b>0.99</b>                                                     | <b>1.00</b>                  | <b>0.99</b>                  | <b>0.99</b>                  | <b>0.98</b>                  |
| <b>k<sub>obs</sub> [sec<sup>-1</sup>]</b> | <b>9.21x10<sup>-4</sup></b>                                     | <b>5.08x10<sup>-4</sup></b>  | <b>3.41x10<sup>-4</sup></b>  | <b>3.50x10<sup>-4</sup></b>  | <b>1.44x10<sup>-4</sup></b>  |

| ln(k/T) | 1/T (K <sup>-1</sup> ) | Constants                                                           |                        | Parameters     |          |
|---------|------------------------|---------------------------------------------------------------------|------------------------|----------------|----------|
| -12.77  | 3.096x10 <sup>-3</sup> | R(cal/Kmol)                                                         | 1.986                  | slope          | -7679.66 |
| -13.35  | 3.145x10 <sup>-3</sup> | k <sub>B</sub> (m <sup>2</sup> kg s <sup>-2</sup> K <sup>-1</sup> ) | 1.38x10 <sup>-23</sup> | R <sup>2</sup> | 0.91     |
| -13.73  | 3.195x10 <sup>-3</sup> | h (m <sup>2</sup> kg s <sup>-1</sup> )                              | 6.63x10 <sup>-34</sup> | y-intercept    | 10.93    |
| -13.69  | 3.247x10 <sup>-3</sup> | $\Delta H^\ddagger = 15.25$ (Kcal/mol)                              |                        |                |          |
| -14.56  | 3.300x10 <sup>-3</sup> | $\Delta S^\ddagger = -25.48$ (cal/mol.K)                            |                        |                |          |

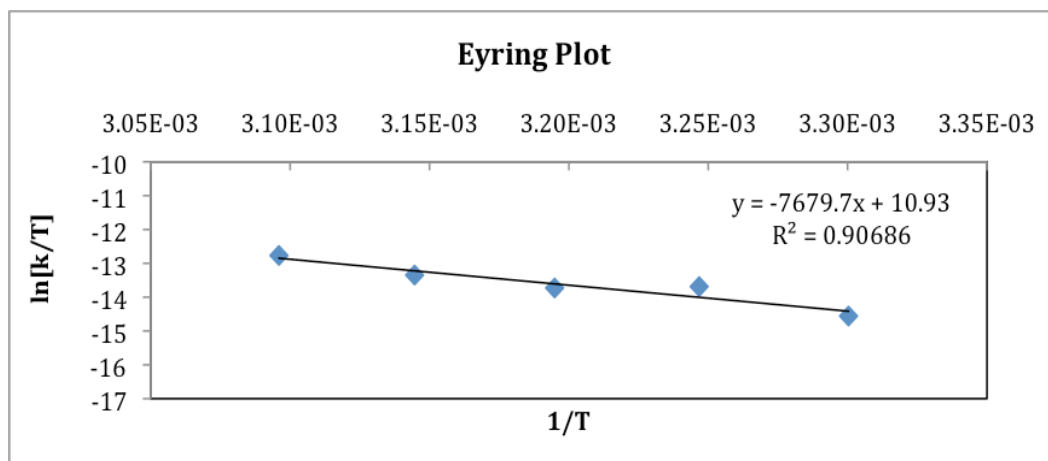

## Derivation of the rate law for azolium-catalyzed Claisen rearrangement pathway

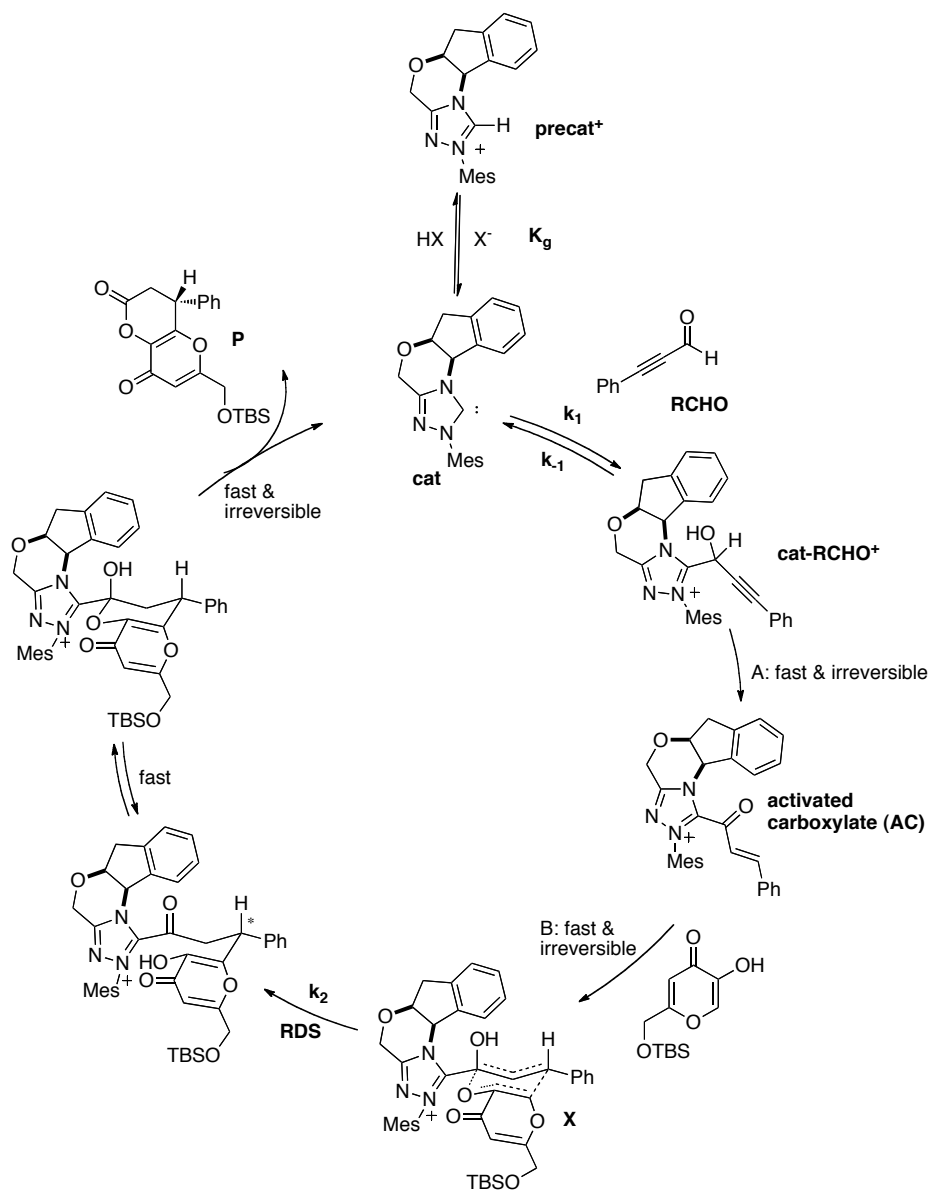

The unimolecular sigmatropic rearrangement is proposed to be the rate-determining step. Assuming that redox reaction, protonation steps, and 1,2-addition step are fast and irreversible, that is  $[cat - RCHO^+] \approx [X]$ , the overall rate is defined as:

$$\frac{d[P]}{dt} = k_2[cat - RCHO^+]$$

The equilibrium constant ( $K_g$ ) for the generation of the active catalyst is defined as:

$$K_g = \frac{[cat][HX]}{[precat^+][X^-]} \text{ or } [precat^+] = \frac{1}{K_g} \frac{[cat][HX]}{[X^-]} \quad \text{eq 1.}$$

The overall catalyst concentration is defined as:

$$[cat]_0 = [cat] + [precat^+] + [cat - RCHO^+] \quad \text{eq 2.}$$

Substitute eq. 1 into eq. 2 to obtain:

$$[cat]_0 = [cat] + \frac{1}{K_g} \frac{[cat][HX]}{[X^-]} + [cat - RCHO^+] \text{ or } \left(1 + \frac{1}{K_g} \frac{[HX]}{[X^-]}\right)[cat] = [cat]_0 - [cat - RCHO^+] \quad \text{eq 3.}$$

$$[cat] = \frac{[cat]_0 - [cat - RCHO^+]}{1 + \frac{1}{K_g} \frac{[HX]}{[X^-]}}$$

The rate of the catalyst-aldehyde complex can be expressed by:

$$\frac{d[cat - RCHO^+]}{dt} = k_1[cat][RCHO] - k_{-1}[cat - RCHO^+] - k_2[cat - RCHO^+] \quad \text{eq 4.}$$

Assuming that the concentration of catalyst-aldehyde complex does not change over time (steady state approximation); thus,

$$\frac{d[cat - RCHO^+]}{dt} = k_1[cat][RCHO] - k_{-1}[cat - RCHO^+] - k_2[cat - RCHO^+] = 0 \quad \text{eq 5.}$$

Substitute eq. 3 into eq. 5 to obtain:

$$k_1 \frac{[cat]_0 - [cat - RCHO^+]}{1 + \frac{1}{K_g} \frac{[HX]}{[X^-]}} [RCHO] - k_{-1}[cat - RCHO^+] - k_2[cat - RCHO^+] = 0$$

$$\frac{k_1}{1 + \frac{1}{K_g} \frac{[HX]}{[X^-]}} [cat]_0 [RCHO] = (k_{-1} + k_2 + \frac{k_1}{1 + \frac{1}{K_g} \frac{[HX]}{[X^-]}} [RCHO]) [cat - RCHO^+]$$

$$[cat - RCHO^+] = \frac{\frac{k_1}{1 + \frac{1}{K_g} \frac{[HX]}{[X^-]}} [cat]_0 [RCHO]}{k_{-1} + k_2 + \frac{k_1}{1 + \frac{1}{K_g} \frac{[HX]}{[X^-]}} [RCHO]}$$

$$[cat - RCHO^+] = \frac{[cat]_0 [RCHO]}{[RCHO] + \frac{k_{-1} + k_2}{k_1} \left(1 + \frac{1}{K_g} \frac{[HX]}{[X^-]}\right)} \quad \text{eq 6.}$$

Assuming that the sigmatropic rearrangement is the rate-determining step; thus,

$$\frac{d[P]}{dt} = k_2 [cat - RCHO^+] \quad \text{eq 7.}$$

Substituted eq. 6 into the rate equation 7, the rate law may be expressed as:

$$\frac{d[P]}{dt} = k_2 \frac{[cat]_0 [RCHO]}{[RCHO] + \frac{k_{-1} + k_2}{k_1} \left(1 + \frac{1}{K_g} \frac{[HX]}{[X^-]}\right)} \quad \text{eq 8.}$$

$$\text{Where } K_g = \frac{[cat][HX]}{[precat^+][X^-]}.$$

Alternatively, eq. 8 may be expressed in terms of the dissociation constant ( $K_a$ ) of a general acid (HX):

$$K_a = \frac{[H^+][X^-]}{[HX]} \quad \text{or} \quad \frac{[HX]}{[X^-]} = \frac{[H^+]}{K_a} \quad \text{eq 9.}$$

Substitute eq. 9 into eq. 8, the rate law may be expressed as:

$$\frac{d[P]}{dt} = k_2 \frac{[cat]_0 [RCHO]}{[RCHO] + \frac{k_{-1} + k_2}{k_1} \left(1 + \frac{1}{K_g K_a} [H^+]\right)} \quad \text{eq 10.}$$

## Derivation of the rate law for azolium-catalyzed conjugate addition pathway

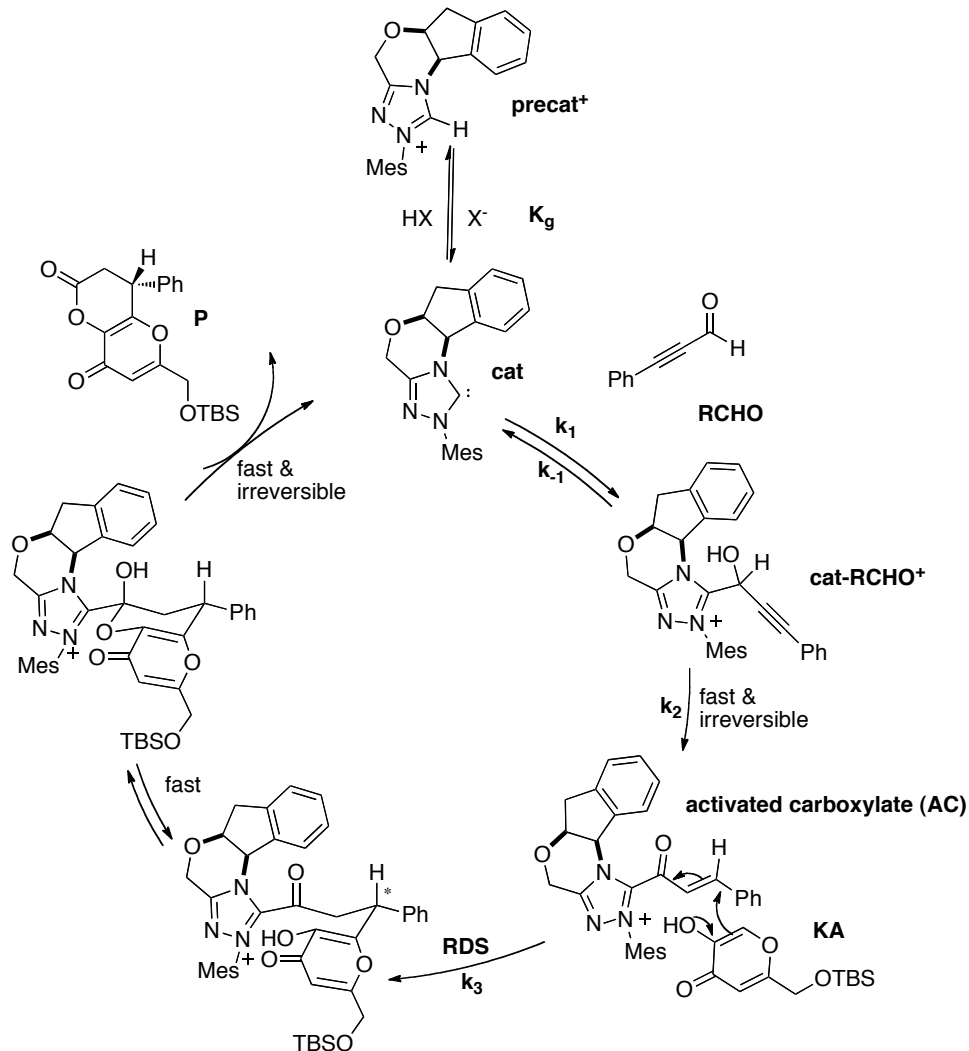

The bimolecular conjugation addition is proposed to be the rate-determining step. Assuming that redox and protonation step is fast and irreversible, that is  $[cat-RCHO^+] \approx [AC]$ , the overall rate is defined as:

$$\frac{d[P]}{dt} = k_3 [cat-RCHO^+] [KA]$$

The equilibrium constant ( $K_g$ ) for the generation of the active catalyst is defined as:

$$K_g = \frac{[cat][HX]}{[precat^+][X^-]} \quad \text{or} \quad [precat^+] = \frac{1}{K_g} \frac{[cat][HX]}{[X^-]} \quad \text{eq 11.}$$

The overall catalyst concentration is defined as:

$$[cat]_0 = [cat] + [precat^+] + [cat - RCHO^+] \quad \text{eq 12.}$$

Substitute eq. 11 into eq. 12 to obtain:

$$[cat]_0 = [cat] + \frac{1}{K_g} \frac{[cat][HX]}{[X^-]} + [cat - RCHO^+] \quad \text{or} \quad \left(1 + \frac{1}{K_g} \frac{[HX]}{[X^-]}\right)[cat] = [cat]_0 - [cat - RCHO^+]$$

$$[cat] = \frac{[cat]_0 - [cat - RCHO^+]}{1 + \frac{1}{K_g} \frac{[HX]}{[X^-]}} \quad \text{eq 13.}$$

The rate of the catalyst-aldehyde complex can be expressed by:

$$\frac{d[cat - RCHO^+]}{dt} = k_1[cat][RCHO] - k_{-1}[cat - RCHO^+] - k_2[cat - RCHO^+] \quad \text{eq 14.}$$

Assuming that the concentration of catalyst-aldehyde complex does not change over time (steady state approximation); thus,

$$\frac{d[cat - RCHO^+]}{dt} = k_1[cat][RCHO] - k_{-1}[cat - RCHO^+] - k_2[cat - RCHO^+] = 0 \quad \text{eq 15.}$$

Substitute eq. 13 into eq. 15 to obtain:

$$k_1 \frac{[cat]_0 - [cat - RCHO^+]}{1 + \frac{1}{K_g} \frac{[HX]}{[X^-]}} [RCHO] - k_{-1}[cat - RCHO^+] - k_2[cat - RCHO^+] = 0$$

$$\frac{k_1}{1 + \frac{1}{K_g} \frac{[HX]}{[X^-]}} [cat]_0 [RCHO] = (k_{-1} + k_2 + \frac{k_1}{1 + \frac{1}{K_g} \frac{[HX]}{[X^-]}} [RCHO]) [cat - RCHO^+]$$

$$[cat - RCHO^+] = \frac{\frac{k_1}{1 + \frac{1}{K_g} \frac{[HX]}{[X^-]}} [cat]_0 [RCHO]}{k_{-1} + k_2 + \frac{k_1}{1 + \frac{1}{K_g} \frac{[HX]}{[X^-]}} [RCHO]}$$

$$[cat - RCHO^+] = \frac{[cat]_0[RCHO]}{[RCHO] + \frac{k_{-1} + k_2}{k_1} \left(1 + \frac{1}{K_g} \frac{[HX]}{[X^-]}\right)} \quad \text{eq 16.}$$

Assuming that the bimolecular conjugate addition is the rate-determining step; thus,

$$\frac{d[P]}{dt} = k_3[cat - RCHO^+][KA] \quad \text{eq 17.}$$

Substitute eq. 16 into eq. 17, the rate law may be expressed as:

$$\frac{d[P]}{dt} = k_3 \frac{[cat]_0[RCHO][KA]}{[RCHO] + \frac{k_{-1} + k_2}{k_1} \left(1 + \frac{1}{K_g} \frac{[HX]}{[X^-]}\right)} \quad \text{eq 18.}$$

$$\text{Where } K_g = \frac{[cat][HX]}{[precat^+][X^-]}.$$

Alternatively, eq. 18 may be expressed in terms of the dissociation constant ( $K_a$ ) of a general acid (HX):

$$K_a = \frac{[H^+][X^-]}{[HX]} \quad \text{or} \quad \frac{[HX]}{[X^-]} = \frac{[H^+]}{K_a} \quad \text{eq 19.}$$

Substitute eq. 19 into eq. 18, the rate law may be expressed as:

$$\frac{d[P]}{dt} = k_3 \frac{[cat]_0[RCHO][KA]}{[RCHO] + \frac{k_{-1} + k_2}{k_1} \left(1 + \frac{1}{K_g K_a} [H^+]\right)} \quad \text{eq 20.}$$



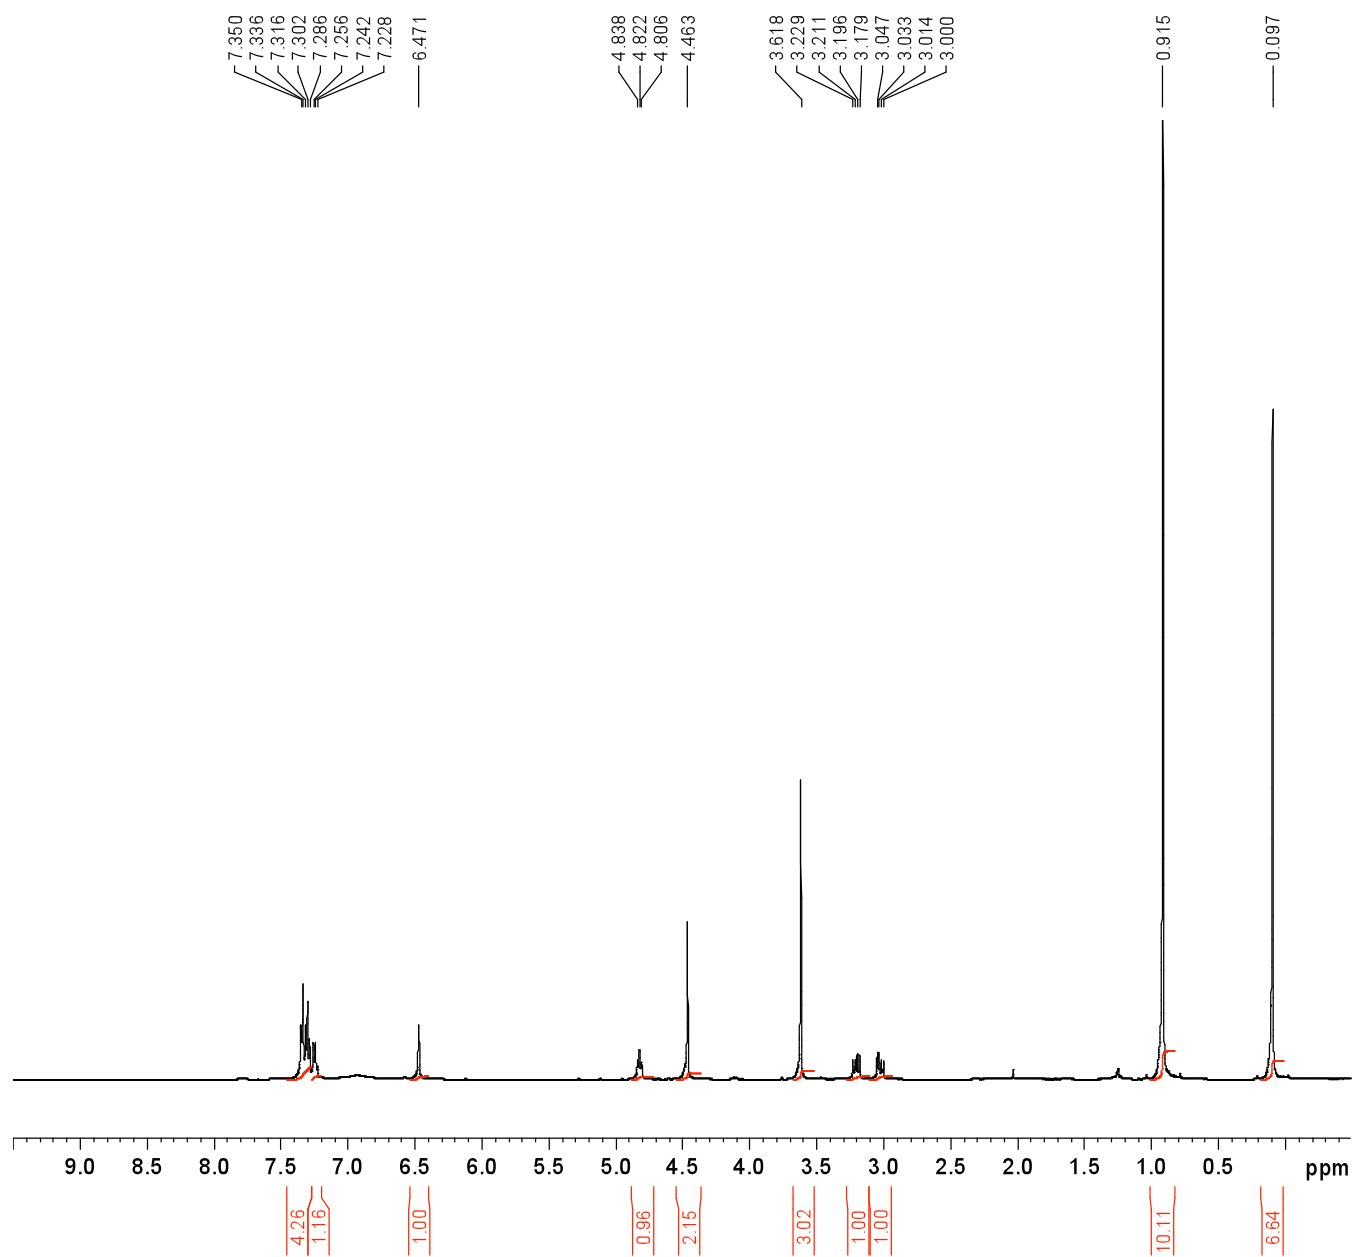

```

Current Data Parameters
NAME      I-JM-59pt1c
EXPNO     2
PROCNO    1

F2 - Acquisition Parameters
Date_     20090825
Time      18.52
INSTRUM   spect
PROBHD    5 mm PABBO BB-
PULPROG   zg30
TD         65536
SOLVENT   CDCl3
NS         11
DS         2
SWH        7002.801 Hz
FIDRES     0.106854 Hz
AQ         4.6793203 sec
RG         71.8
DW         71.400 usec
DE         6.50 usec
TE         297.3 K
D1         1.00000000 sec
TD0        1

===== CHANNEL f1 =====
NUC1       1H
P1         10.76 usec
PL1        0.00 dB
SFO1       500.3932525 MHz

F2 - Processing parameters
SI         32768
SF         500.3900160 MHz
WDW        EM
SSB        0
LB         0.30 Hz
GB         0
PC         1.00
    
```

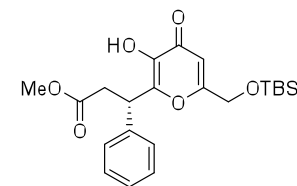

**2**

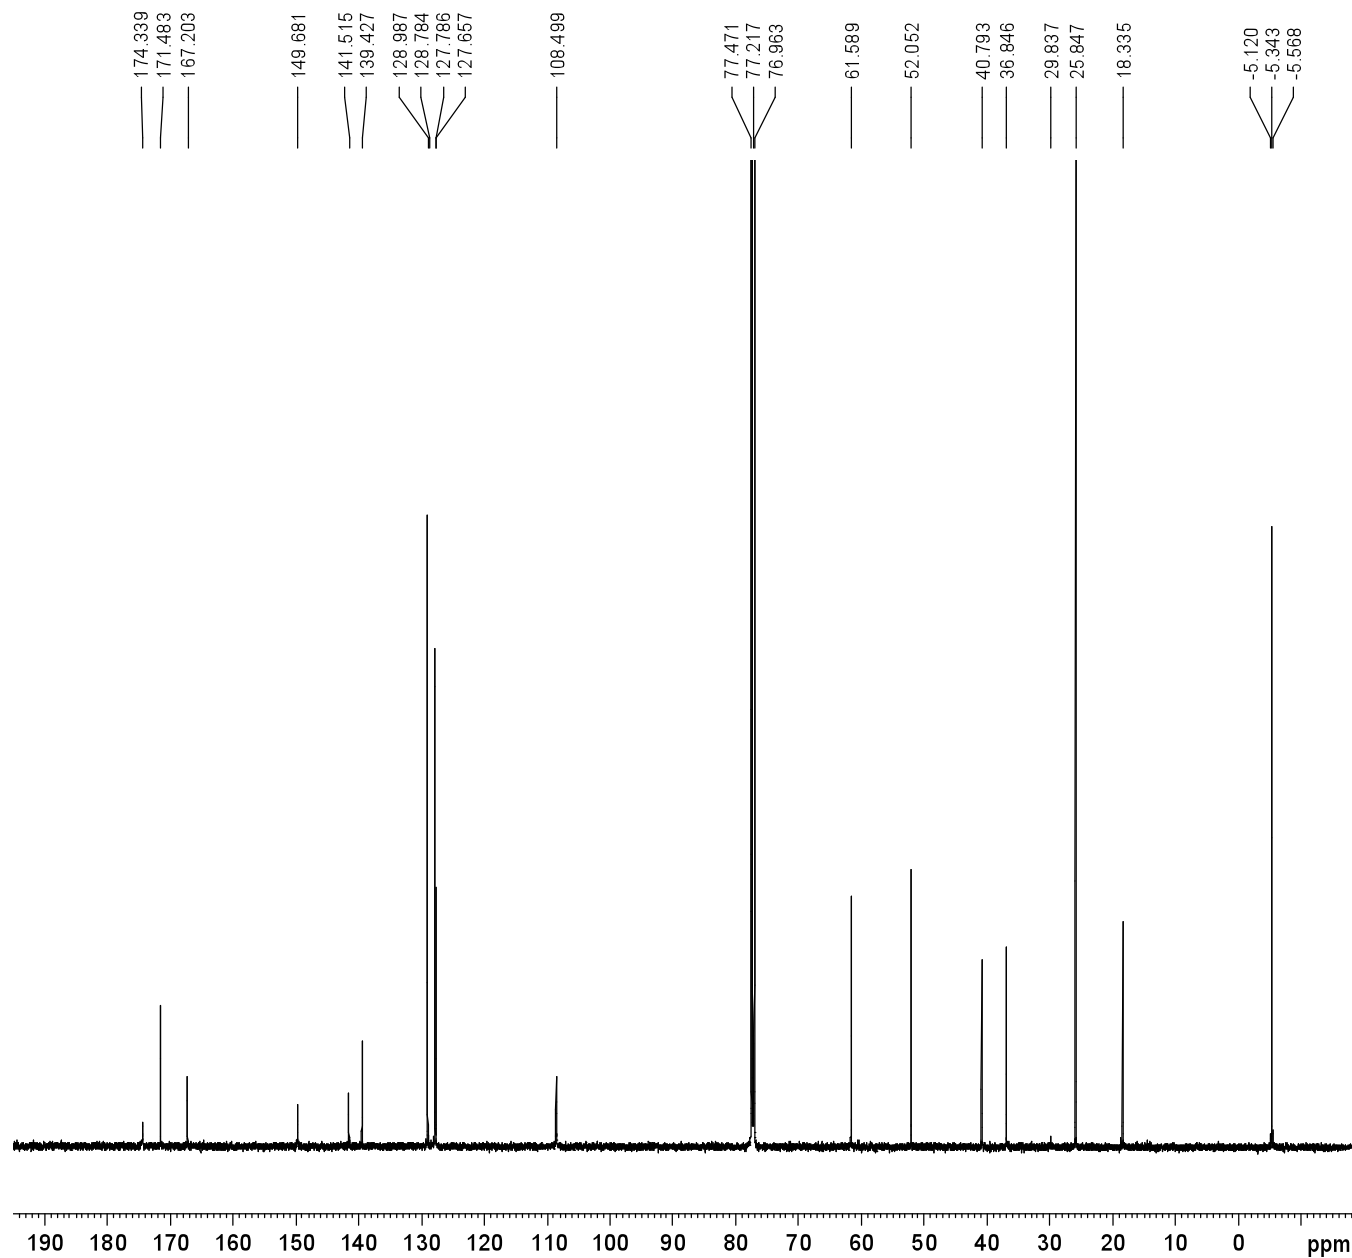

```

Current Data Parameters
NAME      I-JM-55-carbon
EXPNO    1
PROCNO   1

F2 - Acquisition Parameters
Date_    2008025
Time     15.53
INSTRUM  spect
PROBHD   5 mm PABBO BB-
PULPROG  zgpg30
TD       65536
SOLVENT  CDCl3
NS       722
DS       4
SWH      25761.904 Hz
FIDRES   0.454131 Hz
AQ       1.1010548 sec
RG       1290
DW       16.800 usec
DE       6.50 usec
TE       298.3 K
D1       2.0000000 sec
d11      0.0300000 sec
DELTA    1.8555558 sec
TDO      1

===== CHANNEL f1 =====
NUC1      13C
P1        7.50 usec
PL1       1.00 dB
SFO1      125.8357479 MHz

===== CHANNEL f2 =====
CPDPRG2   waltz16
NUC2      1H
PCPD2     80.00 usec
PL12      17.43 dB
PL13      18.43 dB
PL2       0.00 dB
SFO2      500.3520016 MHz

F2 - Processing parameters
SI        32768
SF        125.8231500 MHz
WDW       EM
SSB       0
LB        1.00 Hz
GB        0
PC        1.40
    
```

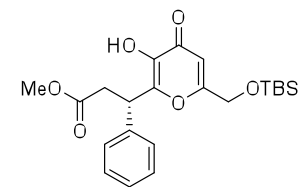

2

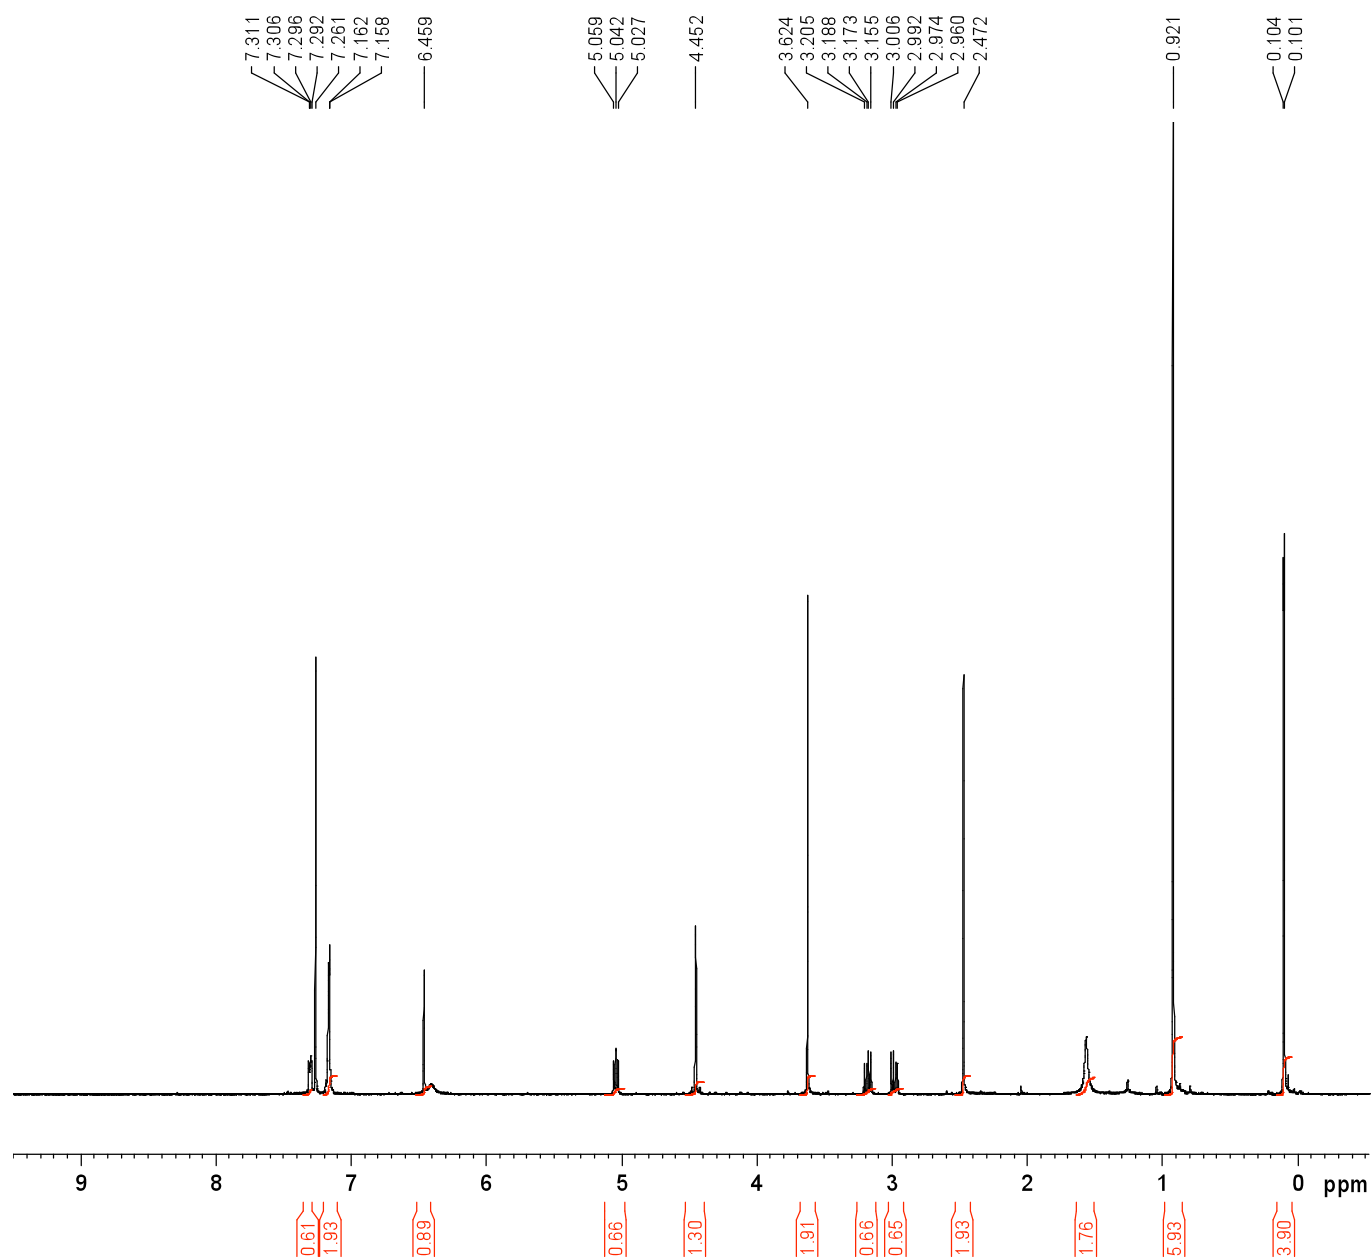

```

Current Data Parameters
NAME          V95Racc
EXPNO         1
PROCNO        1

F2 - Acquisition Parameters
Date_         20090923
Time          19.14
INSTRUM       spect
PROBHD        5 mm PABBO BB-
PULPROG       zg30
TD            65536
SOLVENT       CDCl3
NS            8
DS            2
SWH           7002.801 Hz
FIDRES        0.106854 Hz
AQ            4.6793203 sec
RG            512
DW            71.400 usec
DE            6.50 usec
TE            298.2 K
D1            1.00000000 sec
TDO           1

===== CHANNEL f1 =====
NUC1           1H
P1             10.76 usec
PL1            0.00 dB
SFO1           500.3932525 MHz

F2 - Processing parameters
SI             32768
SF            500.3900160 MHz
WDW            EM
SSB            0
LB             0.30 Hz
GB             0
PC             1.00

```

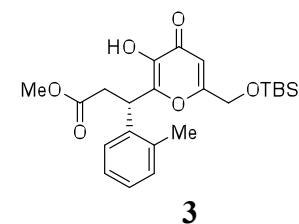

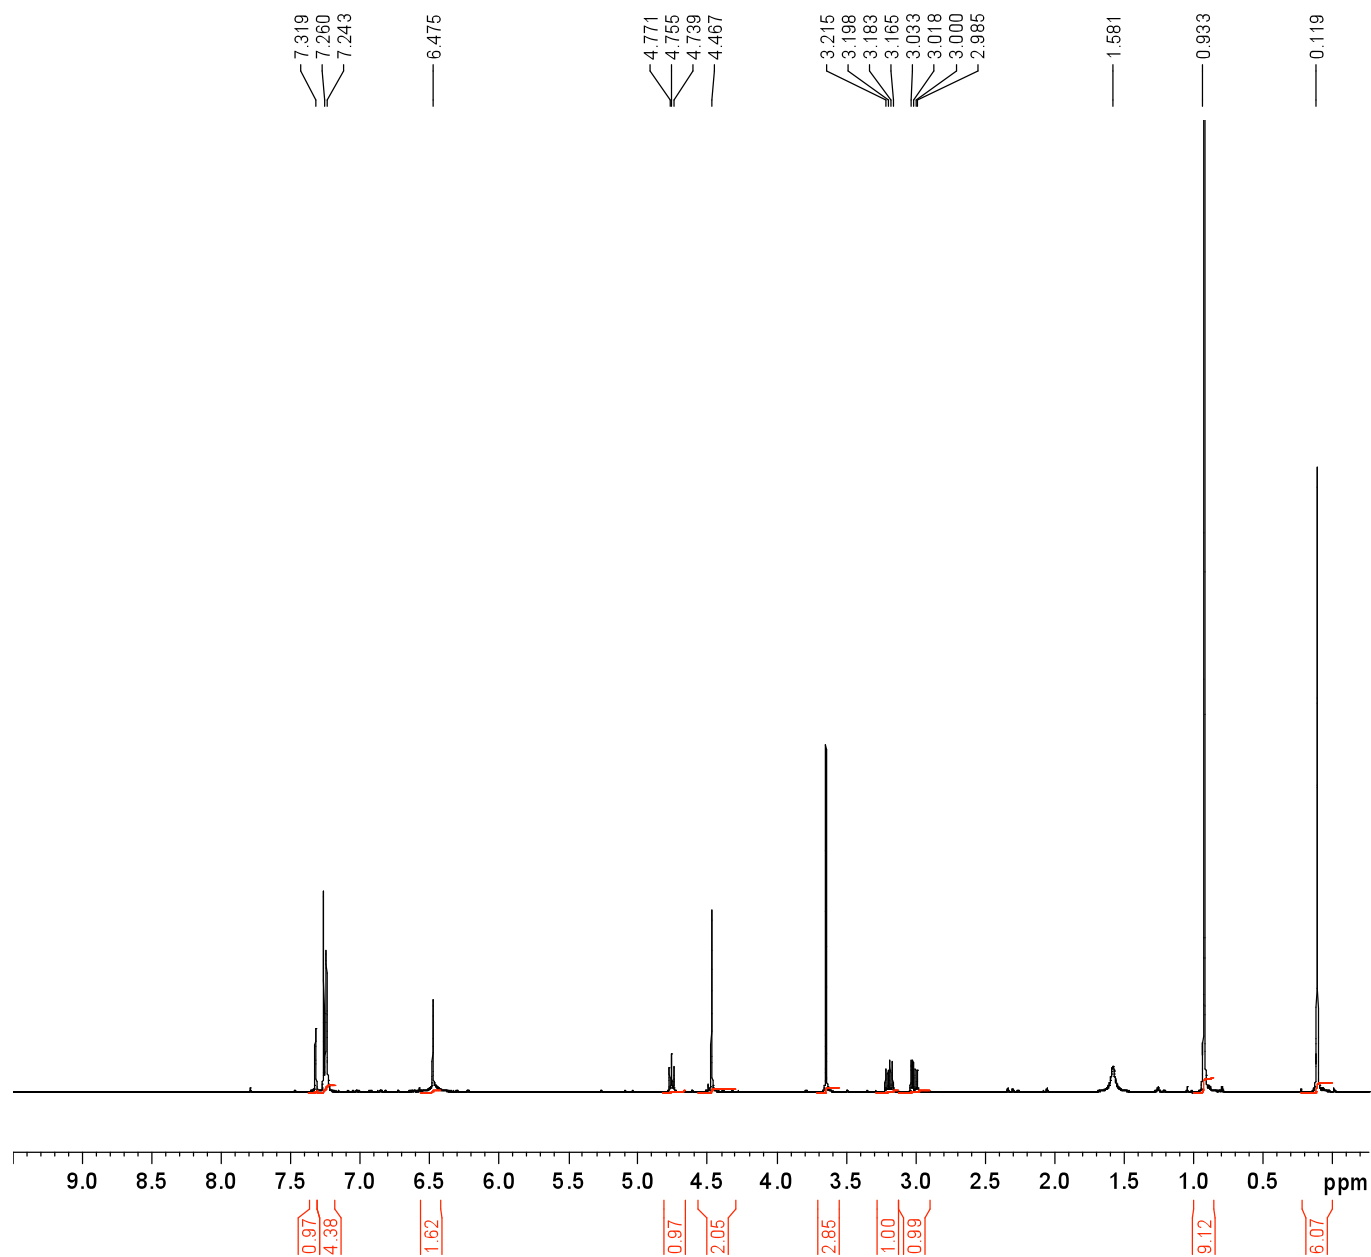

```

Current Data Parameters
NAME      I-JM-66prep
EXPNO     6
PROCNO    1

F2 - Acquisition Parameters
Date_     20090919
Time      17.48
INSTRUM   spect
PROBHD    5 mm PABBO BB-
PULPROG   zg30
TD         65536
SOLVENT   CDCl3
NS         10
DS         2
SWH        7002.801 Hz
FIDRES     0.106854 Hz
AQ         4.6793203 sec
RG         575
DW         71.400 usec
DE         6.50 usec
TE         298.2 K
D1         1.00000000 sec
TDO        1

===== CHANNEL f1 =====
NUC1       1H
P1         10.76 usec
PL1        0.00 dB
SF01       500.3932525 MHz

F2 - Processing parameters
SI         32768
SF         500.3900160 MHz
WDW        EM
SSB        0
LB         0.30 Hz
GB         0
PC         1.00
    
```

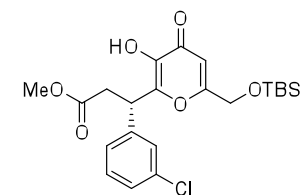

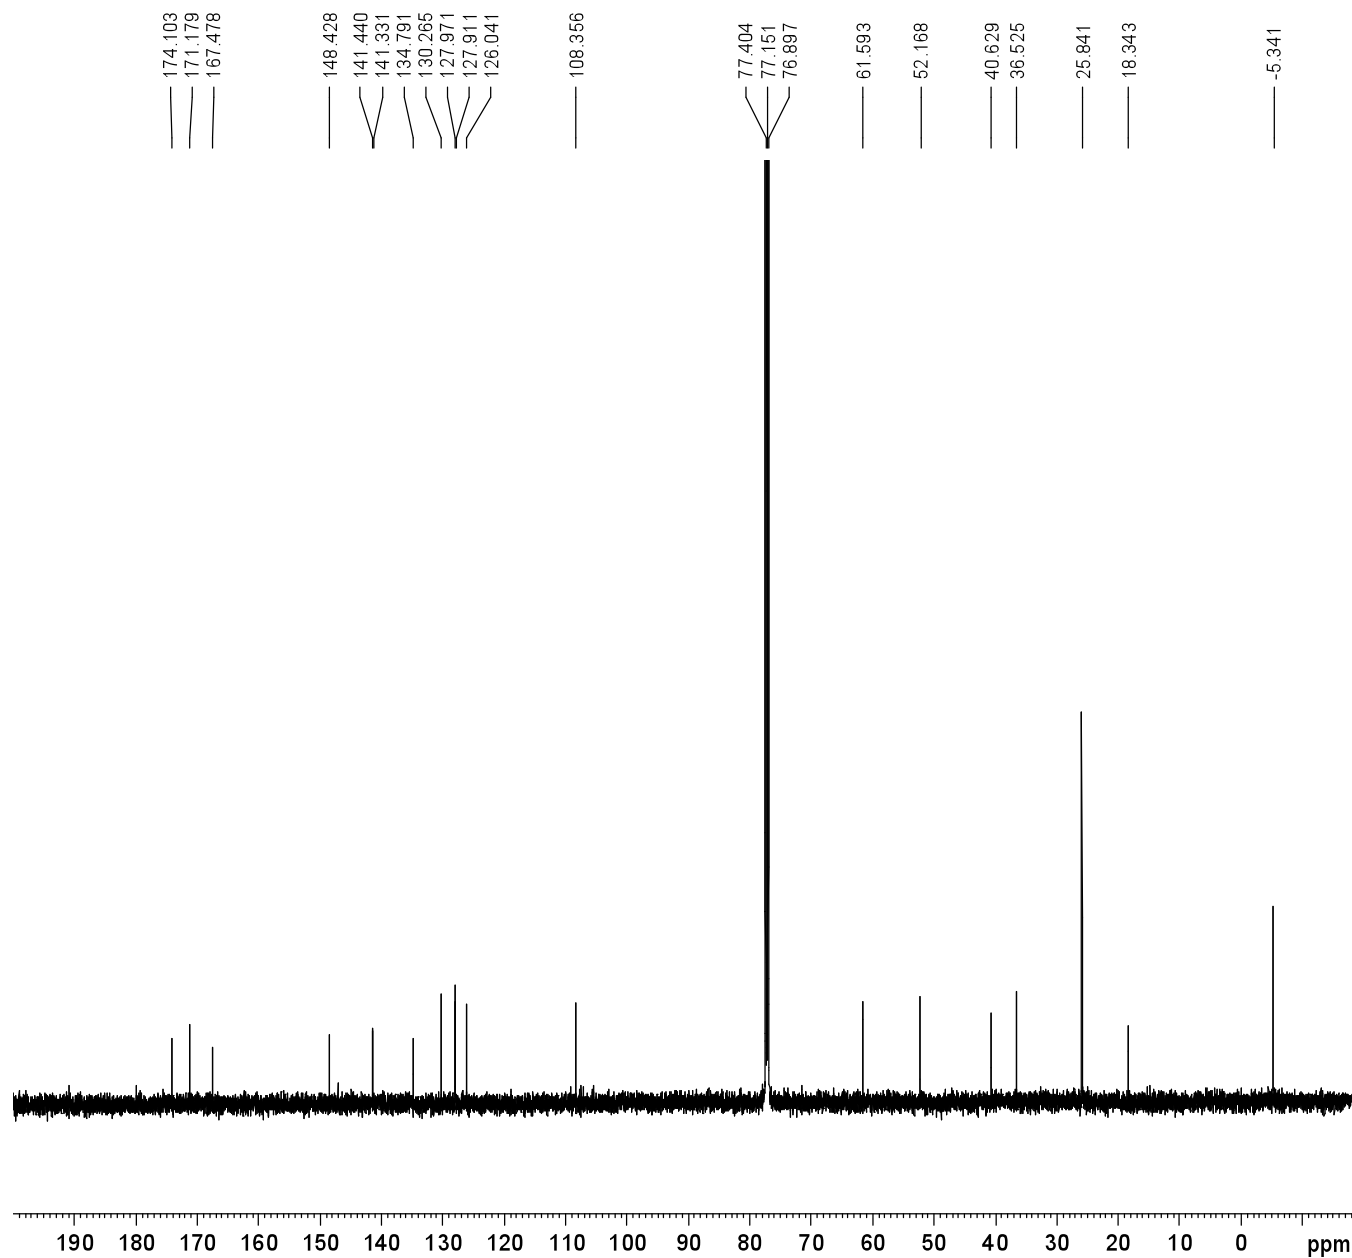

```

Current Data Parameters
NAME      I-M-6Epre13C
EXPNO    1
PROCNO   1

F2 - Acquisition Parameters
Date_    20090116
Time     18.33
INSTRUM  spect
PROBHD   5 mm PABBO BB-
PULPROG  zgpg30
TD        65536
SOLVENT  CDCl3
NS        1000
DS        4
SWH       29761.904 Hz
FIDRES   0.454131 Hz
AQ        1.1010548 sec
RG        1290
DW        16.000 usec
DE        6.50 usec
TE        298.7 K
D1        2.0000000 sec
d11       0.0300000 sec
DELTA    1.0595999 sec
TDO       1

===== CHANNEL f1 =====
NUC1      13C
P1        7.50 usec
PL1       1.00 dB
SFO1     125.8357479 MHz

===== CHANNEL f2 =====
CPDPRG2  waltz16
NUC2      1H
PCPD2    80.00 usec
PL12     17.43 dB
PL13     18.43 dB
PL2      0.00 dB
SFO2     500.3920016 MHz

F2 - Processing parameters
SI        32768
SF        125.8231500 MHz
WDW       EM
SSB       0
LB        1.00 Hz
GB        0
PC        1.40
    
```

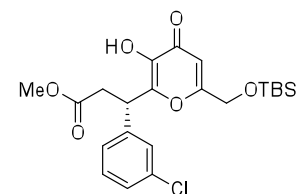

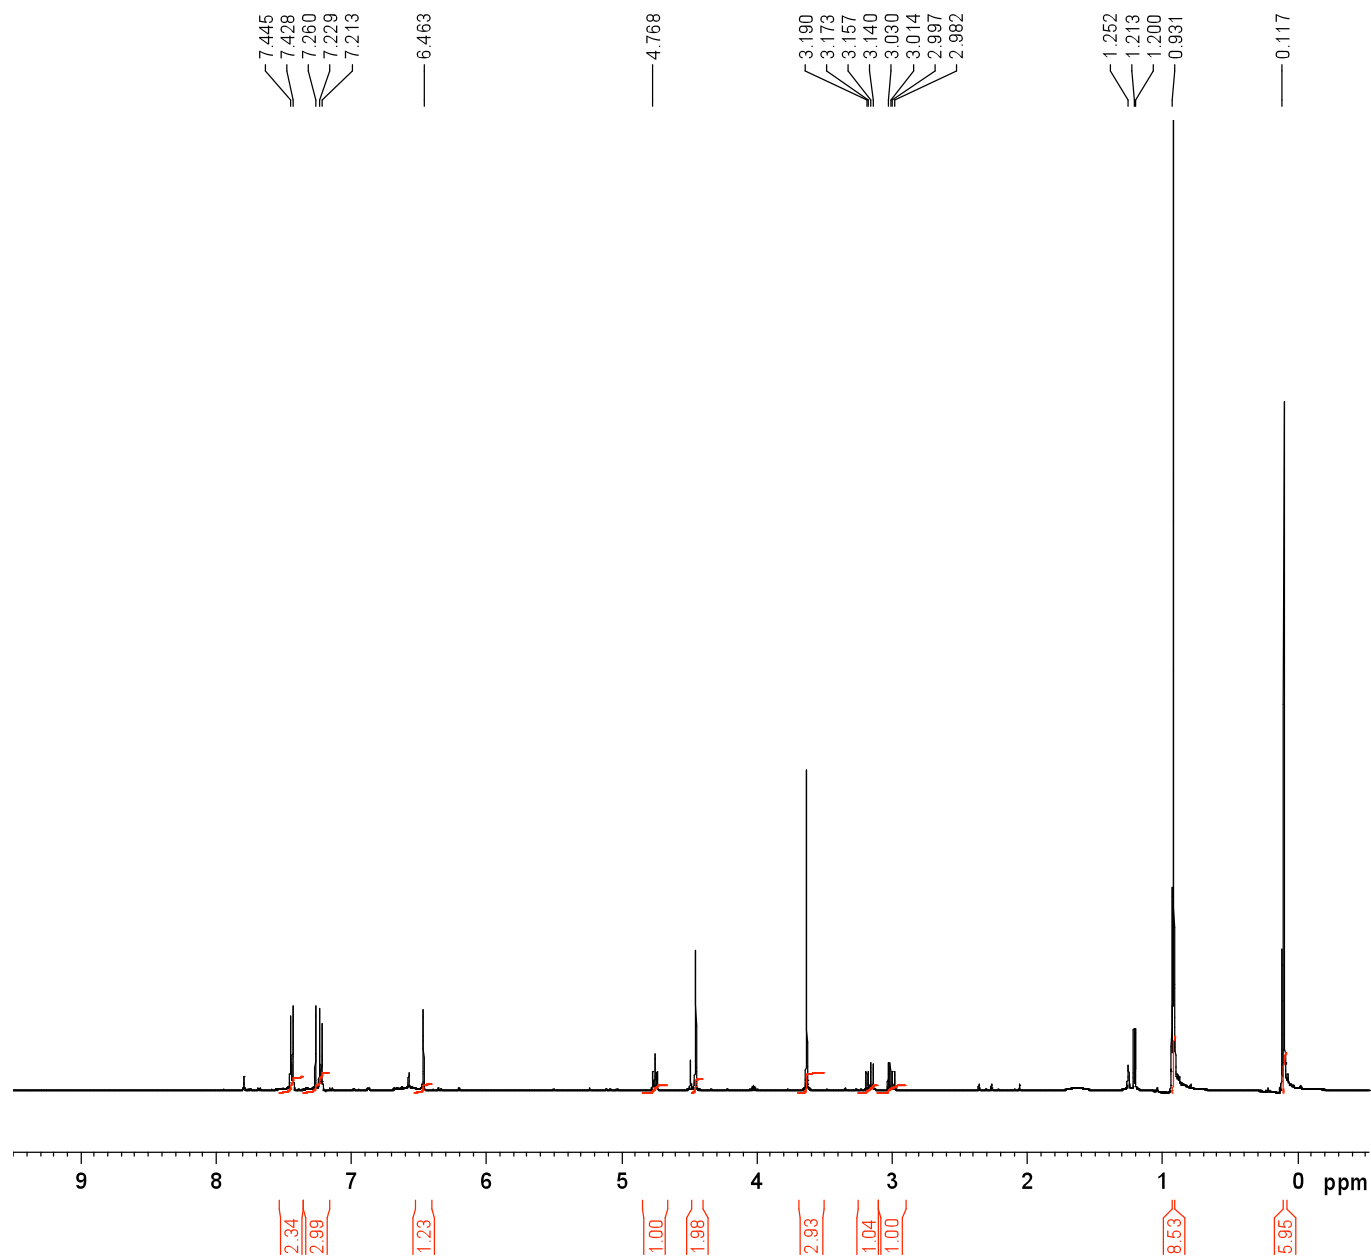

```

Current Data Parameters
NAME      I-JM-65_prep
EXPNO    1
PROCNO   1

F2 - Acquisition Parameters
Date_    20090919
Time     19.56
INSTRUM  spect
PROBHD   5 mm PABBO BB-
PULPROG  zg30
TD       65536
SOLVENT  CDCl3
NS       13
DS       2
SWH      7002.801 Hz
FIDRES   0.106854 Hz
AQ       4.6793203 sec
RG       256
DW       71.400 usec
DE       6.50 usec
TE       298.3 K
D1       1.00000000 sec
TDO      1

===== CHANNEL f1 =====
NUC1     1H
P1       10.76 usec
PL1      0.00 dB
SFO1    500.3932525 MHz

F2 - Processing parameters
SI       32768
SF       500.3900160 MHz
WDW      EM
SSB      0
LB       0.30 Hz
GB       0
PC       1.00
    
```

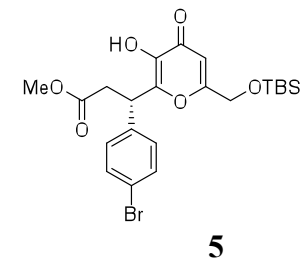

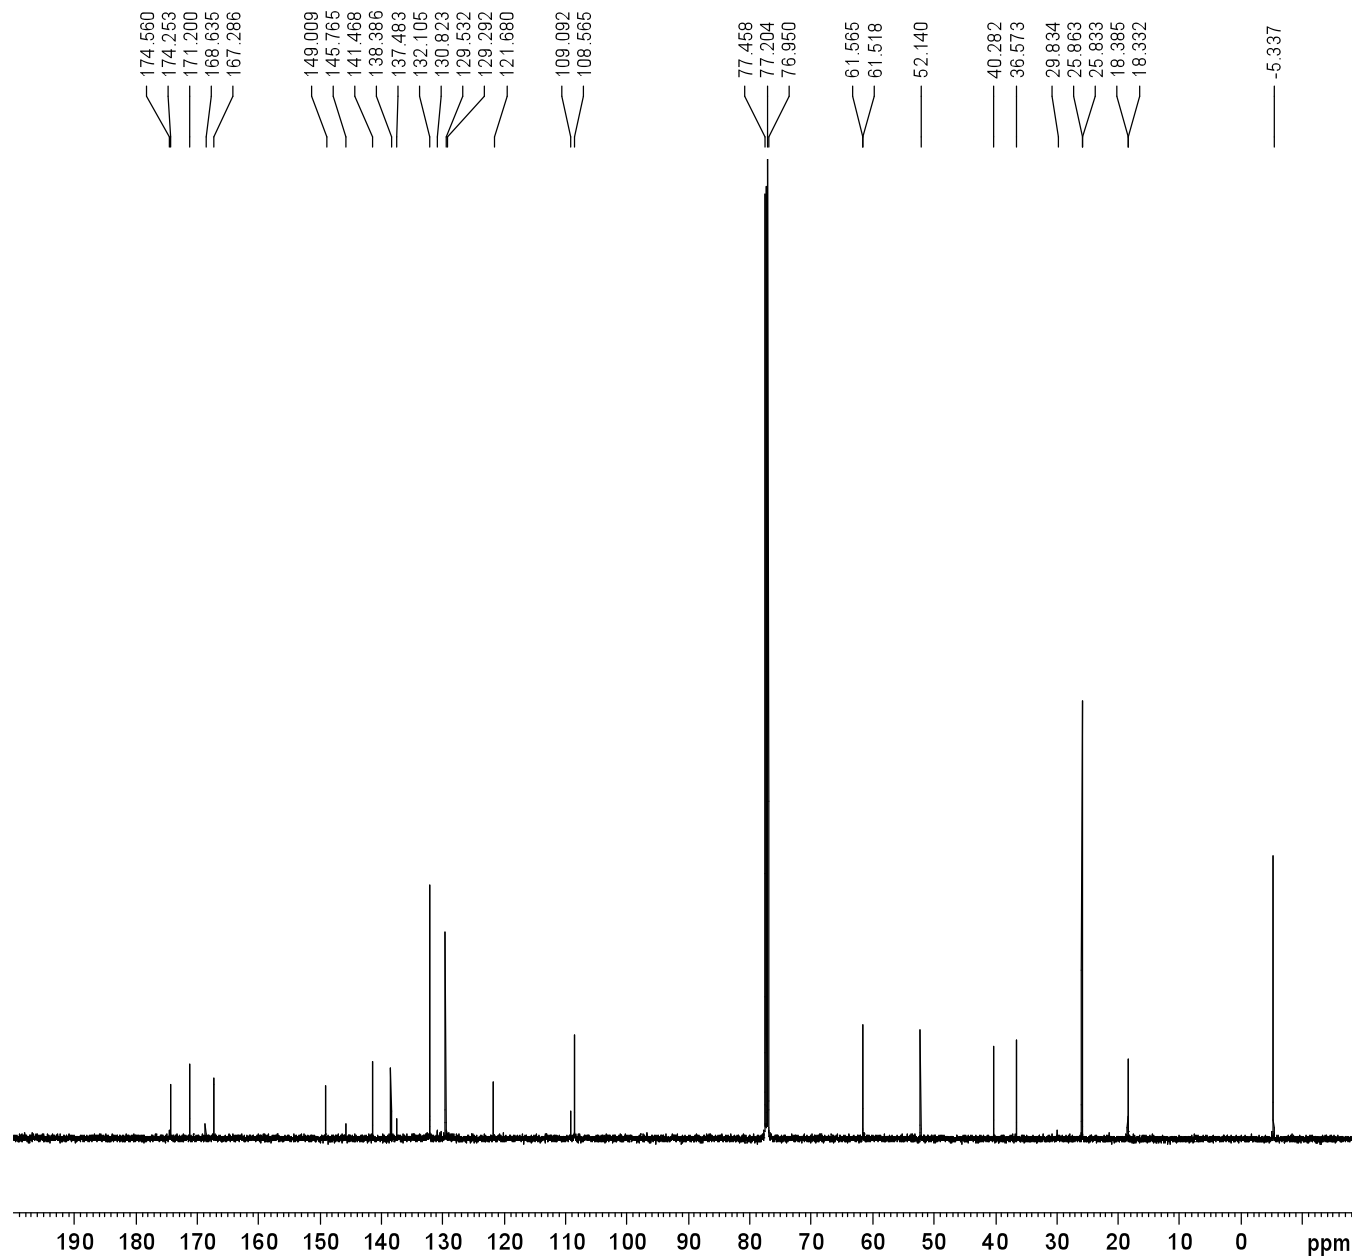

```

Current Data Parameters
NAME      I-JM-65carbon
EXPNO    9
PROCNO   1

F2 - Acquisition Parameters
Date_    2009031
Time     20.32
INSTRUM  spect
PROBHD   5 mm PABBO BB-
PULPROG  zgpg30
TD       65536
SOLVENT  CDCl3
NS       276
DS       4
SWH      25761.904 Hz
FIDRES   0.454131 Hz
AQ       1.1010548 sec
RG       1290
DW       16.000 usec
DE       6.50 usec
TE       298.2 K
D1       2.0000000 sec
d11      0.0300000 sec
DELTA    1.0595959 sec
TD0      1

===== CHANNEL f1 =====
NUC1      13C
P1       7.50 usec
PL1      1.00 dB
SFO1     125.8357479 MHz

===== CHANNEL f2 =====
CPDPRG2  waltz16
NUC2      1H
PCPD2    80.00 usec
PL12     17.43 dB
PL13     18.43 dB
PL2      0.00 dB
SFO2     500.13520016 MHz

F2 - Processing parameters
SI       32768
SF       125.8231500 MHz
WDW      EM
SSB      0
LB       1.00 Hz
GB       0
PC       1.40
    
```



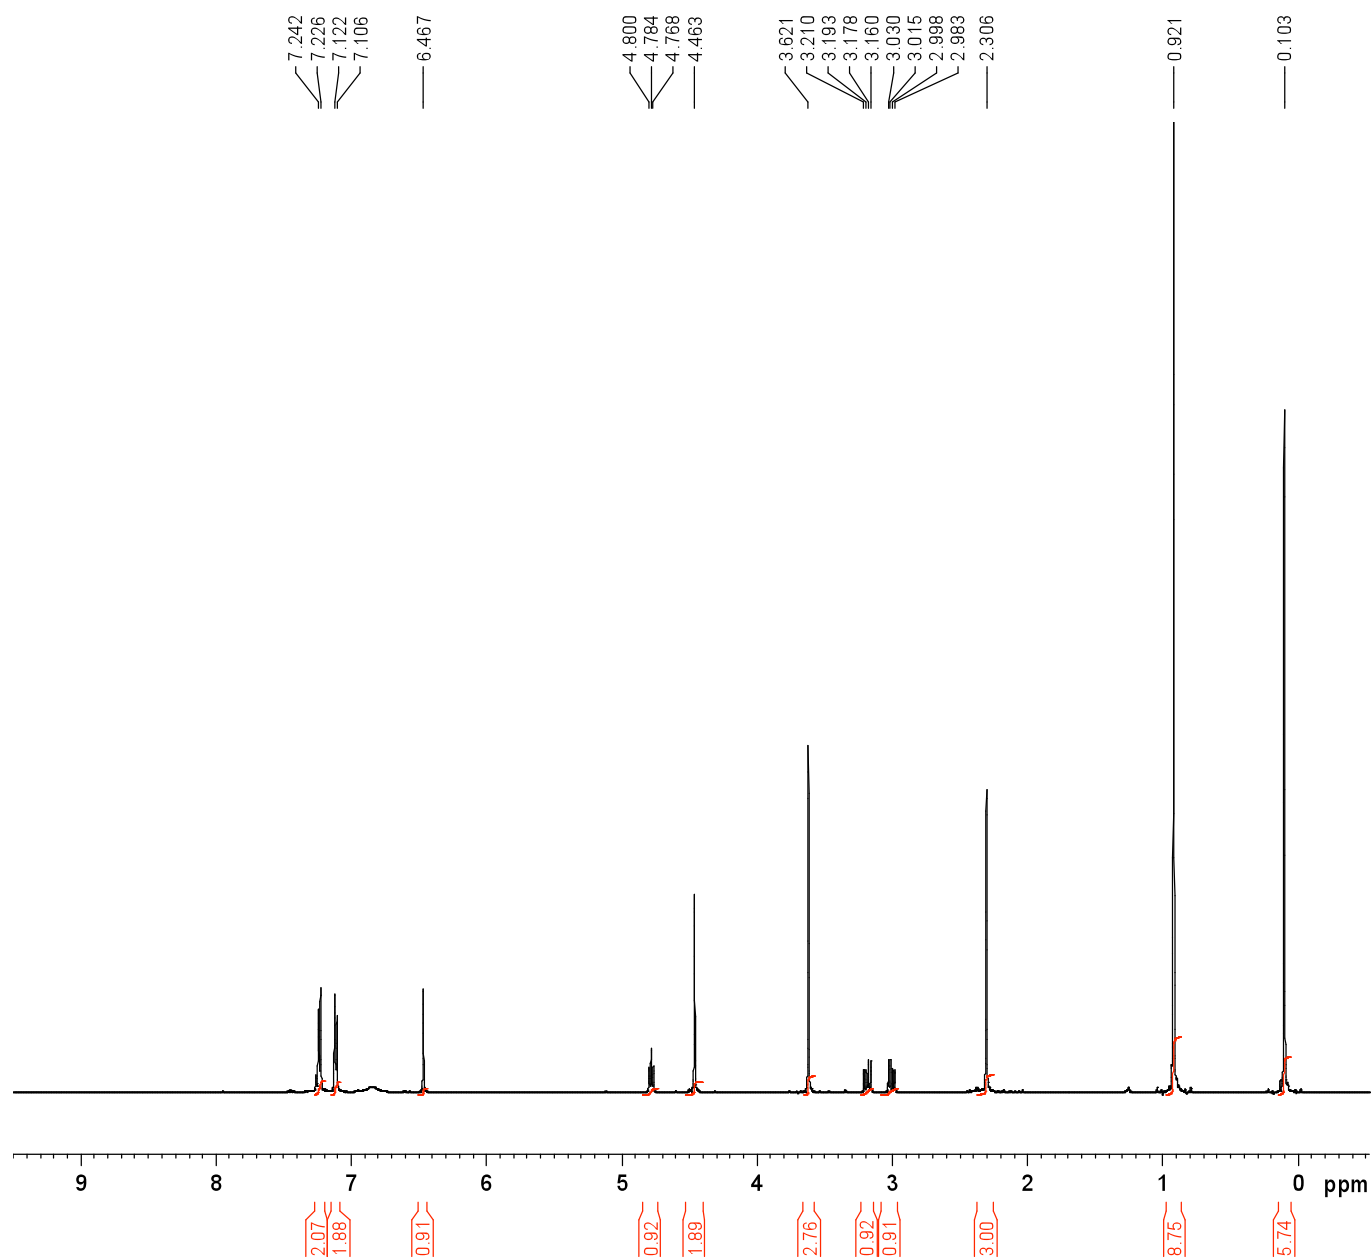

```

Current Data Parameters
NAME          V97
EXPNO         1
PROCNO        1

F2 - Acquisition Parameters
Date_         20090903
Time          13.14
INSTRUM       spect
PROBHD        5 mm PABBO BB-
PULPROG       zg30
TD            65536
SOLVENT       CDCl3
NS            15
DS            2
SWH           7002.801 Hz
FIDRES        0.106854 Hz
AQ            4.6793203 sec
RG            80.6
DW            71.400 usec
DE            6.50 usec
TE            297.3 K
D1            1.00000000 sec
TDO           1

===== CHANNEL f1 =====
NUC1           1H
P1             10.76 usec
PL1            0.00 dB
SF01           500.3932525 MHz

F2 - Processing parameters
SI             32768
SF             500.3900160 MHz
WDW            EM
SSB            0
LB             0.30 Hz
GB             0
PC             1.00

```

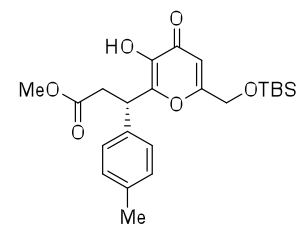**6**



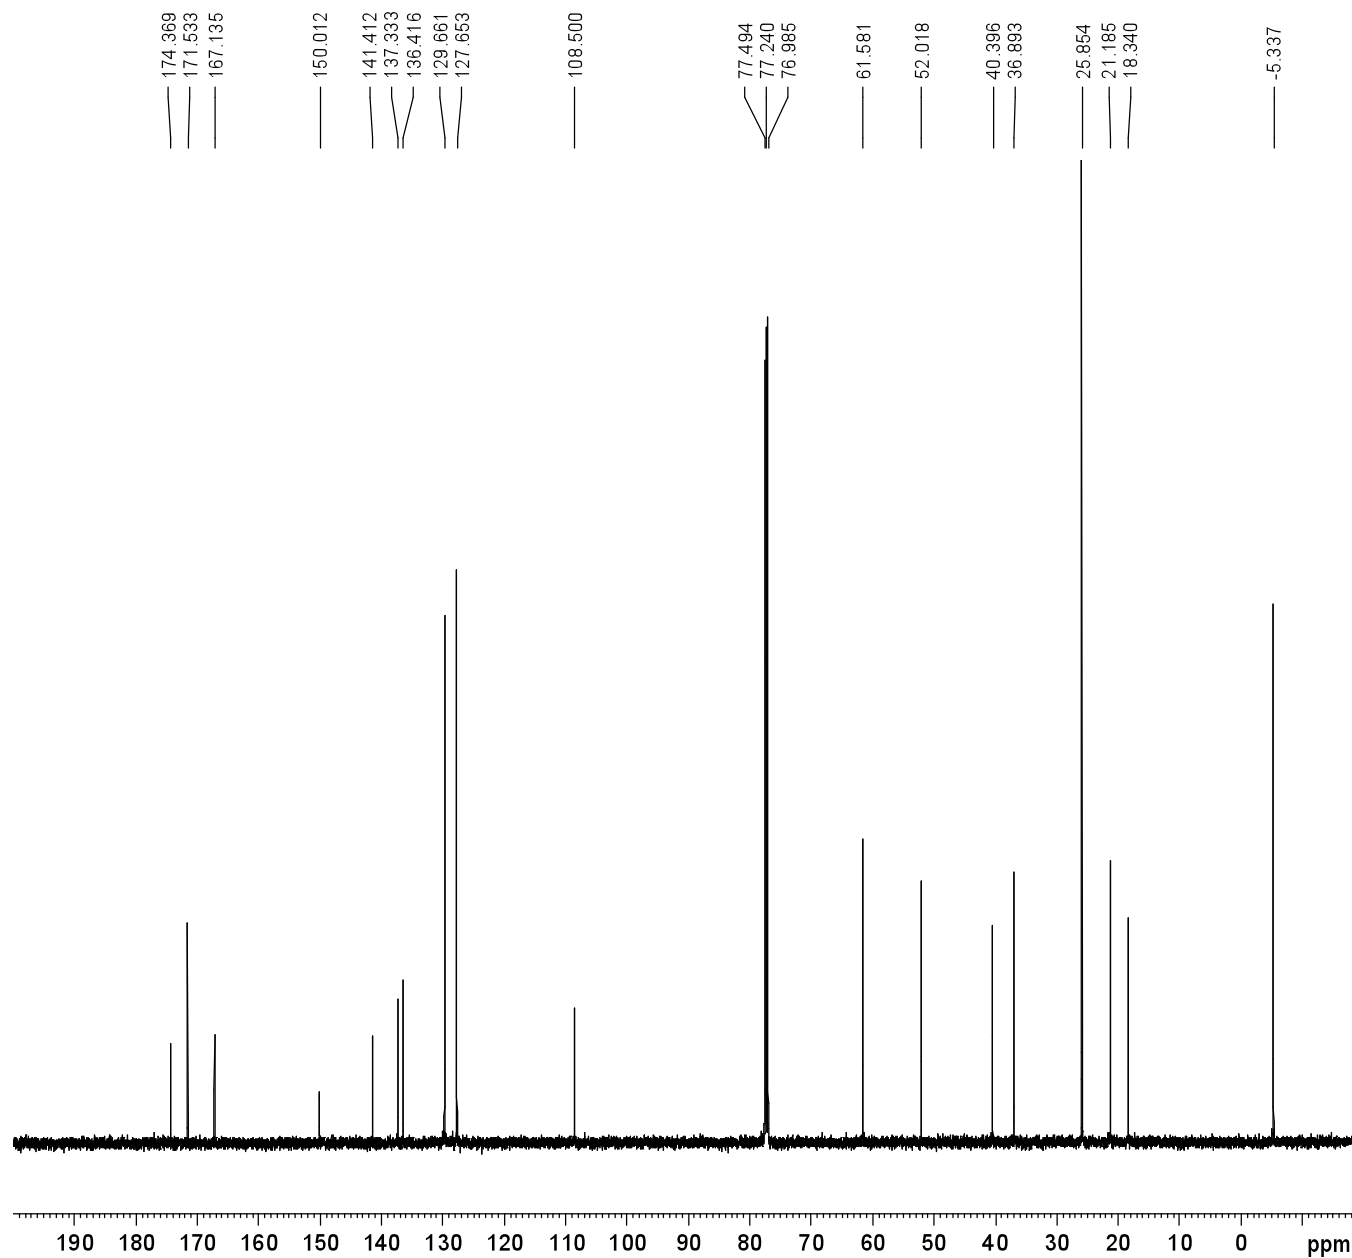

```

Current Data Parameters
NAME      V57:carbon
EXPNO    1
PROCNO   1

F2 - Acquisition Parameters
Date_    20090227
Time     18.09
INSTRUM  spect
PROBHD   5 mm PABBO BB-
PULPROG  zgpg30
TD       65536
SOLVENT  CDCl3
NS       115
DS       4
SWH      25761.904 Hz
FIDRES   0.454131 Hz
AQ       1.1010548 sec
RG       1030
DW       16.800 usec
DE       6.50 usec
TE       298.5 K
D1       2.0000000 sec
d11      0.0300000 sec
DELTA    1.0555558 sec
TDO      1

===== CHANNEL f1 =====
NUC1      13C
P1        7.50 usec
PL1       1.00 dB
SFO1     125.8357479 MHz

===== CHANNEL f2 =====
CPDPRG2  waltz16
NUC2      1H
PCPD2     80.00 usec
PL12     17.43 dB
PL13     18.43 dB
PL2      0.00 dB
SFO2     500.3520016 MHz

F2 - Processing parameters
SI        32768
SF        125.8231500 MHz
WDW       EM
SSB       0
LB        1.00 Hz
GB        0
PC        1.40
    
```

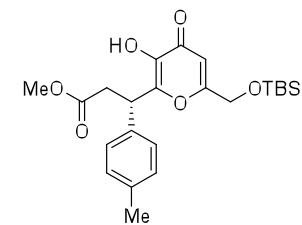

6

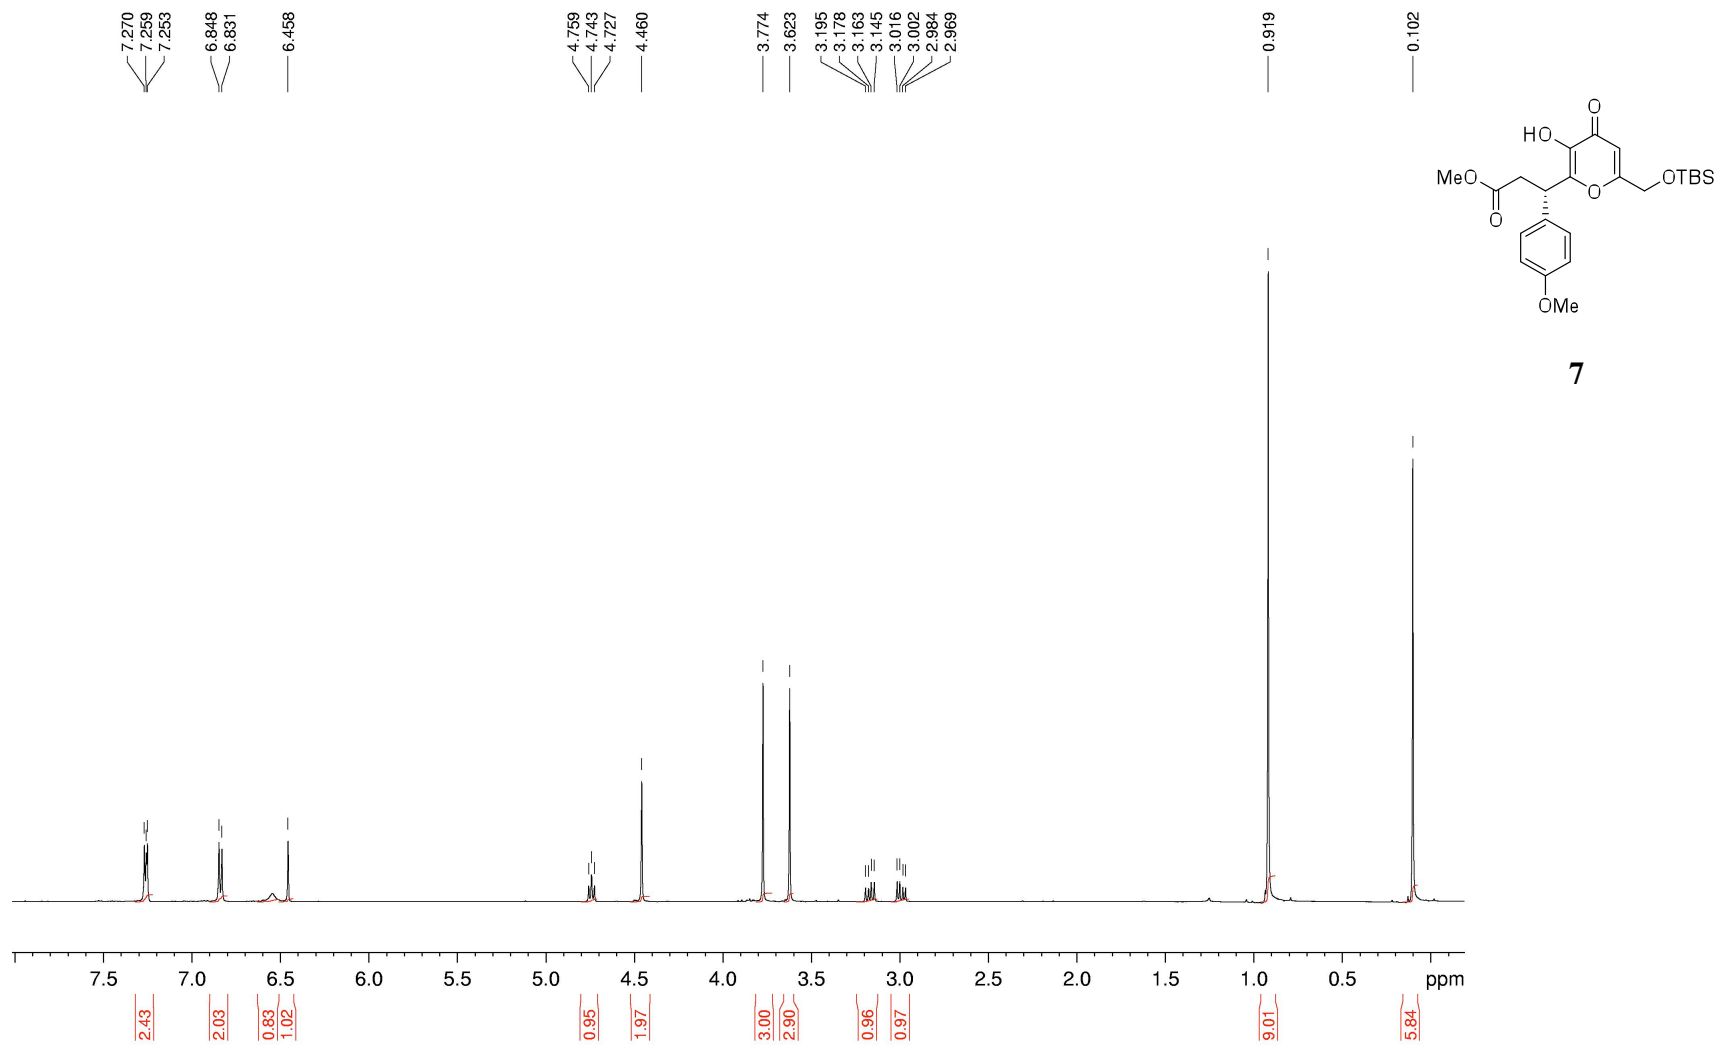

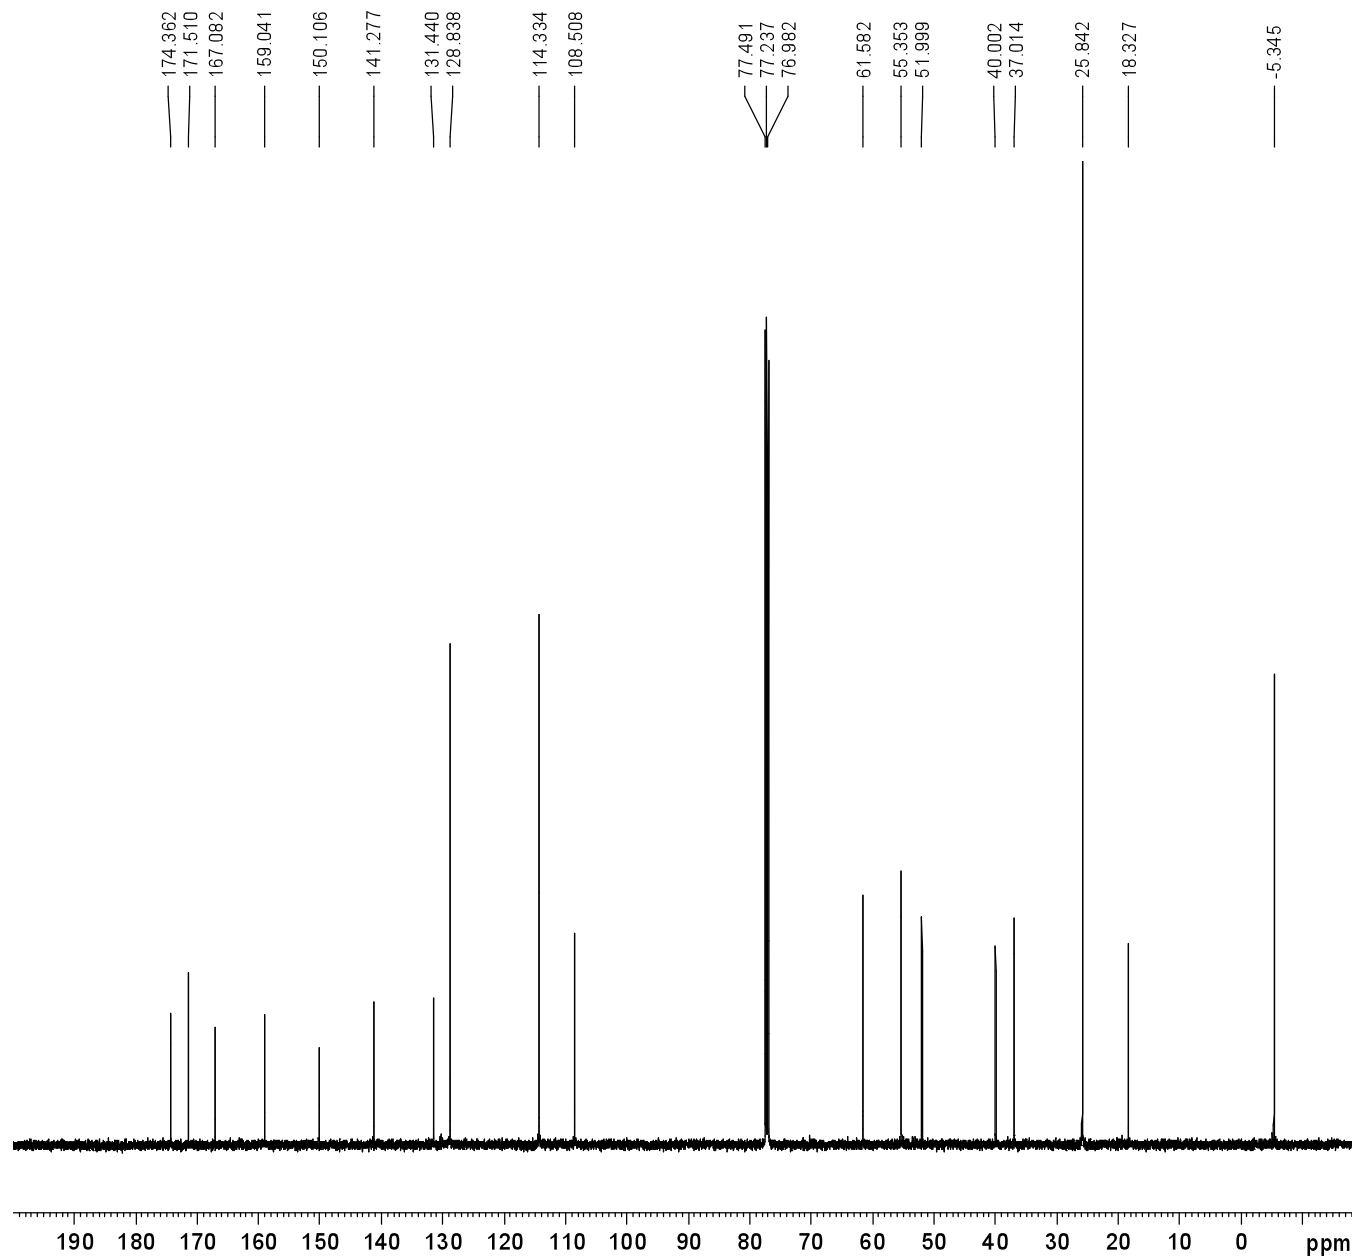

```

Current Data Parameters
NAME      V86carbon
EXPNO    1
PROCNO   1

F2 - Acquisition Parameters
Date_    20090921
Time     18.01
INSTRUM  spect
PROBHD   5 mm PABBO BB-
PULPROG  zgpg30
TD       65536
SOLVENT  cdcl3
HS       123
DS       4
SWH      29761.904 Hz
FIDRES   0.454131 Hz
AQ       1.1010568 sec
RG       1620
DW       16.800 usec
DE       6.50 usec
TE       298.7 K
D1       2.0000000 sec
d11      0.0200000 sec
DELTA    1.89999998 sec
TD0      1

===== CHANNEL f1 =====
NUC1      13C
P1       7.50 usec
PL1      1.00 dB
SFO1     125.82357475 MHz

===== CHANNEL f2 =====
CPDPRG2  waltz16
NUC2      1H
PCPD2    80.00 usec
PL12     17.43 dB
PL13     18.43 dB
PL2      0.00 dB
SFO2     500.3520016 MHz

F2 - Processing parameters
SI        32768
SF        125.8231500 MHz
WDW       EM
SSB       0
LB        1.00 Hz
GB        0
PC        1.40
    
```

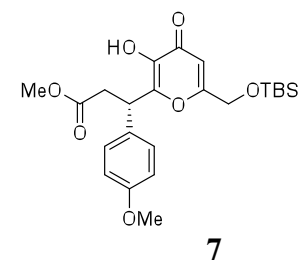

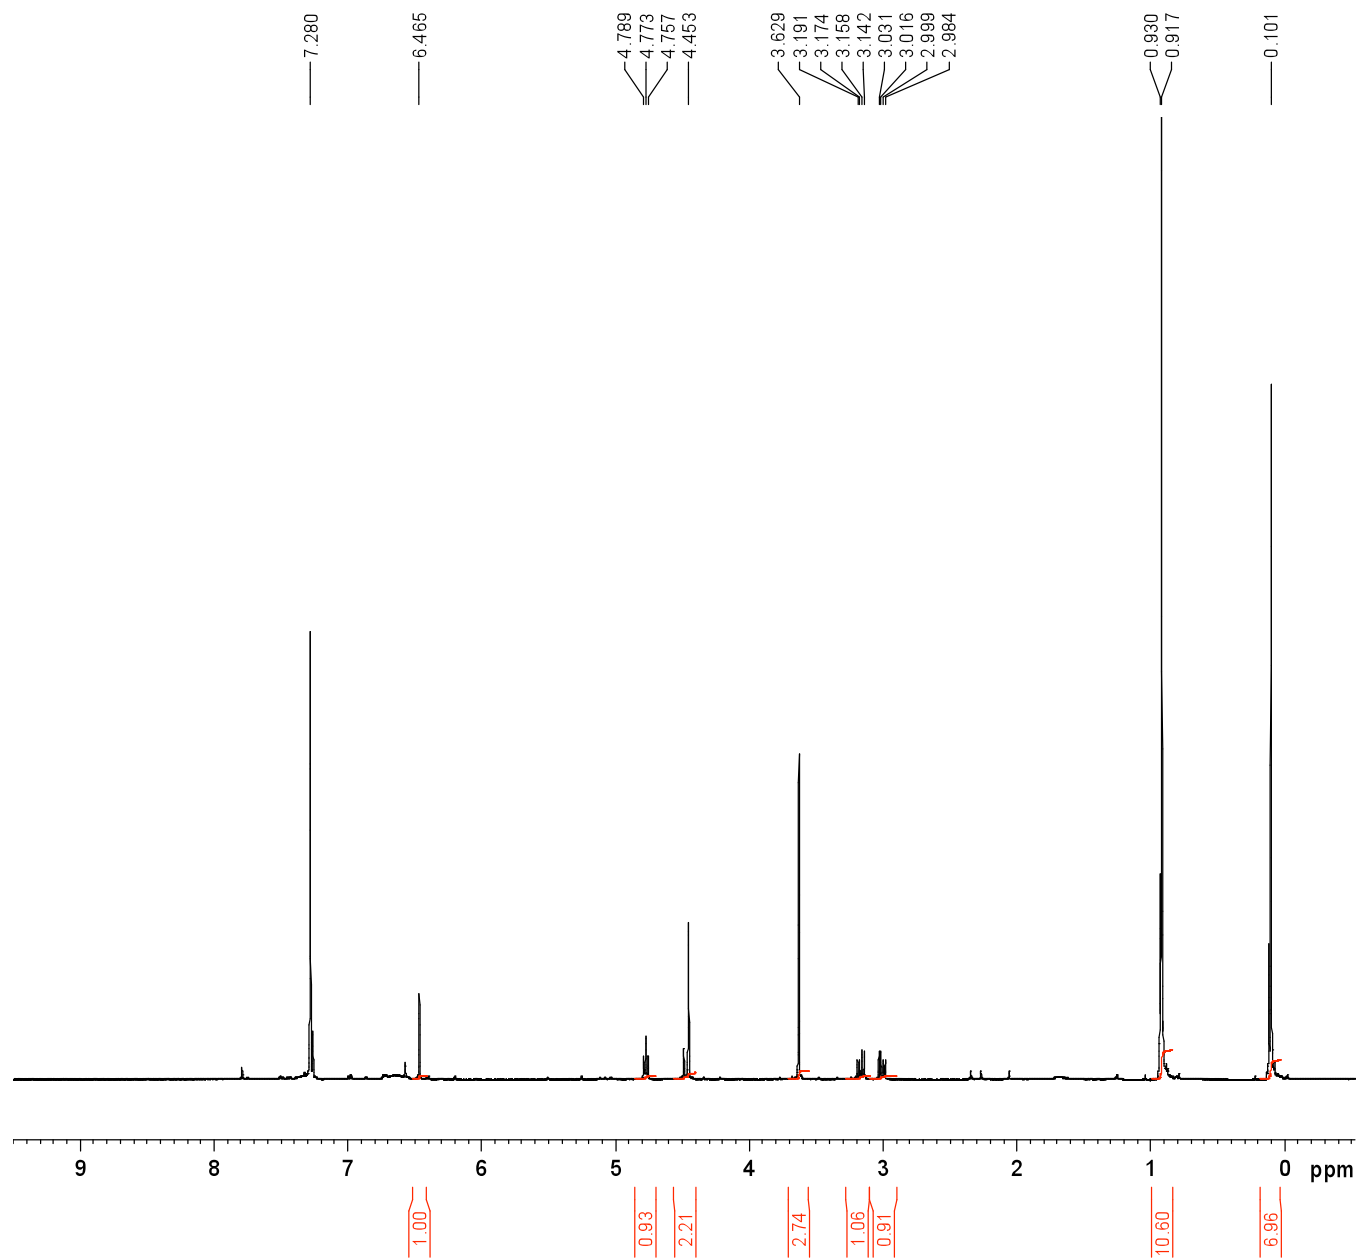

```

Current Data Parameters
NAME          Vpchloro
EXPNO        3
PROCNO       1

F2 - Acquisition Parameters
Date_        20091013
Time         19.31
INSTRUM      spect
PROBHD       5 mm PABBO BB-
PULPROG      zg30
TD           65536
SOLVENT      CDCl3
NS           10
DS           2
SWH          7002.801 Hz
FIDRES       0.106854 Hz
AQ           4.6793203 sec
RG           203
DW           71.400 usec
DE           6.50 usec
TE           298.4 K
D1           1.00000000 sec
TDO         1

===== CHANNEL f1 =====
NUC1         1H
P1           10.76 usec
PL1          0.00 dB
SF01         500.3932525 MHz

F2 - Processing parameters
SI           32768
SF           500.3900160 MHz
WDW          EM
SSB          0
LB           0.30 Hz
GB           0
PC           1.00
    
```

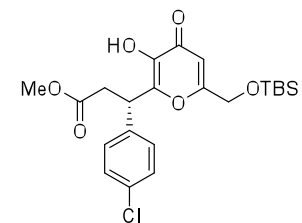

8

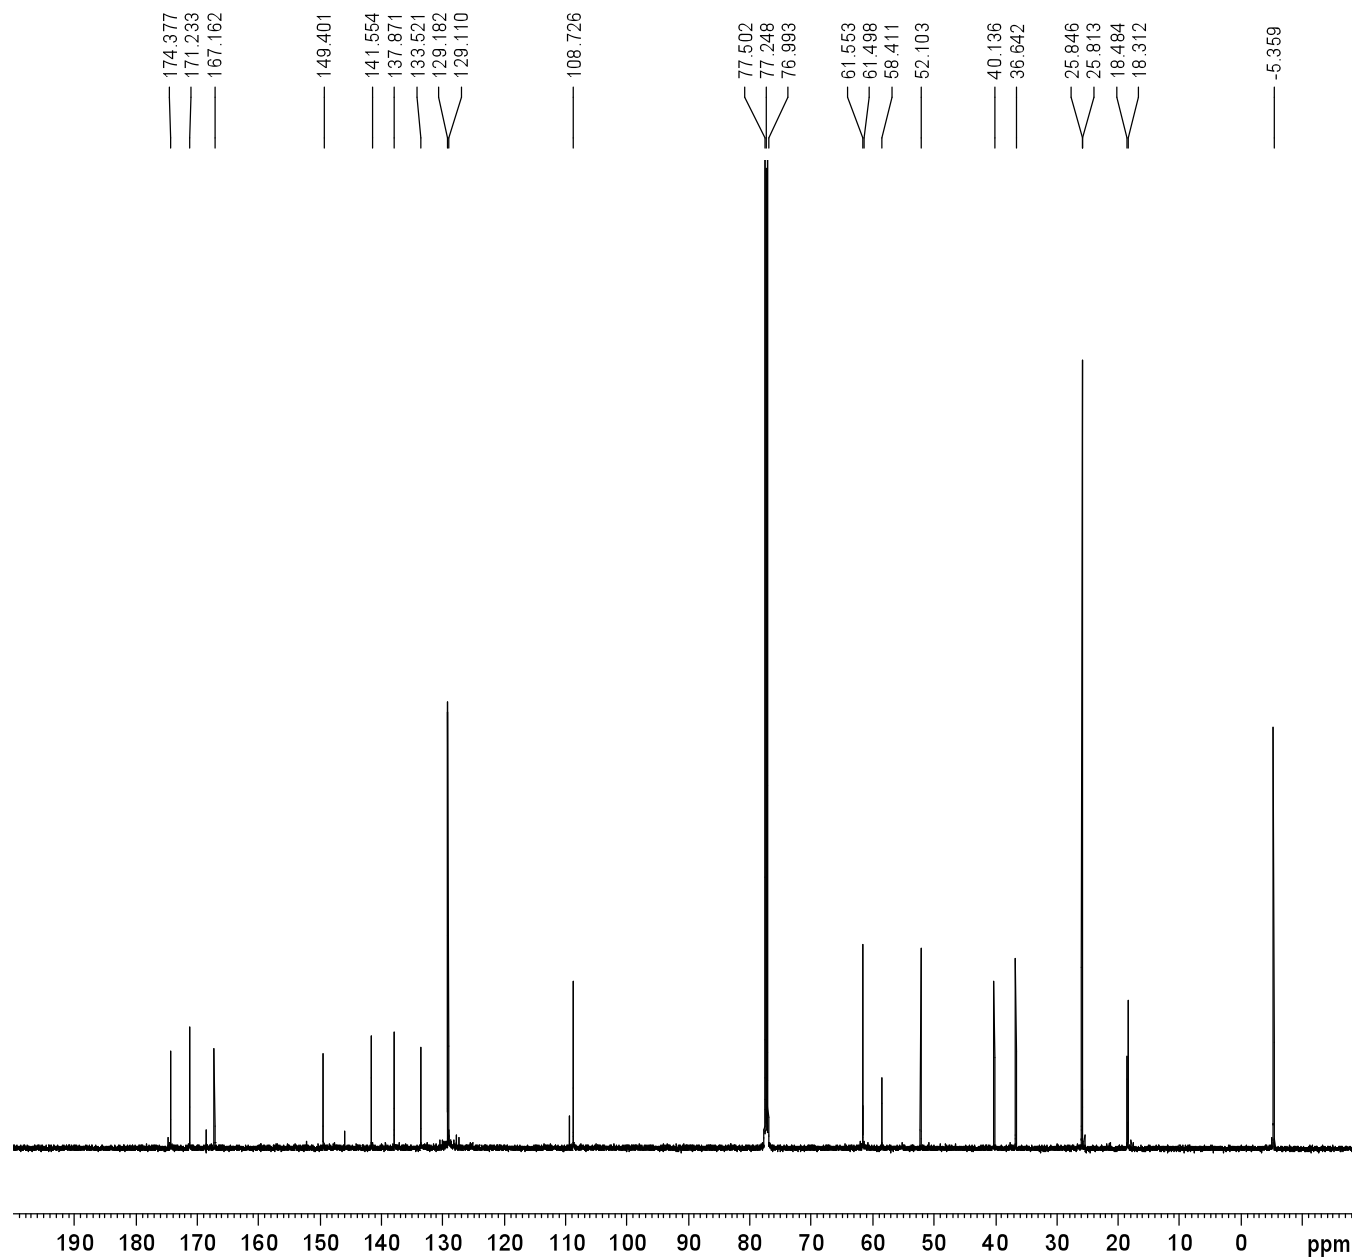

```

Current Data Parameters
NAME      Up-chloroCarbon
EXPNO    2
PROCNO   1

F2 - Acquisition Parameters
Date_    2009022
Time     12.03
INSTRUM  spect
PROBHD   5 mm PABBO BB-
PULPROG  zgpg30
TD       65536
SOLVENT  CDCl3
NS       502
DS       4
SWH      25761.904 Hz
FIDRES   0.454131 Hz
AQ       1.1010548 sec
RG       456
DW       16.000 usec
DE       6.50 usec
TE       298.7 K
D1       2.0000000 sec
d11      0.0300000 sec
DELTA    1.0555558 sec
TD0      1

===== CHANNEL f1 =====
NUC1      13C
P1       7.50 usec
PL1      1.00 dB
SFO1     125.8357479 MHz

===== CHANNEL f2 =====
CPDPRG2  waltz16
NUC2      1H
PCPD2     80.00 usec
PL12     17.43 dB
PL13     18.43 dB
PL2      0.00 dB
SFO2     500.3520016 MHz

F2 - Processing parameters
SI       22768
SF       125.8231500 MHz
WDW      EM
SSB      0
LB       1.00 Hz
GB       0
PC       1.40
    
```

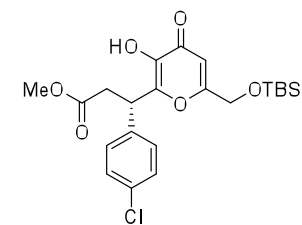

8

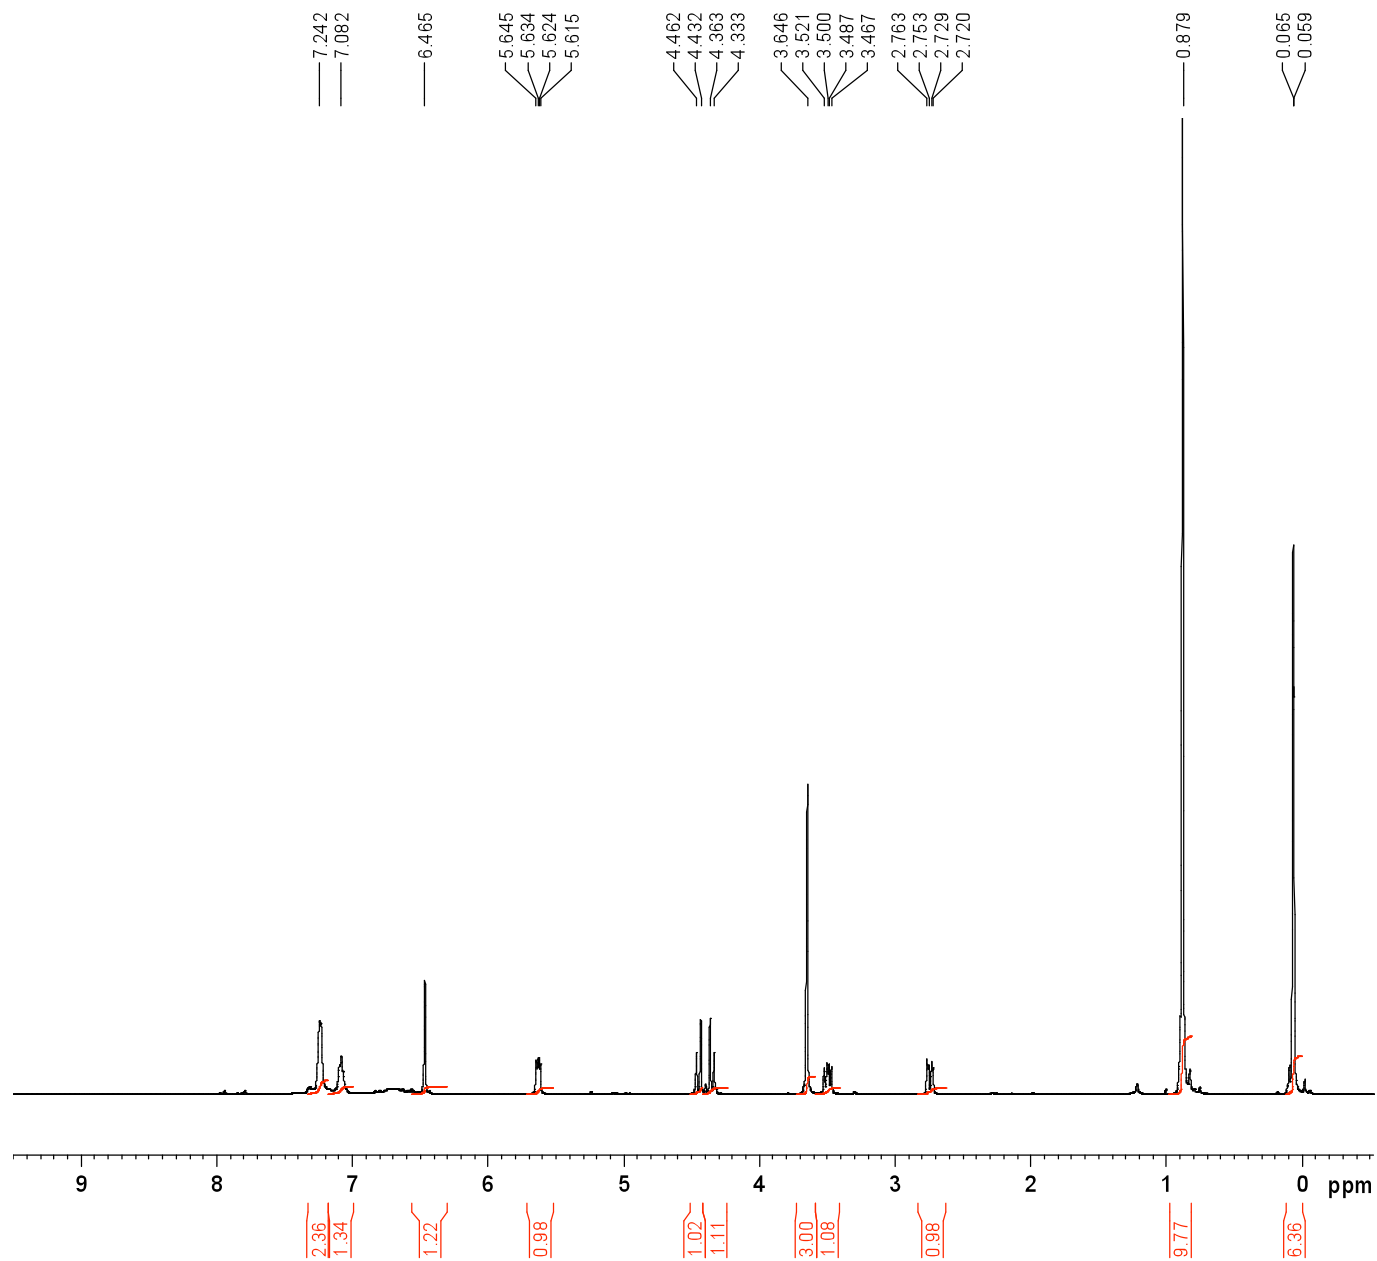

```

Current Data Parameters
NAME      I-JM-90prep
EXPNO    2
PROCNO   1

F2 - Acquisition Parameters
Date_    20090926
Time     16.20
INSTRUM  spect
PROBHD   5 mm PABBO BB-
PULPROG  zg30
TD        65536
SOLVENT  CDCl3
NS        16
DS        2
SWH       7002.801 Hz
FIDRES    0.106854 Hz
AQ        4.6793203 sec
RG        36
DW        71.400 usec
DE        6.50 usec
TE        298.2 K
D1        1.00000000 sec
TD0       1

===== CHANNEL f1 =====
NUC1      1H
P1        10.76 usec
PL1       0.00 dB
SF01      500.3932525 MHz

F2 - Processing parameters
SI        32768
SF        500.3900160 MHz
WDW       EM
SSB       0
LB        0.30 Hz
GB        0
PC        1.00
    
```

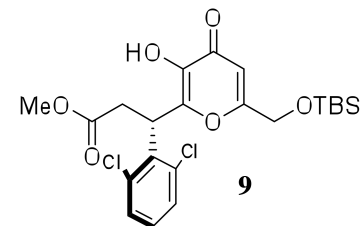

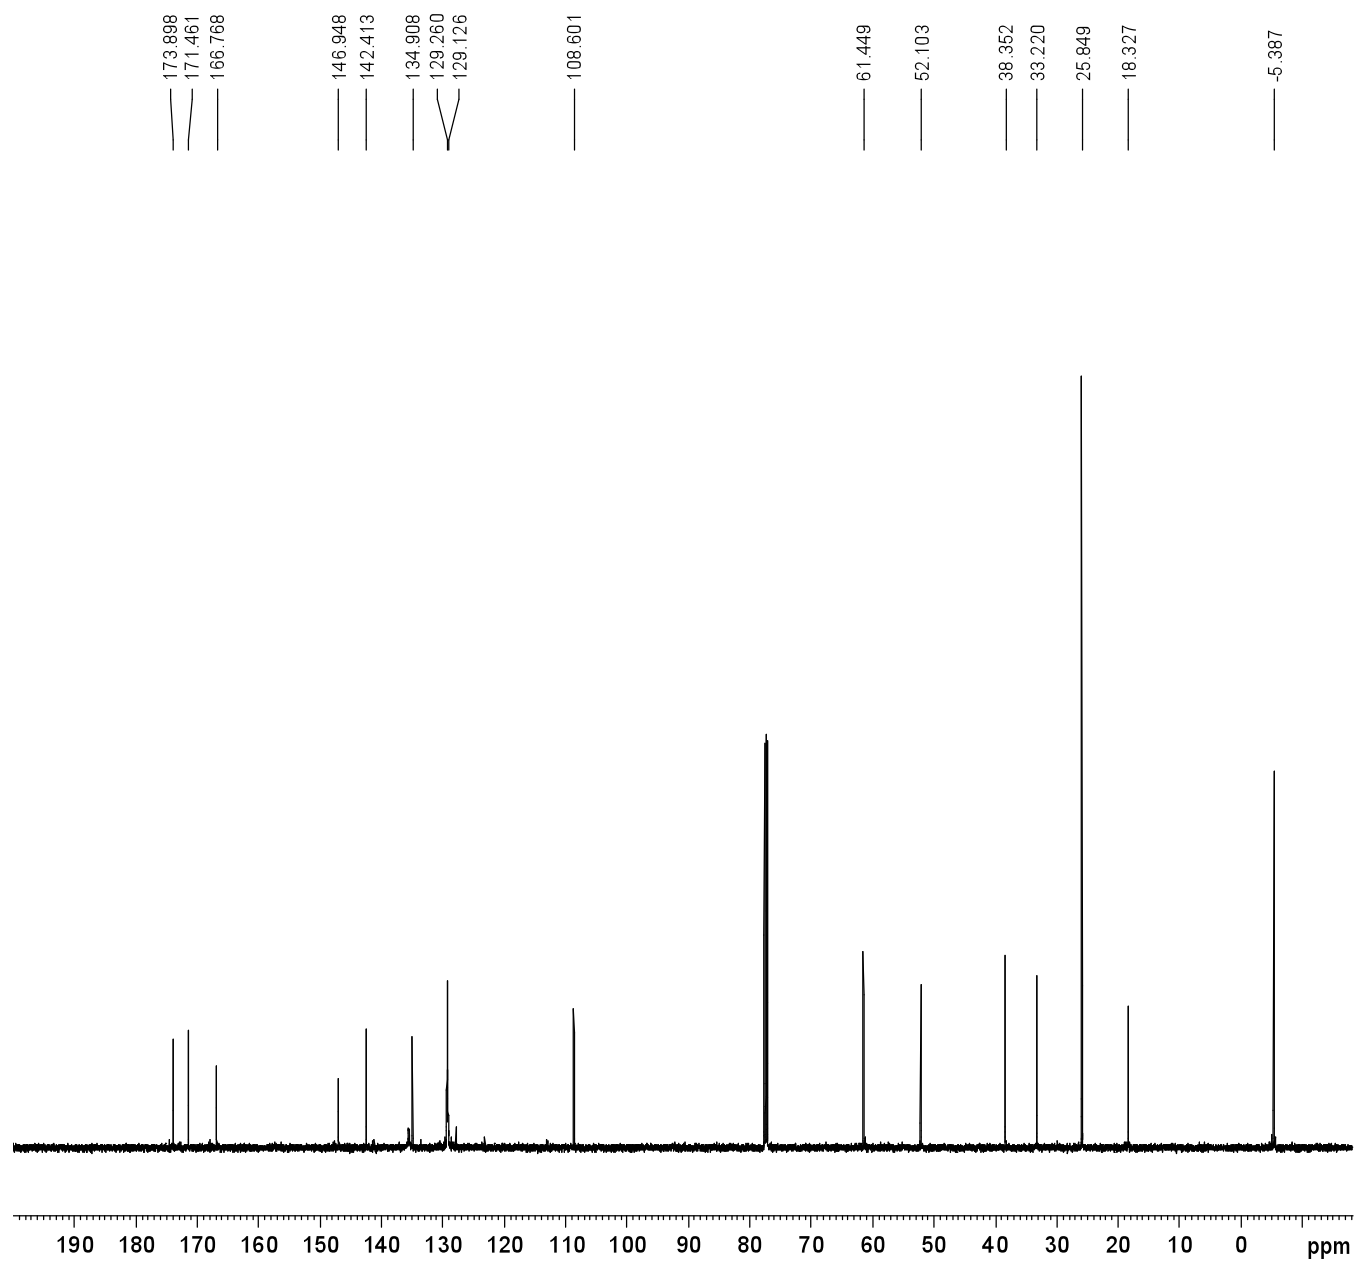

```

Current Data Parameters
NAME      1-JK-50prepC
EXPNO    2
PROCNO   1

F2 - Acquisition Parameters
Date_    20090226
Time     16.23
INSTRUM  spect
PROBHD   5 mm PABBO BB-
PULPROG  zgpg30
TD       65536
SOLVENT  CDCl3
NS       67
DS       4
SWH      25761.904 Hz
FIDRES   0.454131 Hz
AQ       1.1010548 sec
RG       2050
DW       16.8000 usec
DE       6.50 usec
TE       298.6 K
D1       2.00000000 sec
d11      0.03000000 sec
DELTA    1.05555550 sec
TDO      1

===== CHANNEL f1 =====
NUC1      13C
P1       7.50 usec
PL1      1.00 dB
SFO1     125.8357479 MHz

===== CHANNEL f2 =====
CPDPRG2  waltz16
NUC2      1H
PCPD2     80.00 usec
PL12     17.43 dB
PL13     18.43 dB
PL2      0.00 dB
SFO2     500.3520016 MHz

F2 - Processing parameters
SI       32768
SF       125.8231500 MHz
WDW      EM
SSB      0
LB       1.00 Hz
GB       0
PC       1.40

```

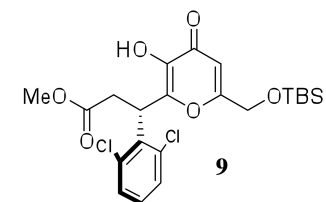

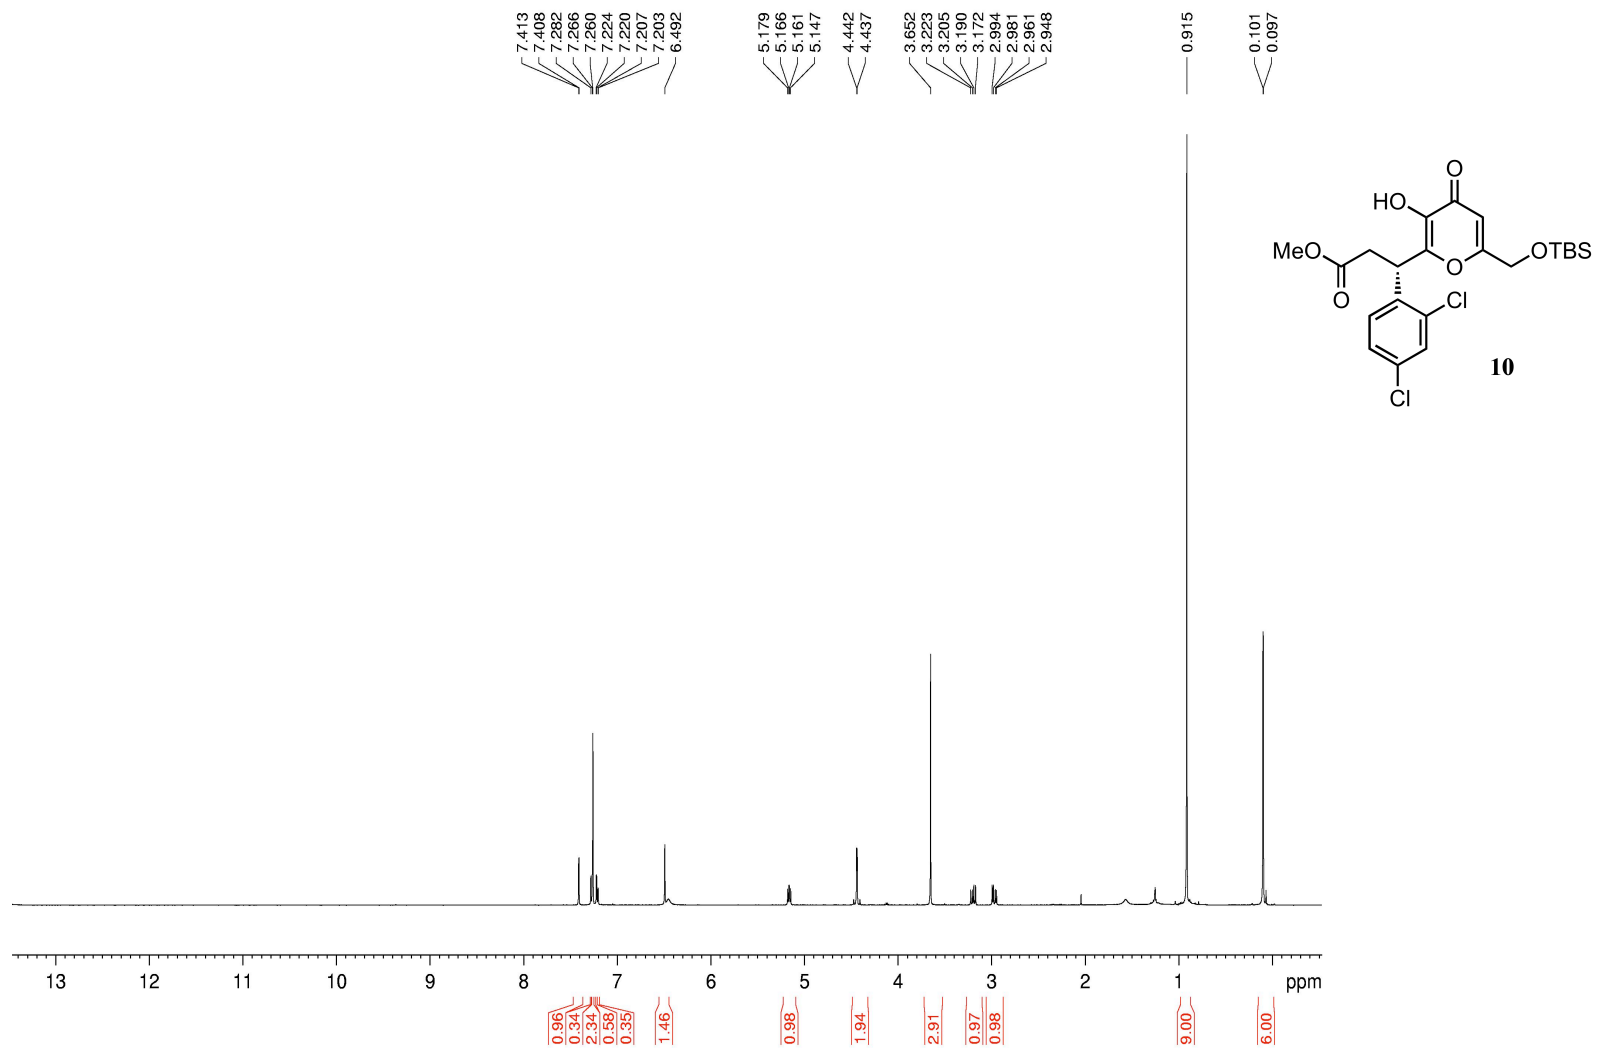



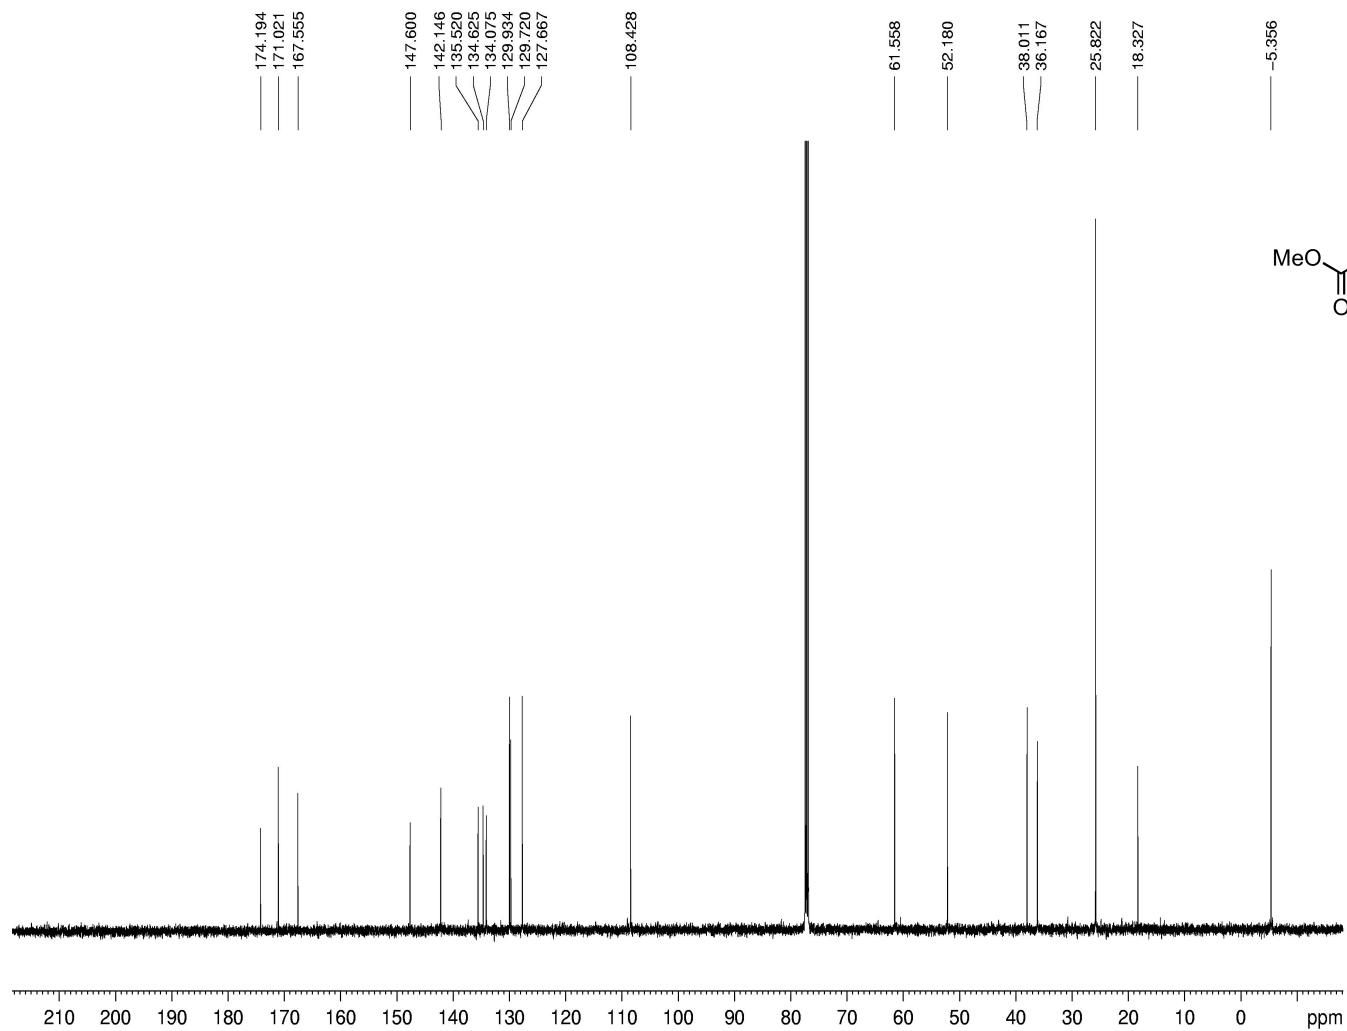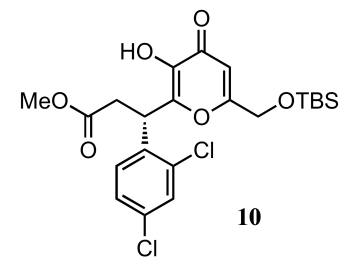

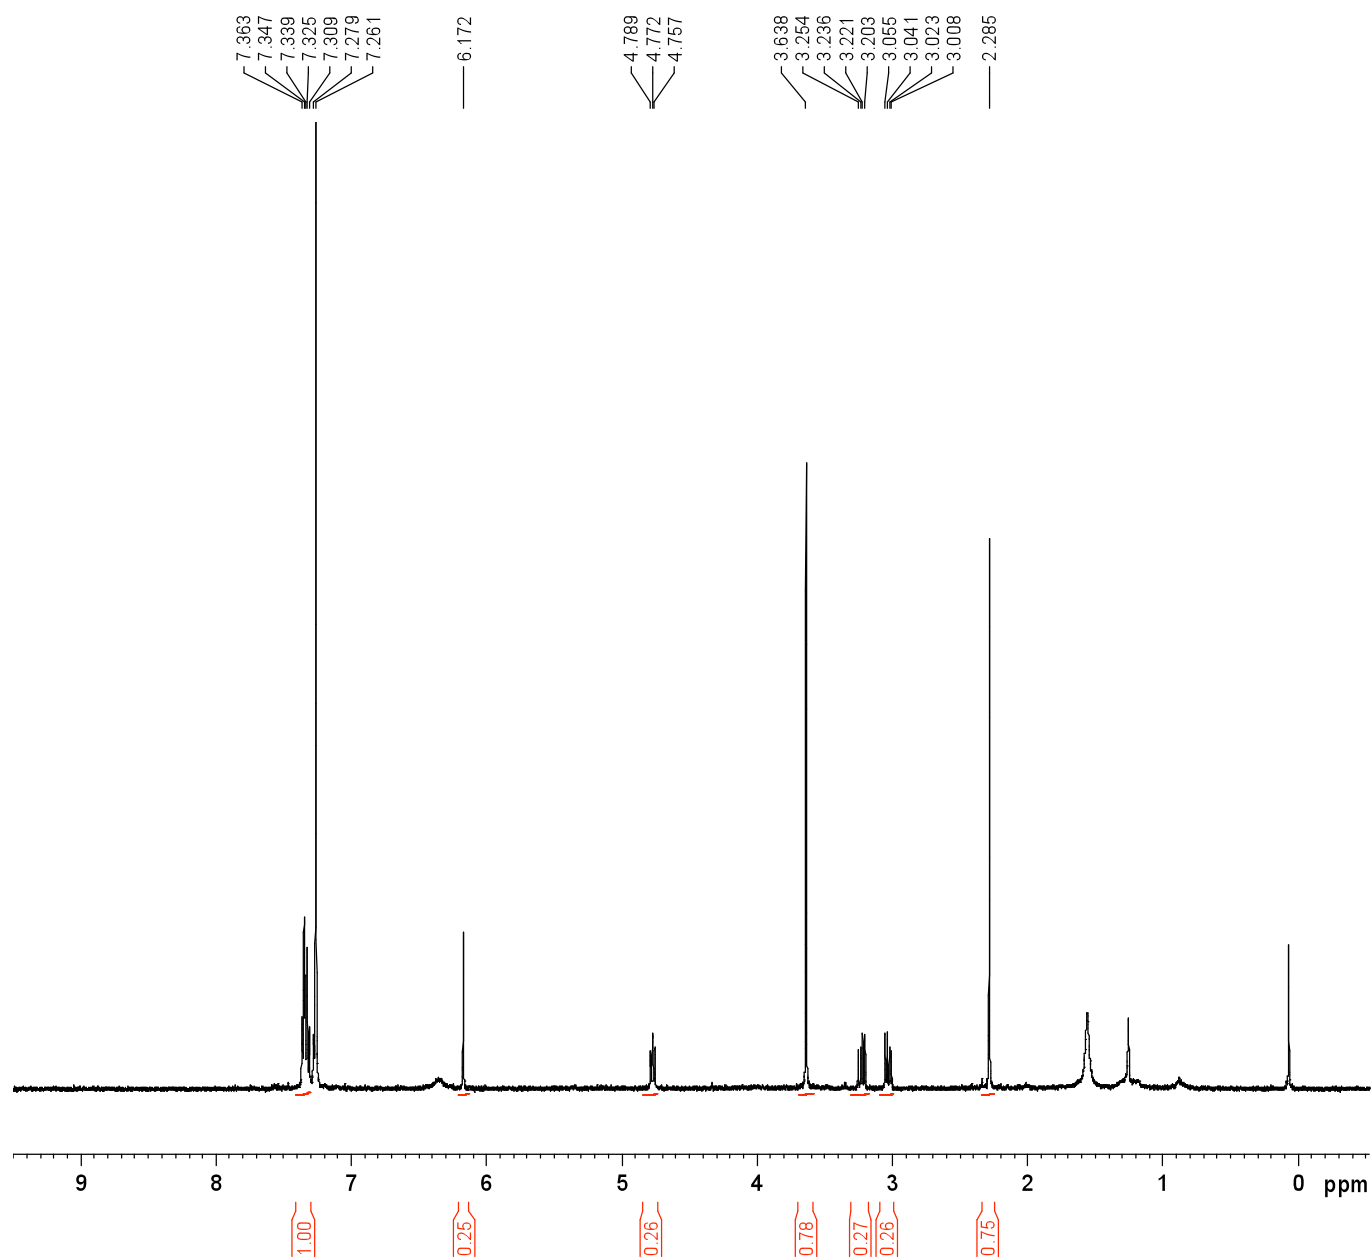

```

Current Data Parameters
NAME          V106-1
EXPNO         4
PROCNO        1

F2 - Acquisition Parameters
Date_         20090917
Time          10.52
INSTRUM       spect
PROBHD        5 mm PABBO BB-
PULPROG       zg30
TD            65536
SOLVENT       CDCl3
NS            10
DS            2
SWH           7002.801 Hz
FIDRES        0.106854 Hz
AQ            4.6793203 sec
RG            1030
DW            71.400 usec
DE            6.50 usec
TE            298.2 K
D1            1.00000000 sec
TDO           1

===== CHANNEL f1 =====
NUC1          1H
P1            10.76 usec
PL1           0.00 dB
SF01          500.3932525 MHz

F2 - Processing parameters
SI            32768
SF            500.3900160 MHz
WDW           EM
SSB           0
LB            0.30 Hz
GB            0
PC            1.00

```

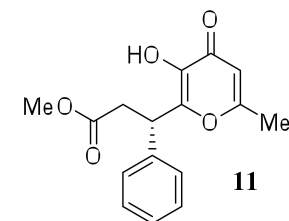

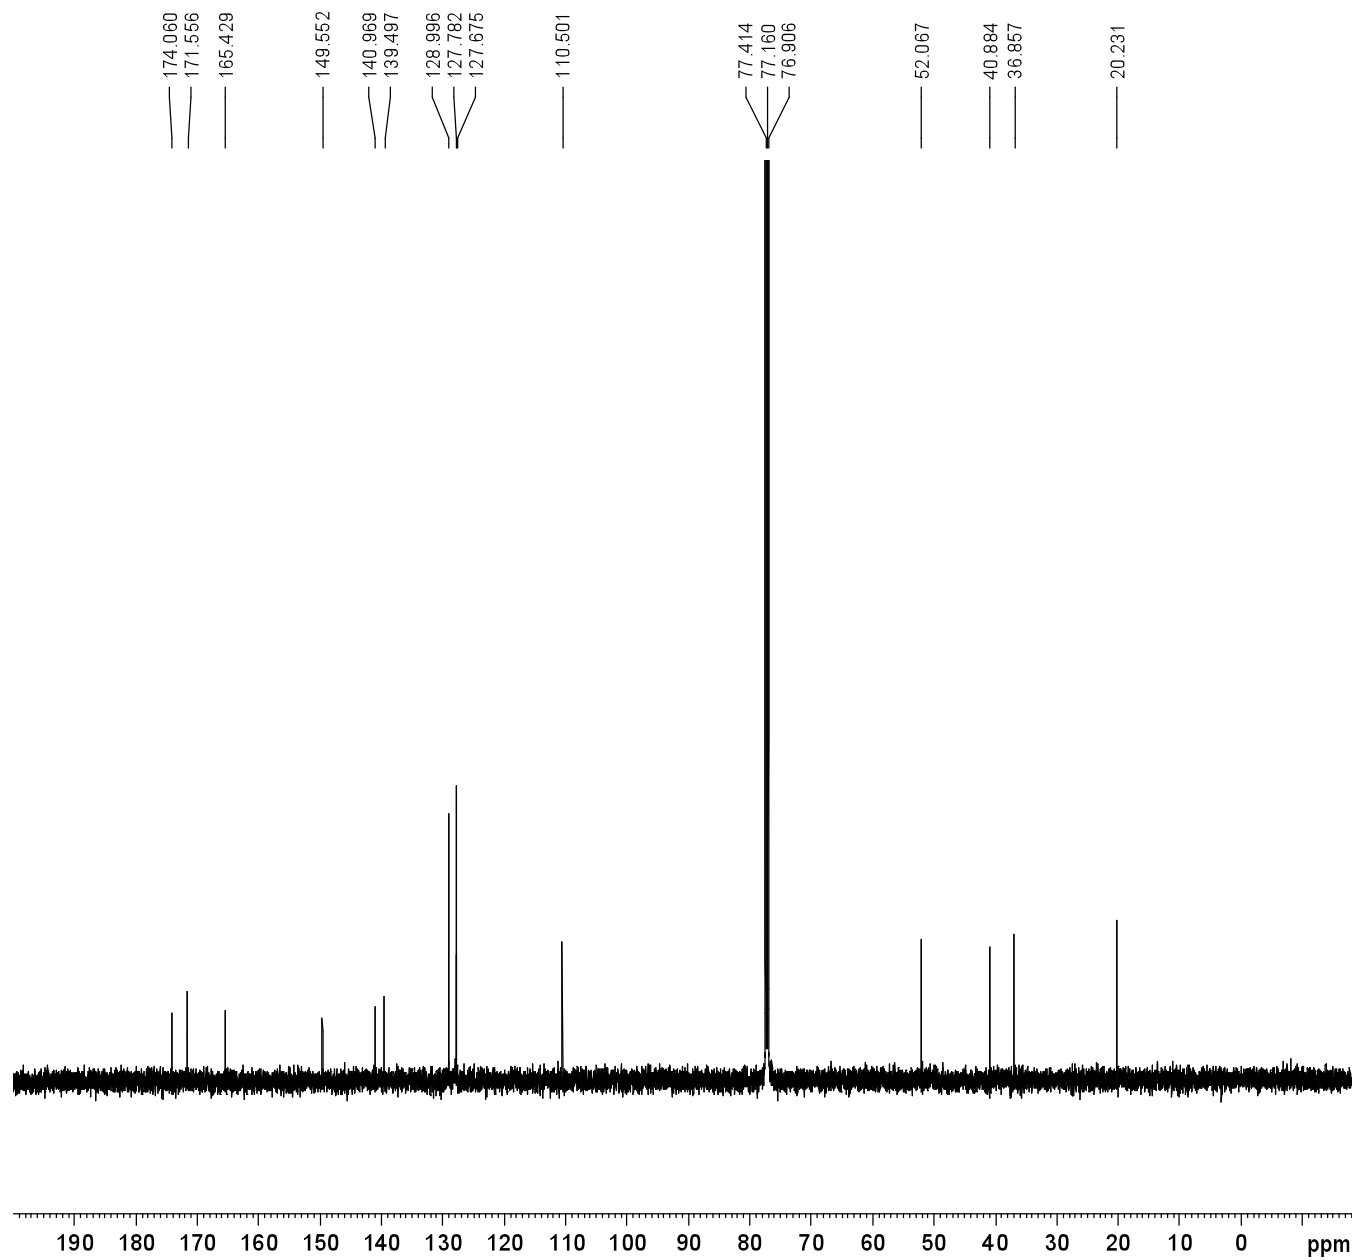

```

Current Data Parameters
NAME      W112carbon
EXPNO    2
PROCNO   1

F2 - Acquisition Parameters
Date_    20090617
Time     15.38
INSTRUM  spect
PROBHD   5 mm PABBO BB-
PULPROG  zgpg30
TD       65536
SOLVENT  CDCl3
NS       512
DS       4
SWH      25761.904 Hz
FIDRES   0.454131 Hz
AQ       1.1010348 sec
RG       1150
DW       16.800 usec
DE       6.50 usec
TE       298.3 K
D1       2.00000000 sec
d11      0.03000000 sec
DELTA    1.89595998 sec
TD0      1

===== CHANNEL f1 =====
NUC1      13C
P1       7.50 usec
PL1      1.00 dB
SFO1     125.8337475 MHz

===== CHANNEL f2 =====
CPDPRG2  waltz16
NUC2     1H
PCPD2    80.00 usec
PL12     17.43 dB
PL13     18.43 dB
PL14     0.00 dB
SFO2     500.3920016 MHz

F2 - Processing parameters
SI       32768
SF       125.8231500 MHz
WDW      EM
SSB      0
LB       1.00 Hz
GB       0
PC       1.40
    
```

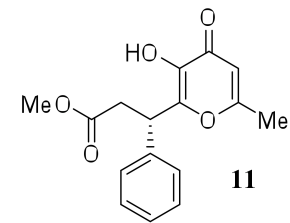

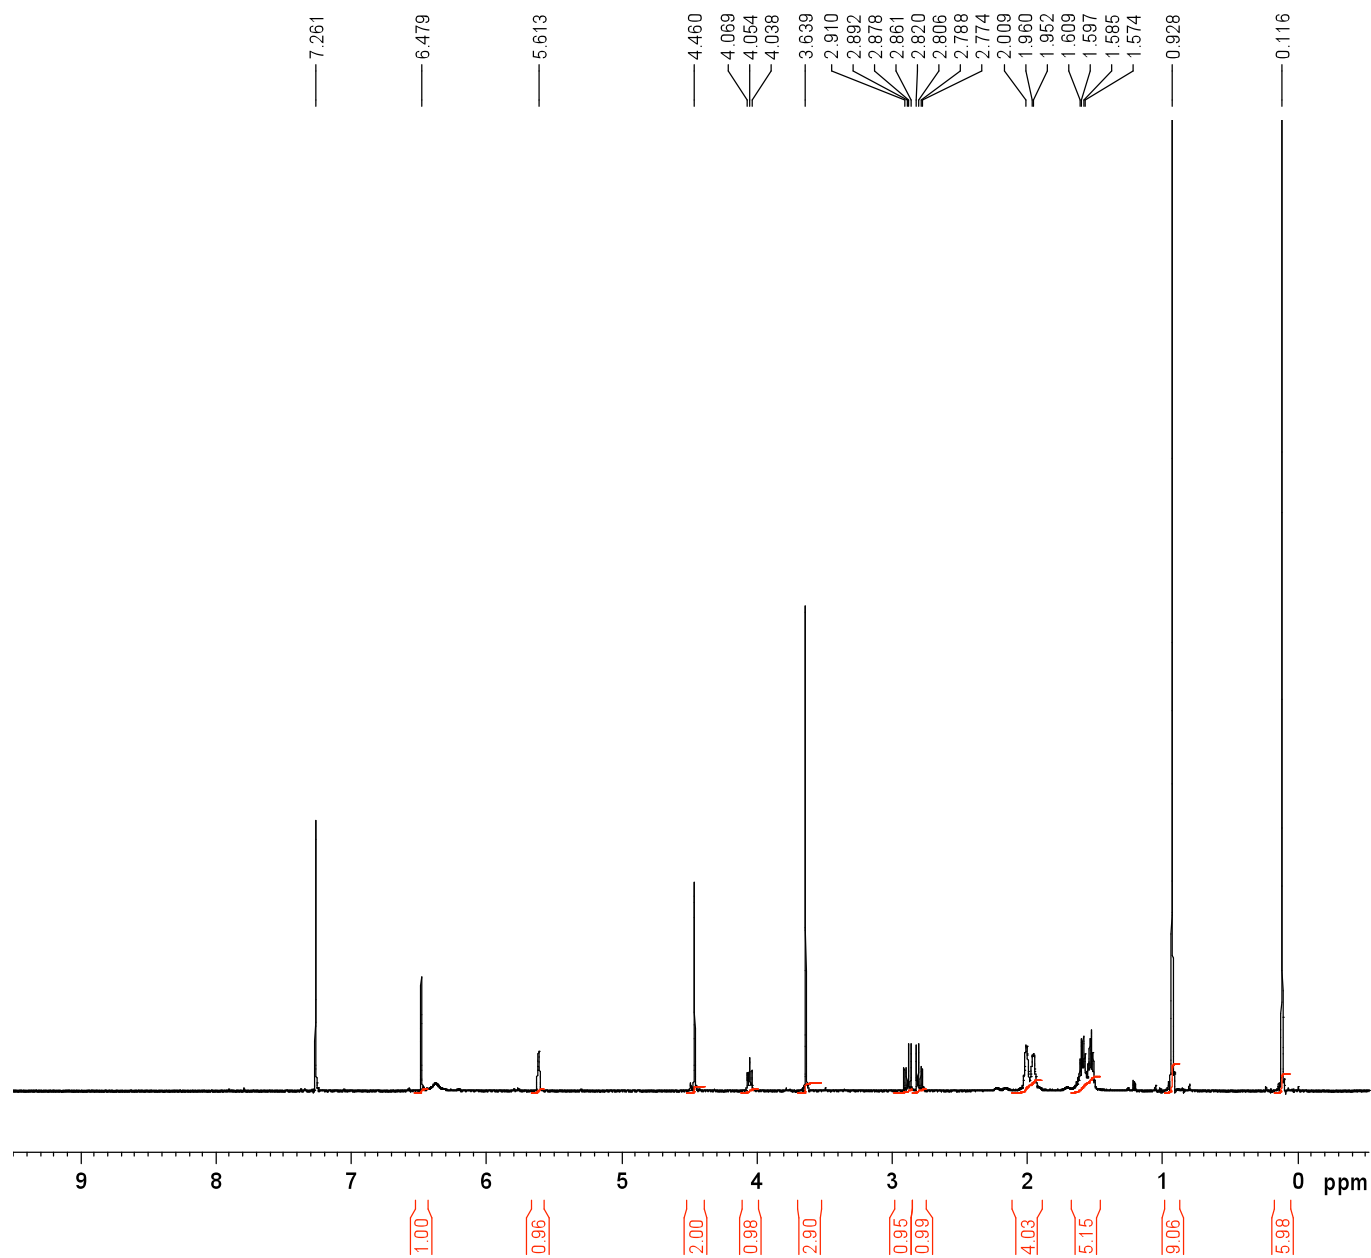

```

Current Data Parameters
NAME          V113
EXPNO         3
PROCNO        1

F2 - Acquisition Parameters
Date_         20090918
Time          10.50
INSTRUM      spect
PROBHD       5 mm PABBO BB-
PULPROG      zg30
TD            65536
SOLVENT      CDCl3
NS            15
DS            2
SWH           7002.801 Hz
FIDRES        0.106854 Hz
AQ            4.6793203 sec
RG            406
DW            71.400 usec
DE            6.50 usec
TE            298.3 K
D1            1.00000000 sec
TDO           1

===== CHANNEL f1 =====
NUC1          1H
P1            10.76 usec
PL1           0.00 dB
SFO1          500.3932525 MHz

F2 - Processing parameters
SI            32768
SF            500.3900160 MHz
WDW           EM
SSB           0
LB            0.30 Hz
GB            0
PC            1.00
    
```

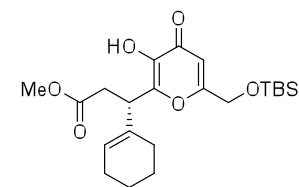

12

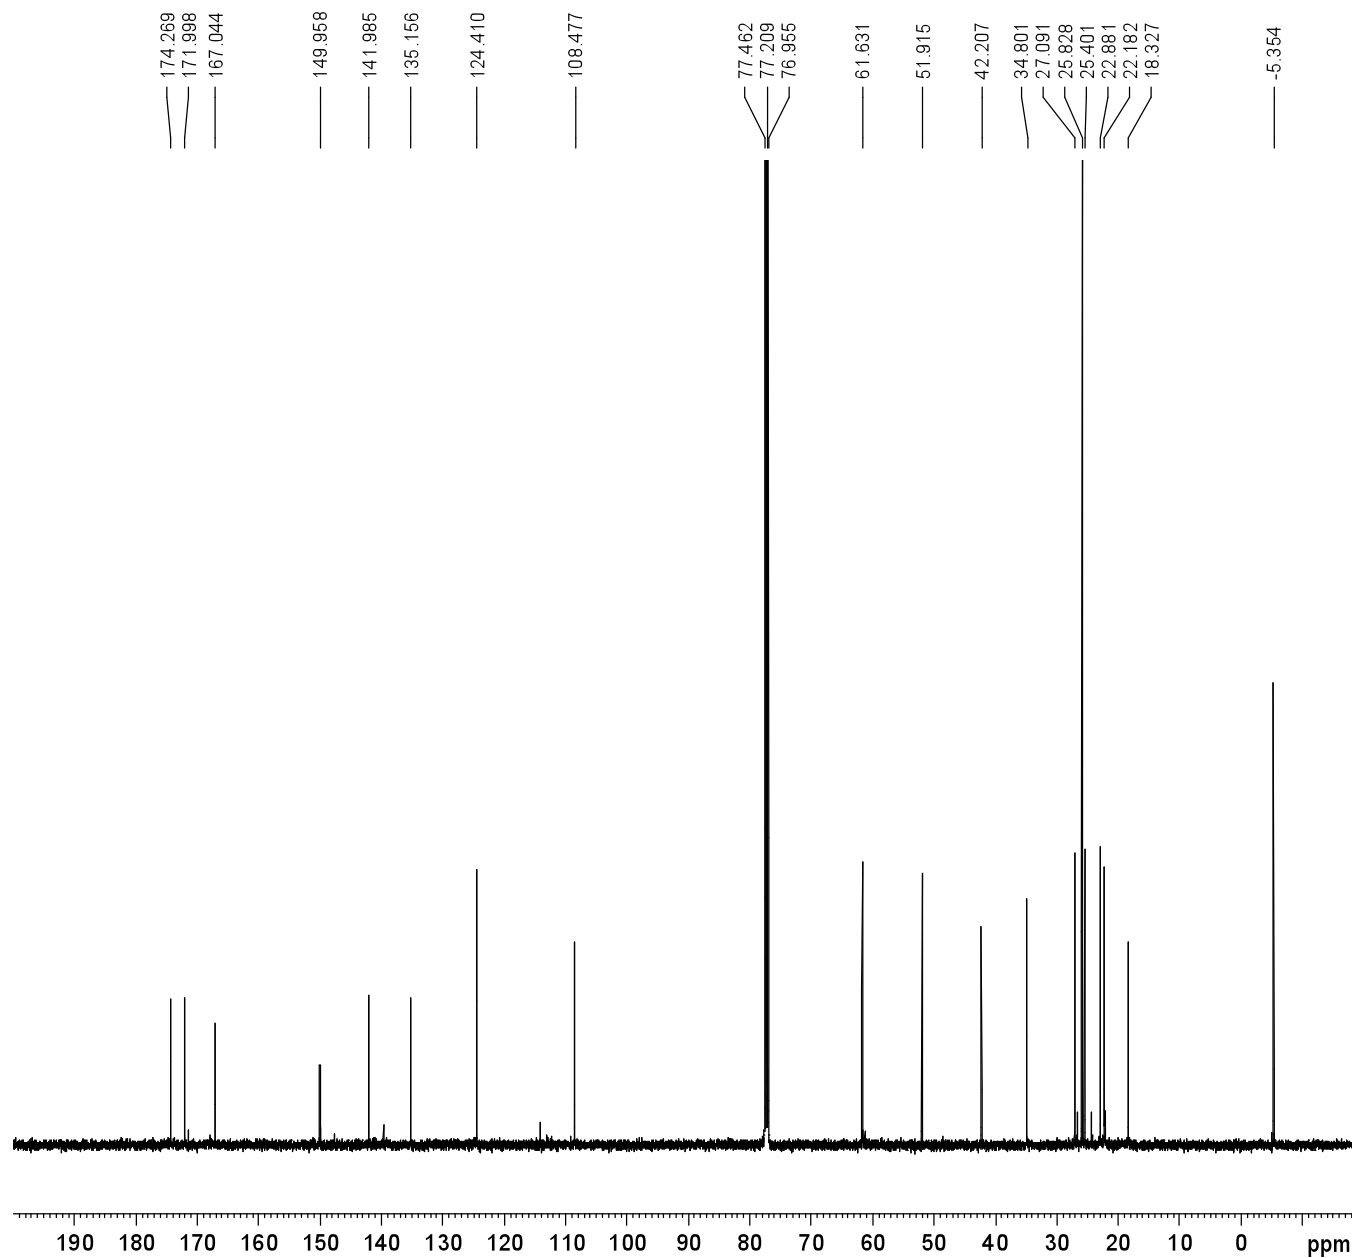

```

Current Data Parameters
NAME      U13Carbon
EXPNO    1
PROCNO   1

F2 - Acquisition Parameters
Date_    20090115
Time     14.40
INSTRUM  spect
PROBHD   5 mm PABBO BB-
PULPROG  zgpg30
TD       65536
SOLVENT  CDCl3
NS       308
DS       4
SWH      25761.904 Hz
FIDRES   0.454131 Hz
AQ       1.1010548 sec
RG       1290
DW       16.800 usec
DE       6.50 usec
TE       298.8 K
D1       2.0000000 sec
d11      0.0300000 sec
DELTA    1.8555558 sec
TDO      1

===== CHANNEL f1 =====
NUC1      13C
P1       7.50 usec
PL1      1.00 dB
SFO1     125.8357479 MHz

===== CHANNEL f2 =====
CPDPRG2  waltz16
NUC2      1H
PCPD2     80.00 usec
PL12     17.43 dB
PL13     18.43 dB
PL2      0.00 dB
SFO2     500.13520016 MHz

F2 - Processing parameters
SI       32768
SF       125.8231500 MHz
WDW      EM
SSB      0
LB       1.00 Hz
GB       0
PC       1.40
    
```

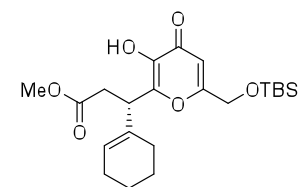

12

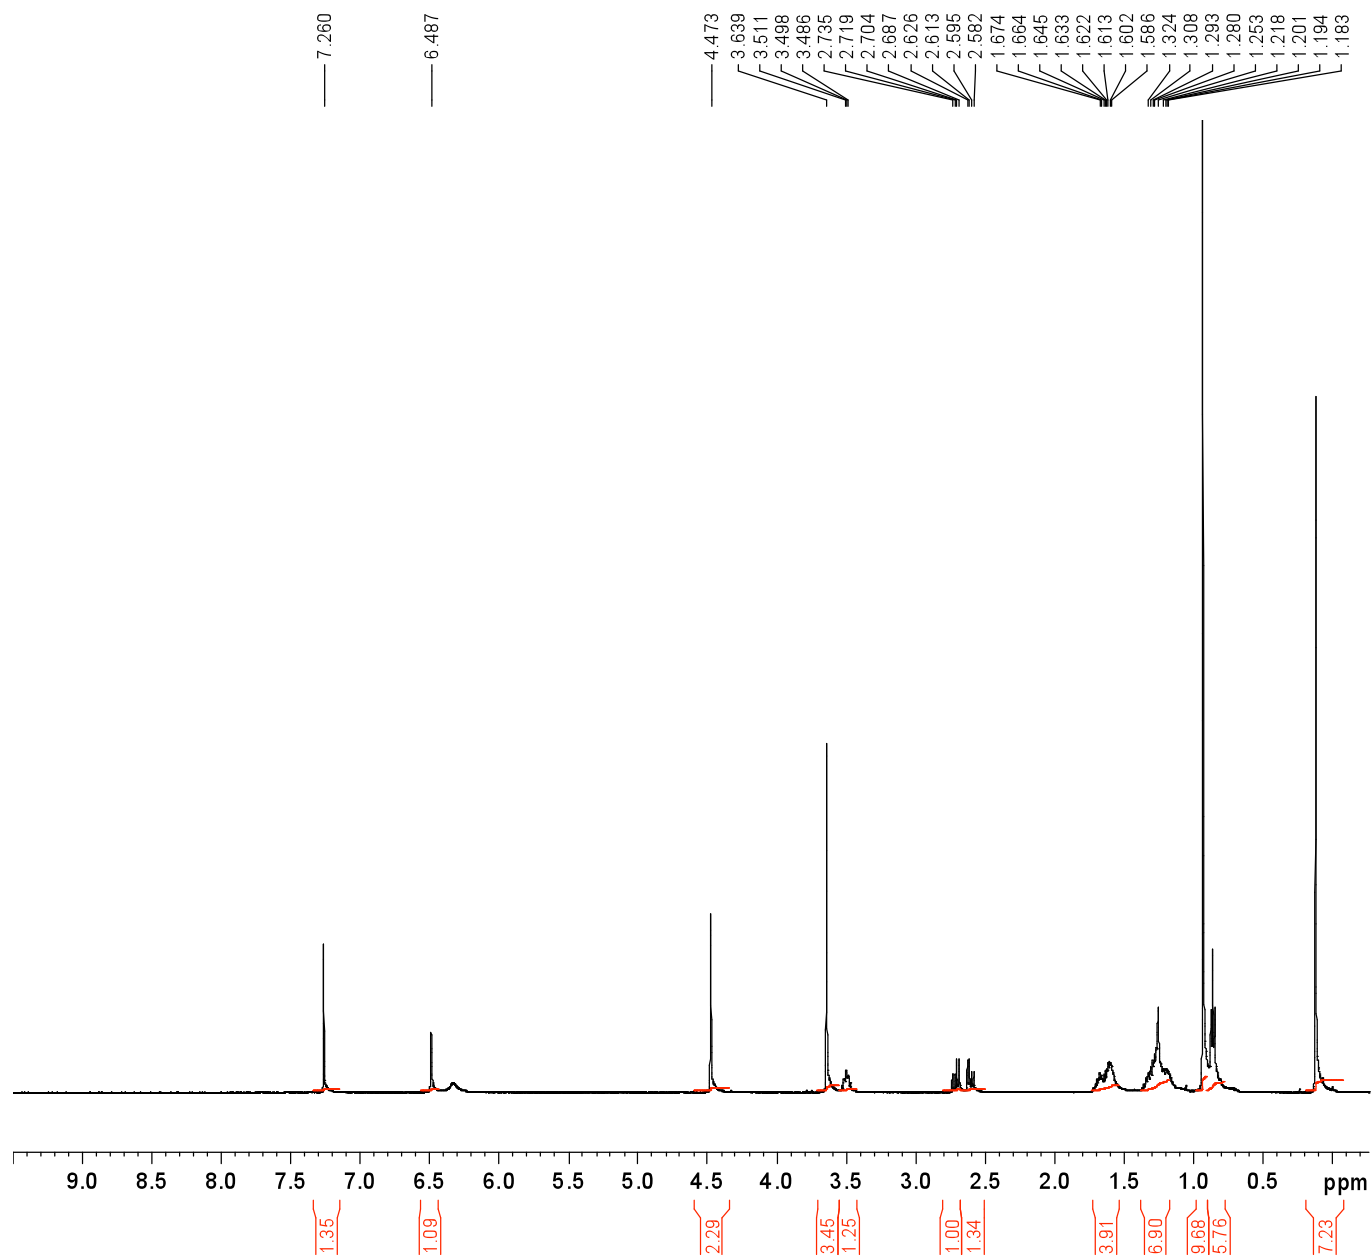

```

Current Data Parameters
NAME      1-JM-79ptlc
EXPNO    2
PROCNO   1

F2 - Acquisition Parameters
Date_    20090917
Time     21.14
INSTRUM  spect
PROBHD   5 mm PABBO BB-
PULPROG  zg30
TD       65536
SOLVENT  CDCl3
NS       16
DS       2
SWH      7002.801 Hz
FIDRES   0.106854 Hz
AQ       4.6793203 sec
RG       322
DW       71.400 usec
DE       6.50 usec
TE       300.0 K
D1       1.00000000 sec
TDO     1

===== CHANNEL f1 =====
NUC1     1H
P1       10.76 usec
PL1      0.00 dB
SFO1    500.3932525 MHz

F2 - Processing parameters
SI       32768
SF       500.3900160 MHz
WDW      EM
SSB      0
LB       0.30 Hz
GB       0
PC       1.00
    
```

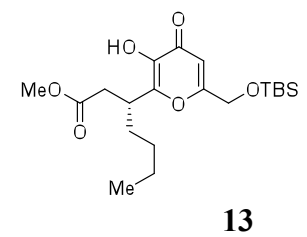

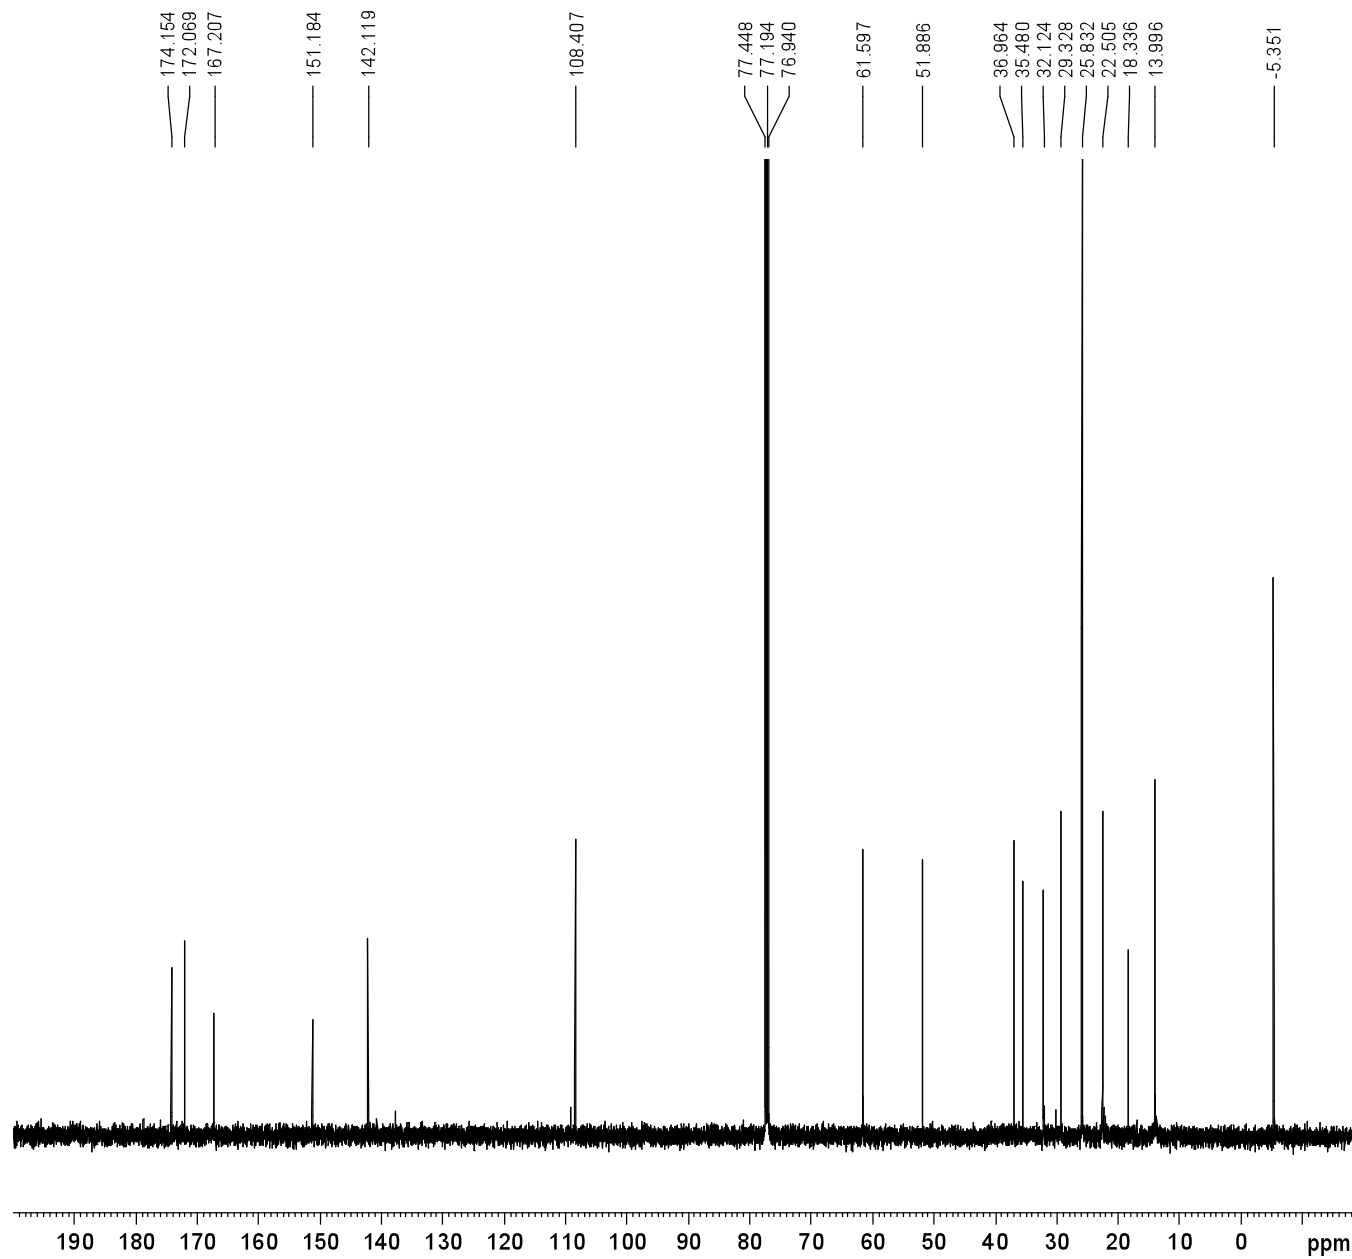

```

Current Data Parameters
NAME      UjessHBCarbon
EXPNO    2
PROCNO   1

F2 - Acquisition Parameters
Date_    2009024
Time     21.27
INSTRUM spect
PROBHD   5 mm PABBO BB-
PULPROG zgpg30
TD       65536
SOLVENT  CDCl3
NS       146
DS       4
SWH      25761.904 Hz
FIDRES   0.454131 Hz
AQ       1.1010548 sec
RG       456
DW       16.000 usec
DE       6.50 usec
TE       300.0 K
D1       2.0000000 sec
d11      0.0300000 sec
DELTA    1.0555556 sec
TDO      1

===== CHANNEL f1 =====
NUC1      13C
P1        7.50 usec
PL1       1.00 dB
SFO1      125.8357479 MHz

===== CHANNEL f2 =====
CPDPRG2  waltz16
NUC2      1H
PCPD2     80.00 usec
PL12      17.43 dB
PL13      18.43 dB
PL2       0.00 dB
SFO2      500.3520016 MHz

F2 - Processing parameters
SI        32768
SF        125.8231500 MHz
WDW       EM
SSB       0
LB        1.00 Hz
GB        0
PC        1.40
    
```

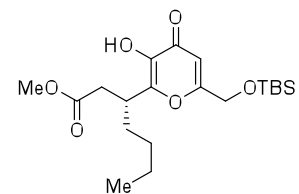

13

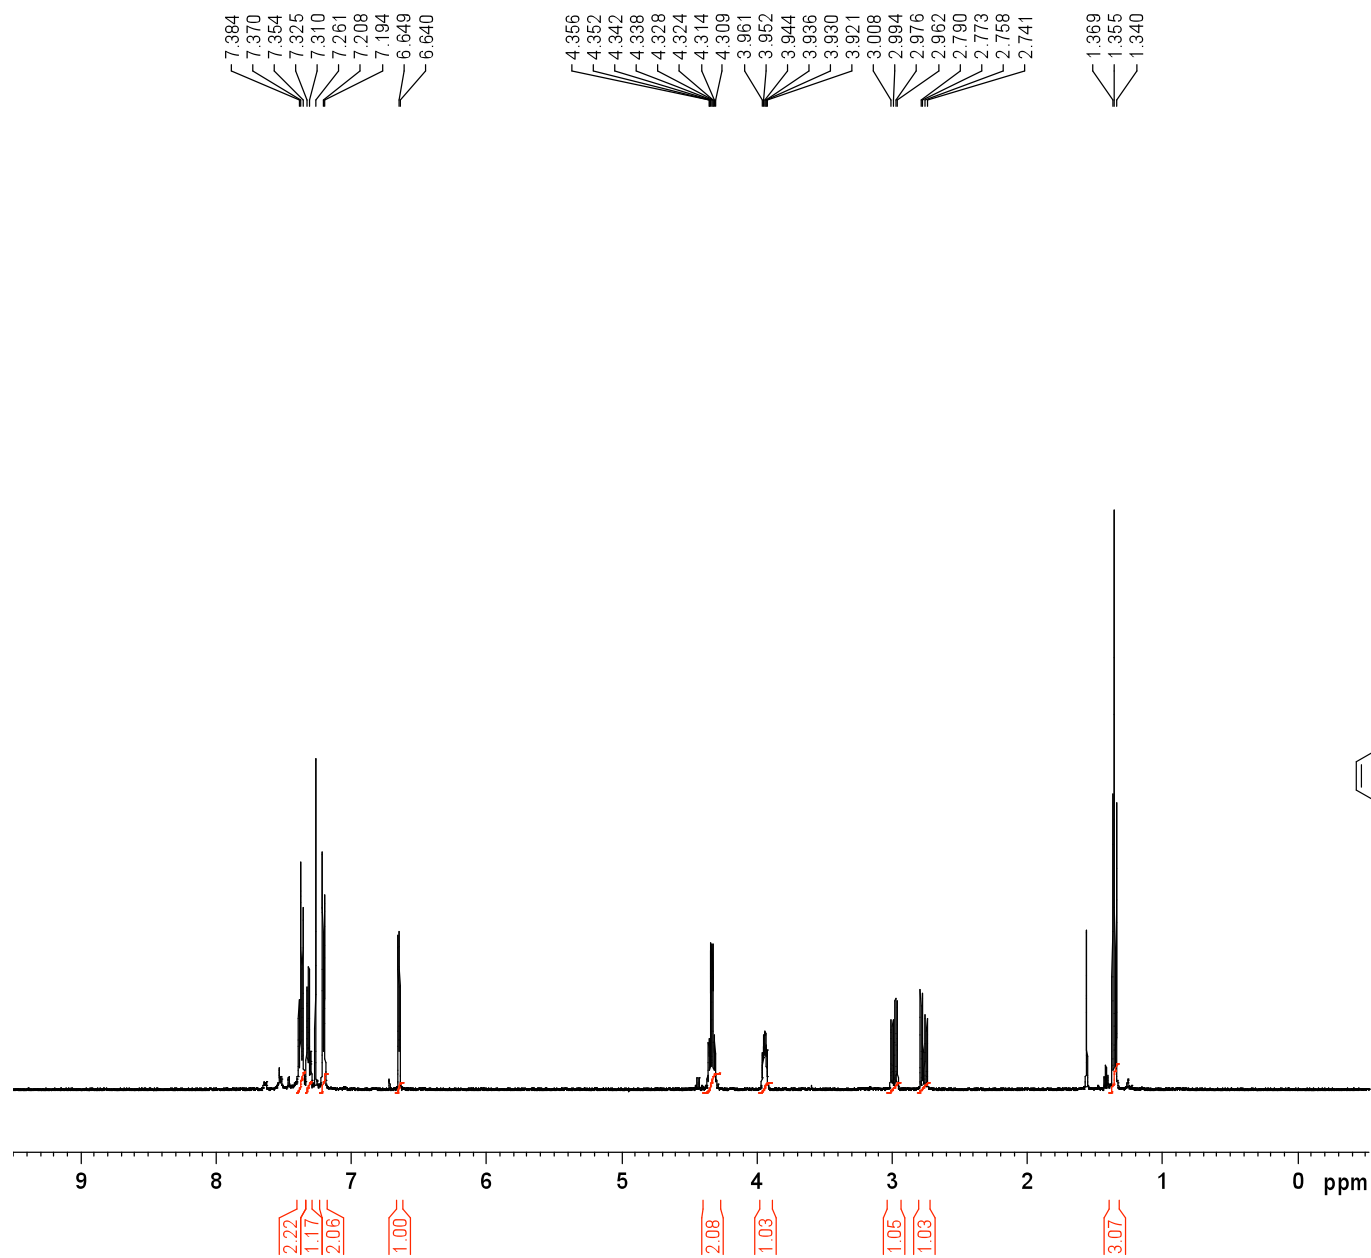

```

Current Data Parameters
NAME          V120
EXPNO        3
PROCNO       1

F2 - Acquisition Parameters
Date_        20090922
Time         11.31
INSTRUM      spect
PROBHD       5 mm PABBO BB-
PULPROG      zg30
TD           65536
SOLVENT      CDCl3
NS           11
DS           2
SWH          7002.801 Hz
FIDRES       0.106854 Hz
AQ           4.6793203 sec
RG           456
DW           71.400 usec
DE           6.50 usec
TE           298.2 K
D1           1.00000000 sec
TDO          1

===== CHANNEL f1 =====
NUC1         1H
P1           10.76 usec
PL1          0.00 dB
SFO1         500.3932525 MHz

F2 - Processing parameters
SI           32768
SF           500.3900160 MHz
WDW          EM
SSB          0
LB           0.30 Hz
GB           0
PC           1.00
    
```

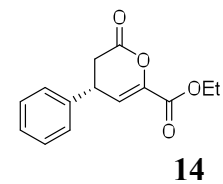



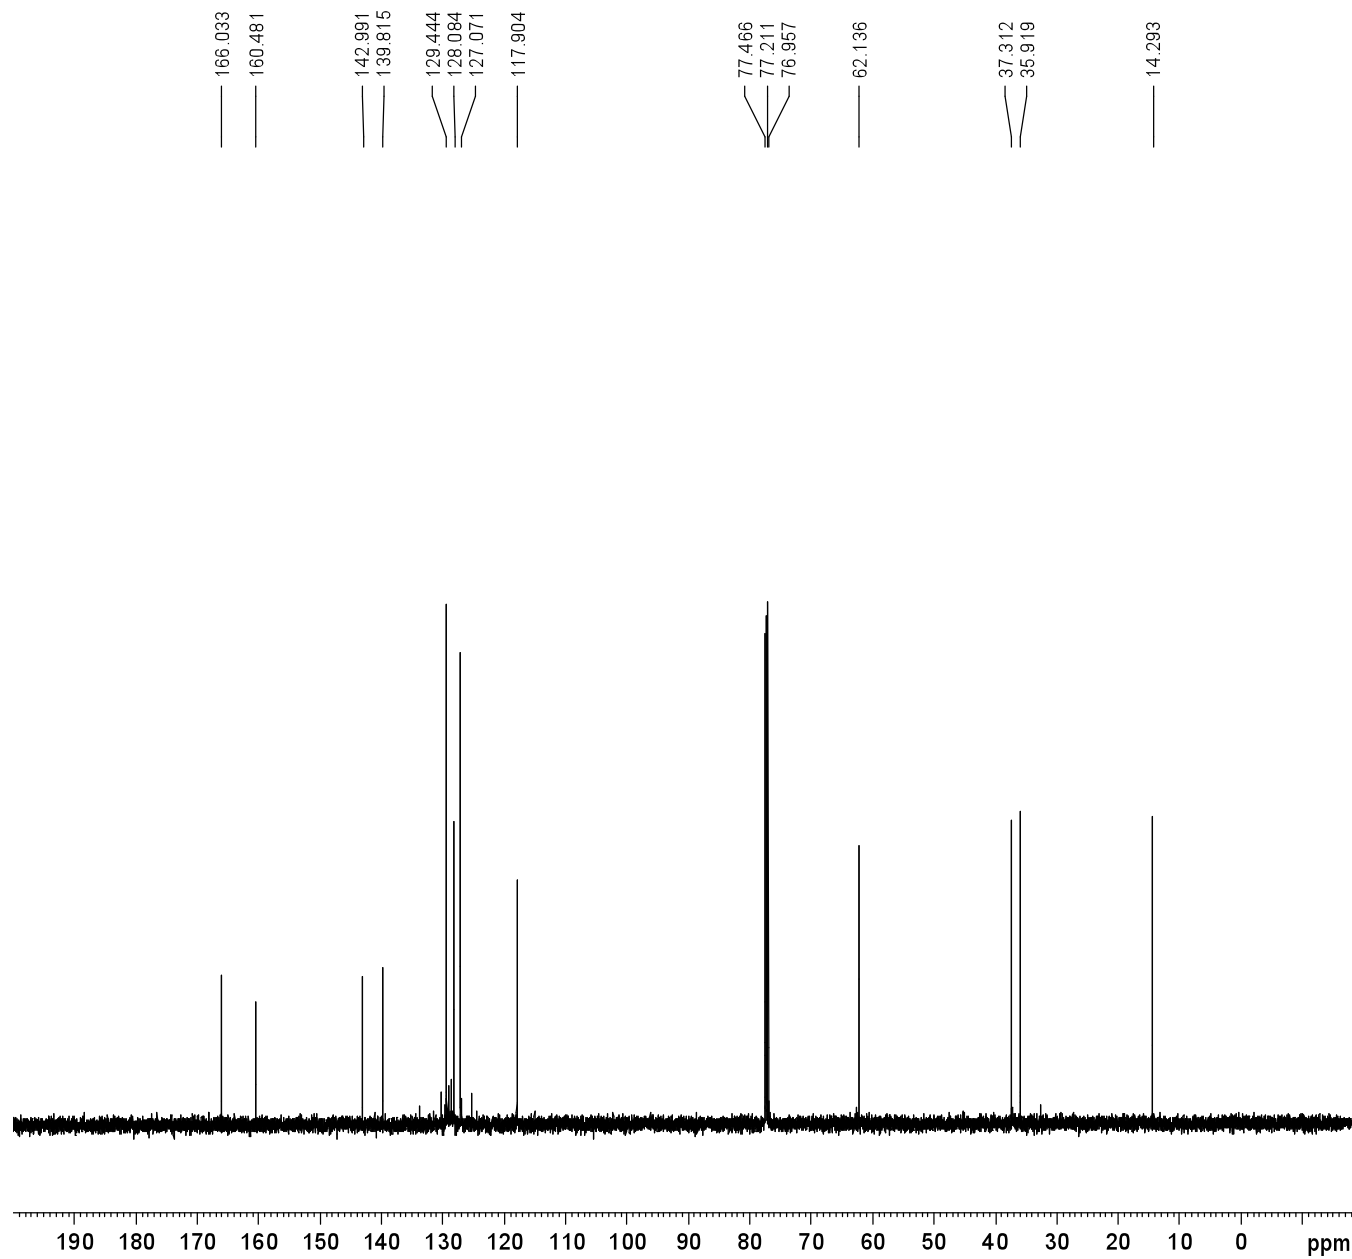

```

Current Data Parameters
NAME          U120carbon
EXPNO        1
PROCNO       1

F2 - Acquisition Parameters
Date_        20090227
Time         10.12
INSTRUM      spect
PROBHD       5 mm PABBO BB-
PULPROG      zgpg30
TD           65536
SOLVENT      CDCl3
NS           74
DS           4
SWH          25761.904 Hz
FIDRES       0.454131 Hz
AQ           1.1010548 sec
RG           456
DW           16.000 usec
DE           6.50 usec
TE           298.7 K
D1           2.0000000 sec
d11          0.0300000 sec
DELTA        1.0555558 sec
TDO          1

===== CHANNEL f1 =====
NUC1          13C
P1            7.50 usec
PL1           1.00 dB
SFO1         125.8357479 MHz

===== CHANNEL f2 =====
CPDPRG2      waltz16
NUC2          1H
PCPD2        80.00 usec
PL12         17.43 dB
PL13         18.43 dB
PL2          0.00 dB
SFO2         500.3520016 MHz

F2 - Processing parameters
SI            32768
SF            125.8231500 MHz
WDW           EM
SSB           0
LB            1.00 Hz
GB            0
PC            1.40
    
```

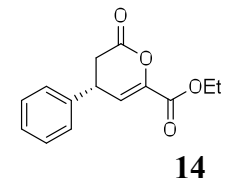

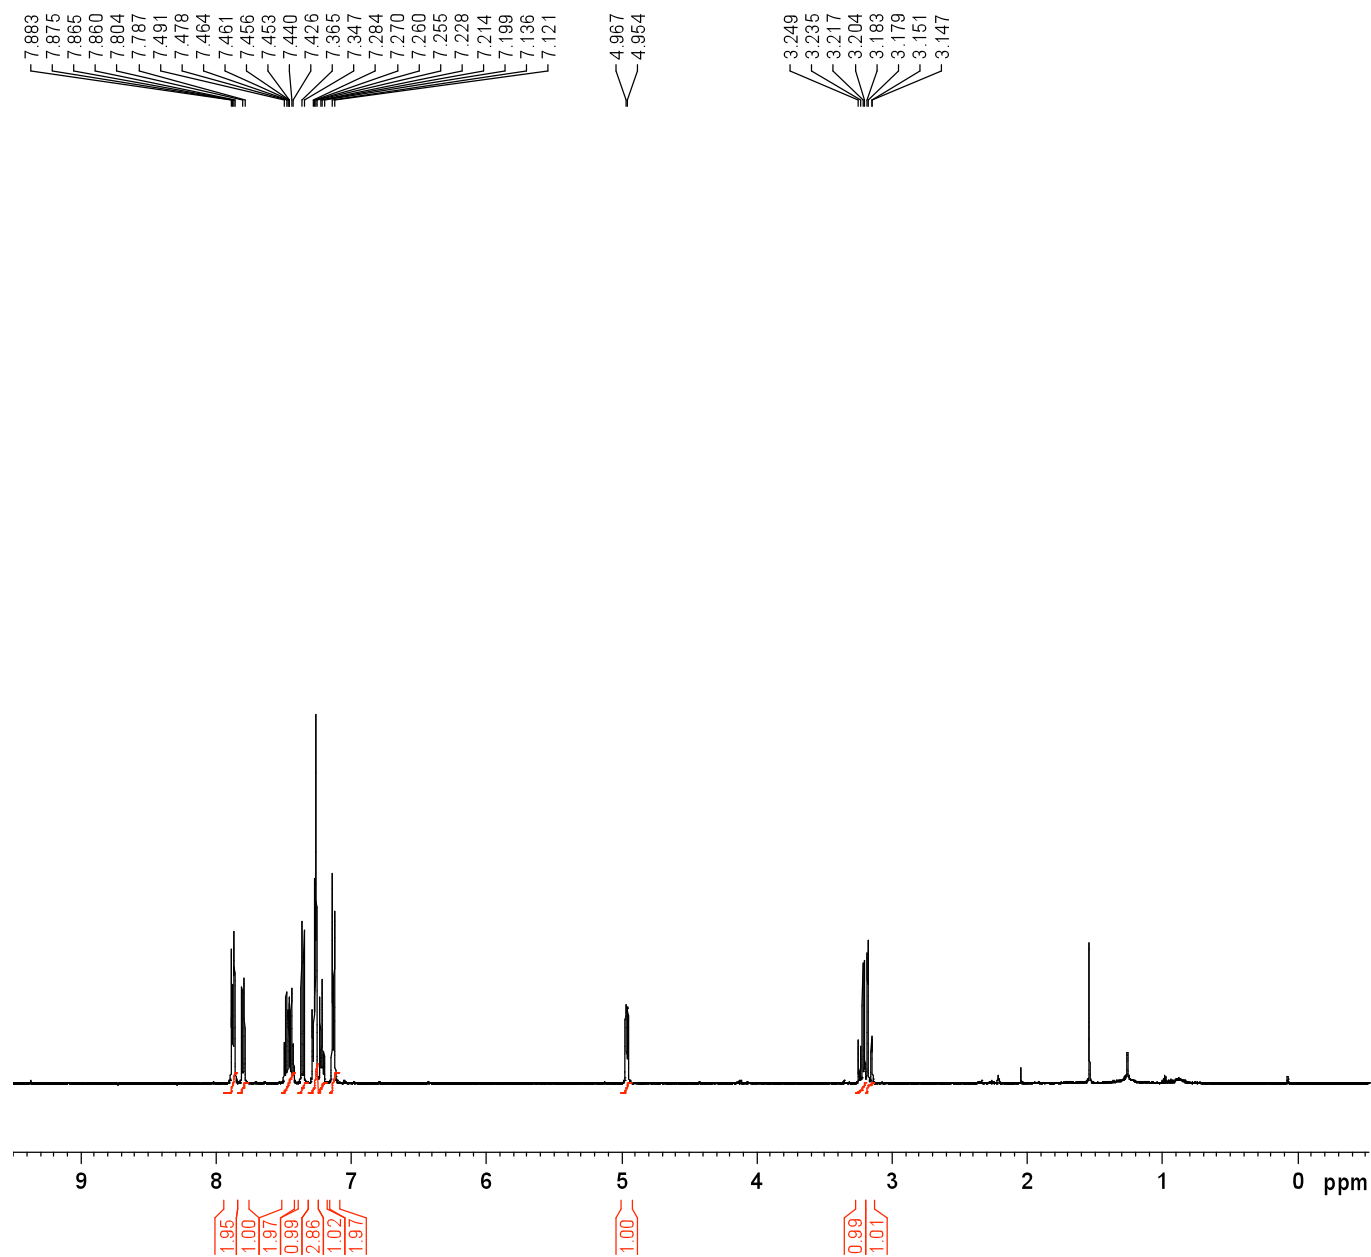

```

Current Data Parameters
NAME          IV225-3
EXPNO        2
PROCNO       1

F2 - Acquisition Parameters
Date_        20090304
Time         13.16
INSTRUM      spect
PROBHD       5 mm PABBO BB-
PULPROG      zg30
TD           65536
SOLVENT      CDCl3
NS           15
DS           2
SWH          7002.801 Hz
FIDRES       0.106854 Hz
AQ           4.6793203 sec
RG           724
DW           71.400 usec
DE           6.50 usec
TE           298.4 K
D1           1.00000000 sec
TDO          1

===== CHANNEL f1 =====
NUC1         1H
P1           10.76 usec
PL1          0.00 dB
SFO1         500.3932525 MHz

F2 - Processing parameters
SI           32768
SF           500.3900160 MHz
WDW          EM
SSB          0
LB           0.30 Hz
GB           0
PC           1.00
    
```

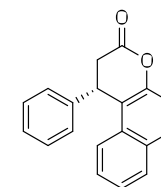

15

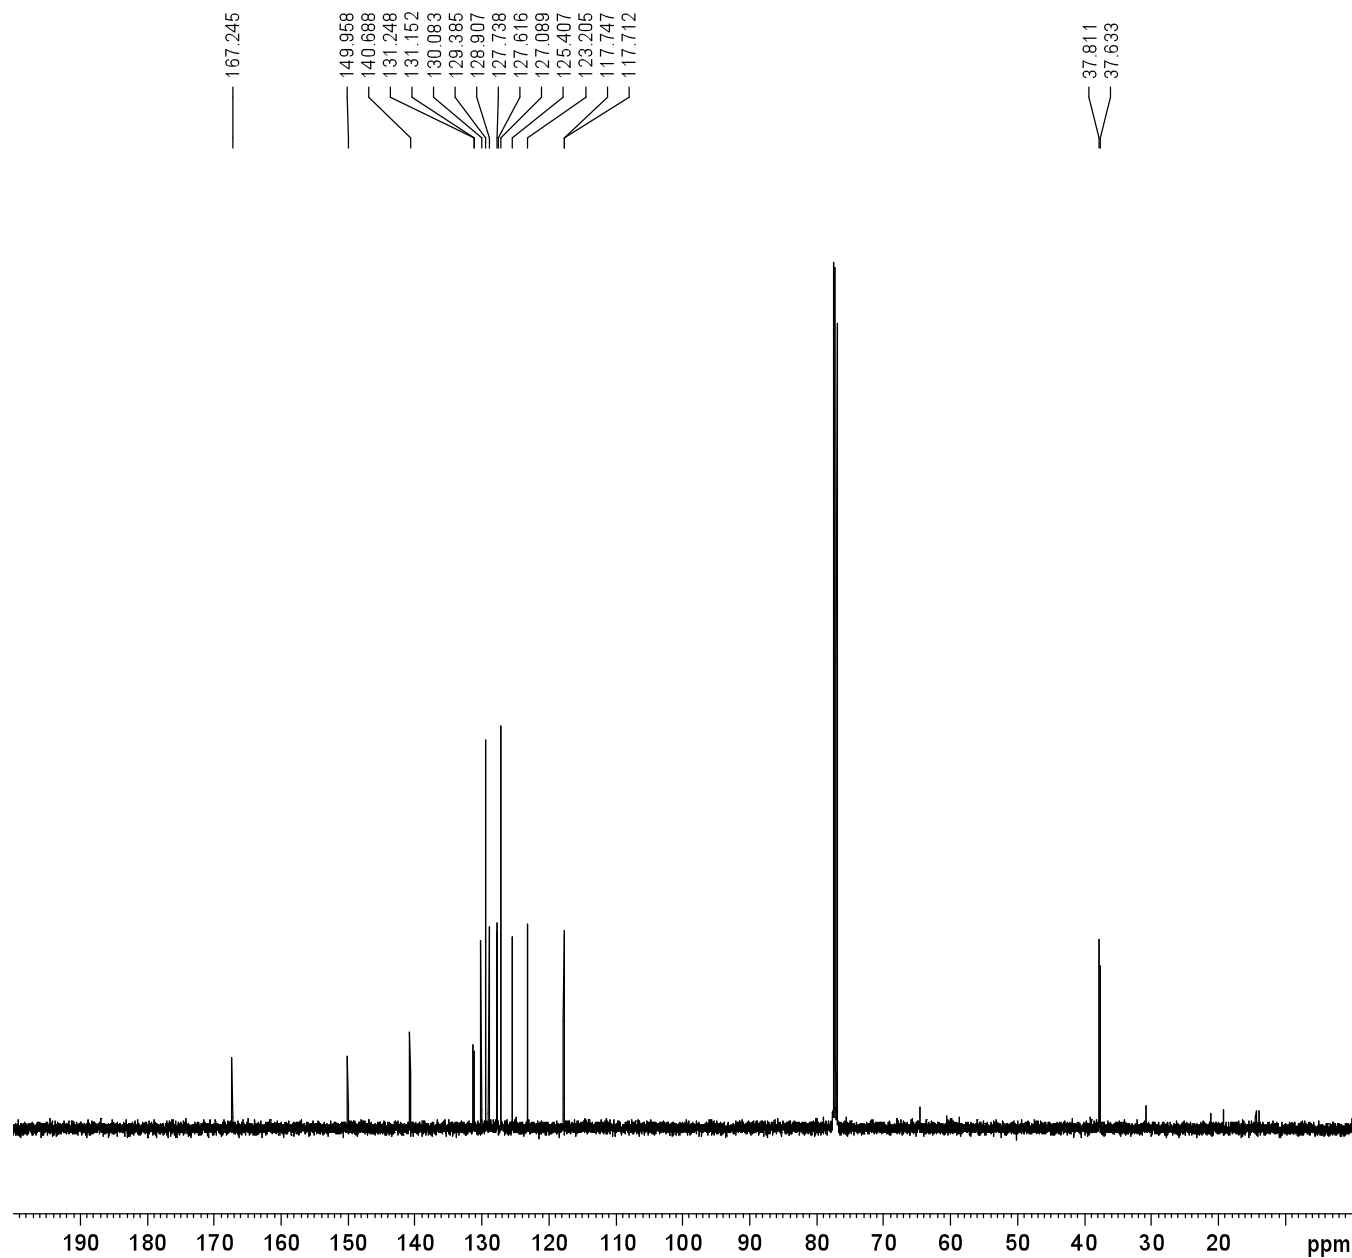

```

Current Data Parameters
NAME      IU185Carbon
EXPNO    1
PROCNO   1

F2 - Acquisition Parameters
Date_    20090206
Time     22.06
INSTRUM spect
PROBHD   5 mm PABBO BB-
PULPROG zgpg30
TD       65536
SOLVENT  CDCl3
NS       201
DS       4
SWH      25761.904 Hz
FIDRES   0.454131 Hz
AQ       1.1010548 sec
RG       456
DW       16.000 usec
DE       6.50 usec
TE       298.4 K
D1       2.0000000 sec
d11      0.0300000 sec
DELTA    1.0555555 sec
TDO      1

===== CHANNEL f1 =====
NUC1      13C
P1        7.50 usec
PL1       1.00 dB
SFO1      125.8357479 MHz

===== CHANNEL f2 =====
CPDPRG2  waltz16
NUC2      1H
PCPD2     80.00 usec
PL12      17.43 dB
PL13      18.43 dB
PL2       0.00 dB
SFO2      500.3520016 MHz

F2 - Processing parameters
SI        32768
SF        125.8231500 MHz
WDW       EM
SSB       0
LB        1.00 Hz
GB        0
PC        1.40
    
```

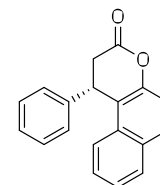

15

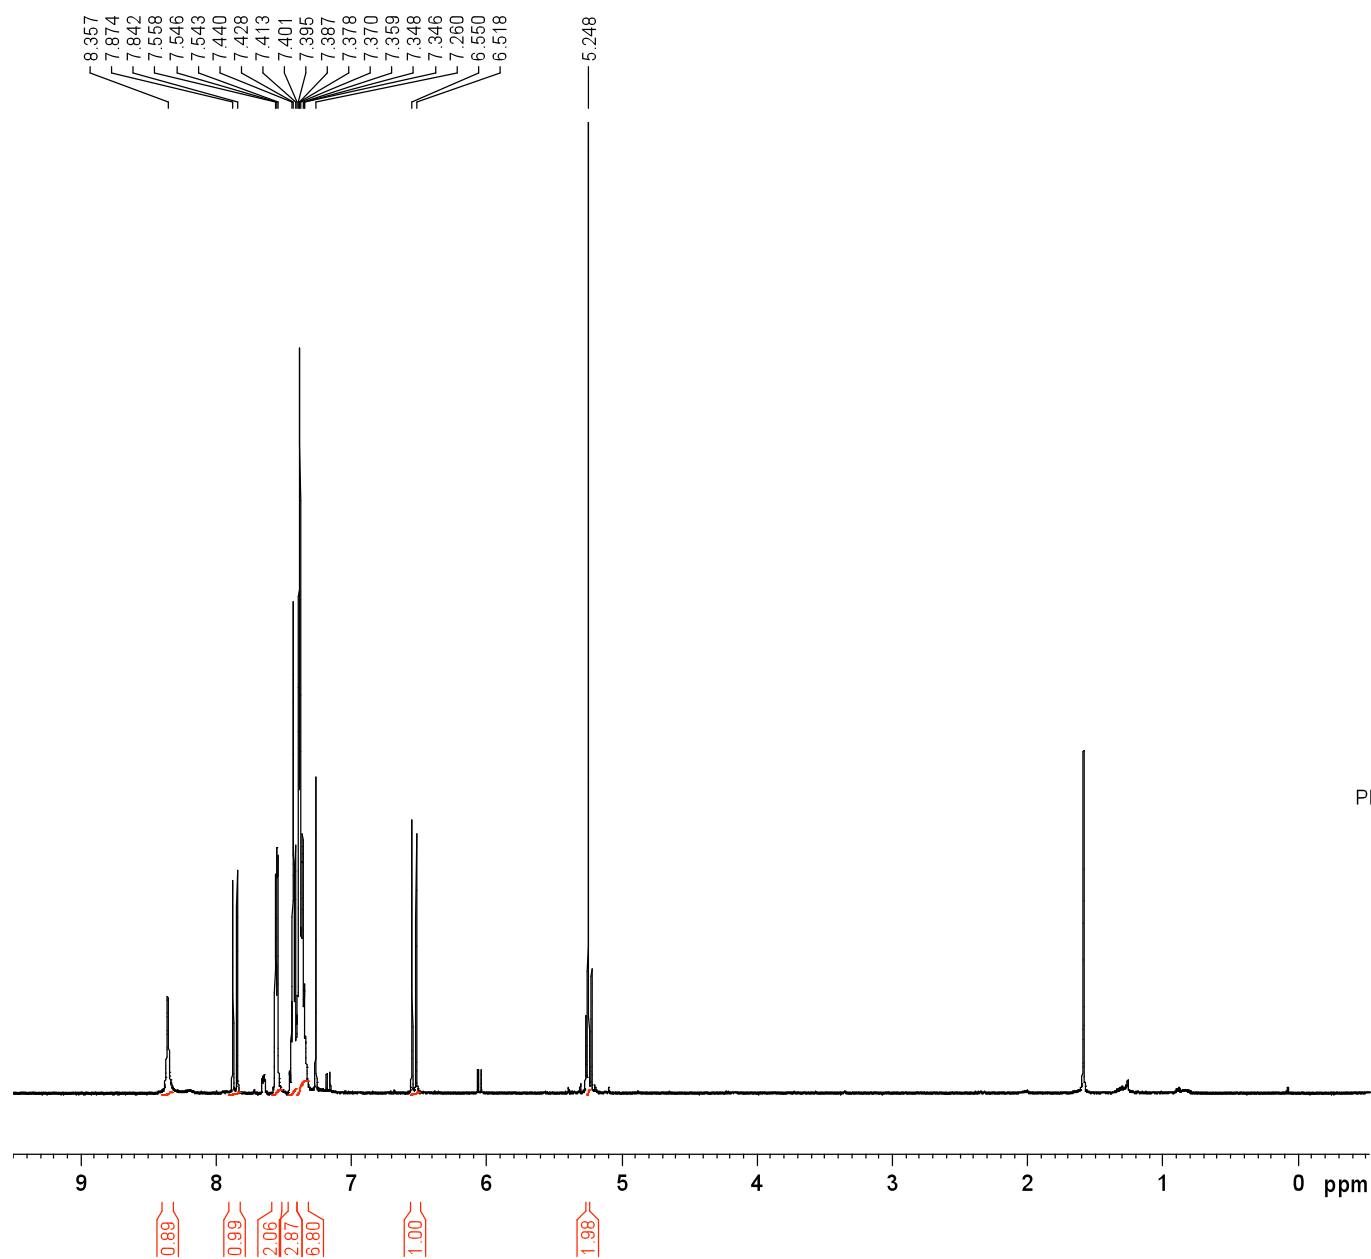

```

Current Data Parameters
NAME          V119
EXPNO         4
PROCNO        1

F2 - Acquisition Parameters
Date_         20091007
Time          20.06
INSTRUM       spect
PROBHD        5 mm PABBO BB-
PULPROG       zg30
TD            65536
SOLVENT       CDC13
NS            13
DS            2
SWH           7002.801 Hz
FIDRES        0.106854 Hz
AQ            4.6793203 sec
RG            362
DW            71.400 usec
DE            6.50 usec
TE            298.4 K
D1            1.00000000 sec
TDO           1

===== CHANNEL f1 =====
NUC1          1H
P1            10.76 usec
PL1           0.00 dB
SF01          500.3932525 MHz

F2 - Processing parameters
SI            32768
SF            500.3900160 MHz
WDW           EM
SSB           0
LB            0.30 Hz
GB            0
PC            1.00

```

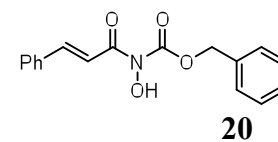

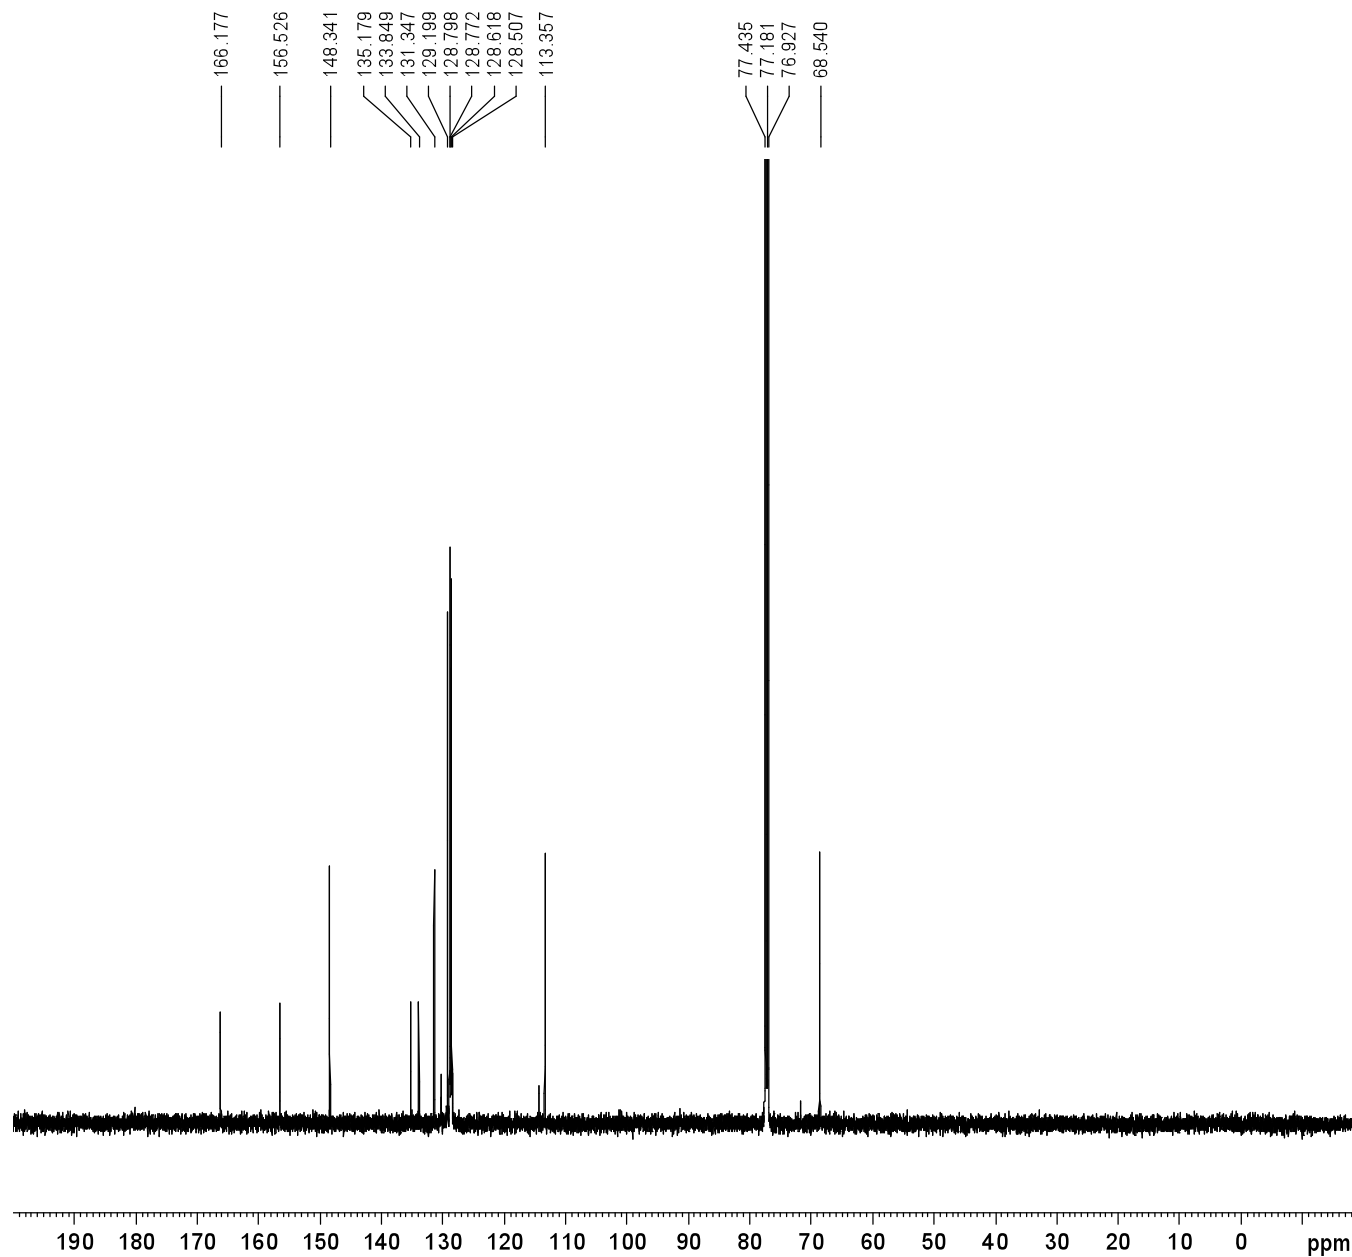

```

Current Data Parameters
NAME          U115carbon
EXPNO         4
PROCNO        1

F2 - Acquisition Parameters
Date_         20091007
Time          20.31
INSTRUM       spect
PROBHD        5 mm PABBO BB-
PULPROG       zgpg30
TD            65536
SOLVENT       CDCl3
NS            808
DS            4
SWH           25761.904 Hz
FIDRES        0.454131 Hz
AQ            1.1010548 sec
RG            456
DW            16.000 usec
DE            6.50 usec
TE            298.7 K
D1            2.00000000 sec
d11           0.03000000 sec
DELTA         1.0555555 sec
TDO           1

===== CHANNEL f1 =====
NUC1           13C
P1             7.50 usec
PL1            1.00 dB
SFO1           125.8357479 MHz

===== CHANNEL f2 =====
CPDPRG2       waltz16
NUC2           1H
PCPD2          80.00 usec
PL12           17.43 dB
PL13           18.43 dB
PL2            0.00 dB
SFO2           500.13520016 MHz

F2 - Processing parameters
SI            32768
SF            125.8231500 MHz
WDW           EM
SSB           0
LB            1.00 Hz
GB            0
PC            1.40
    
```

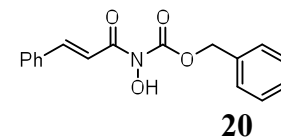

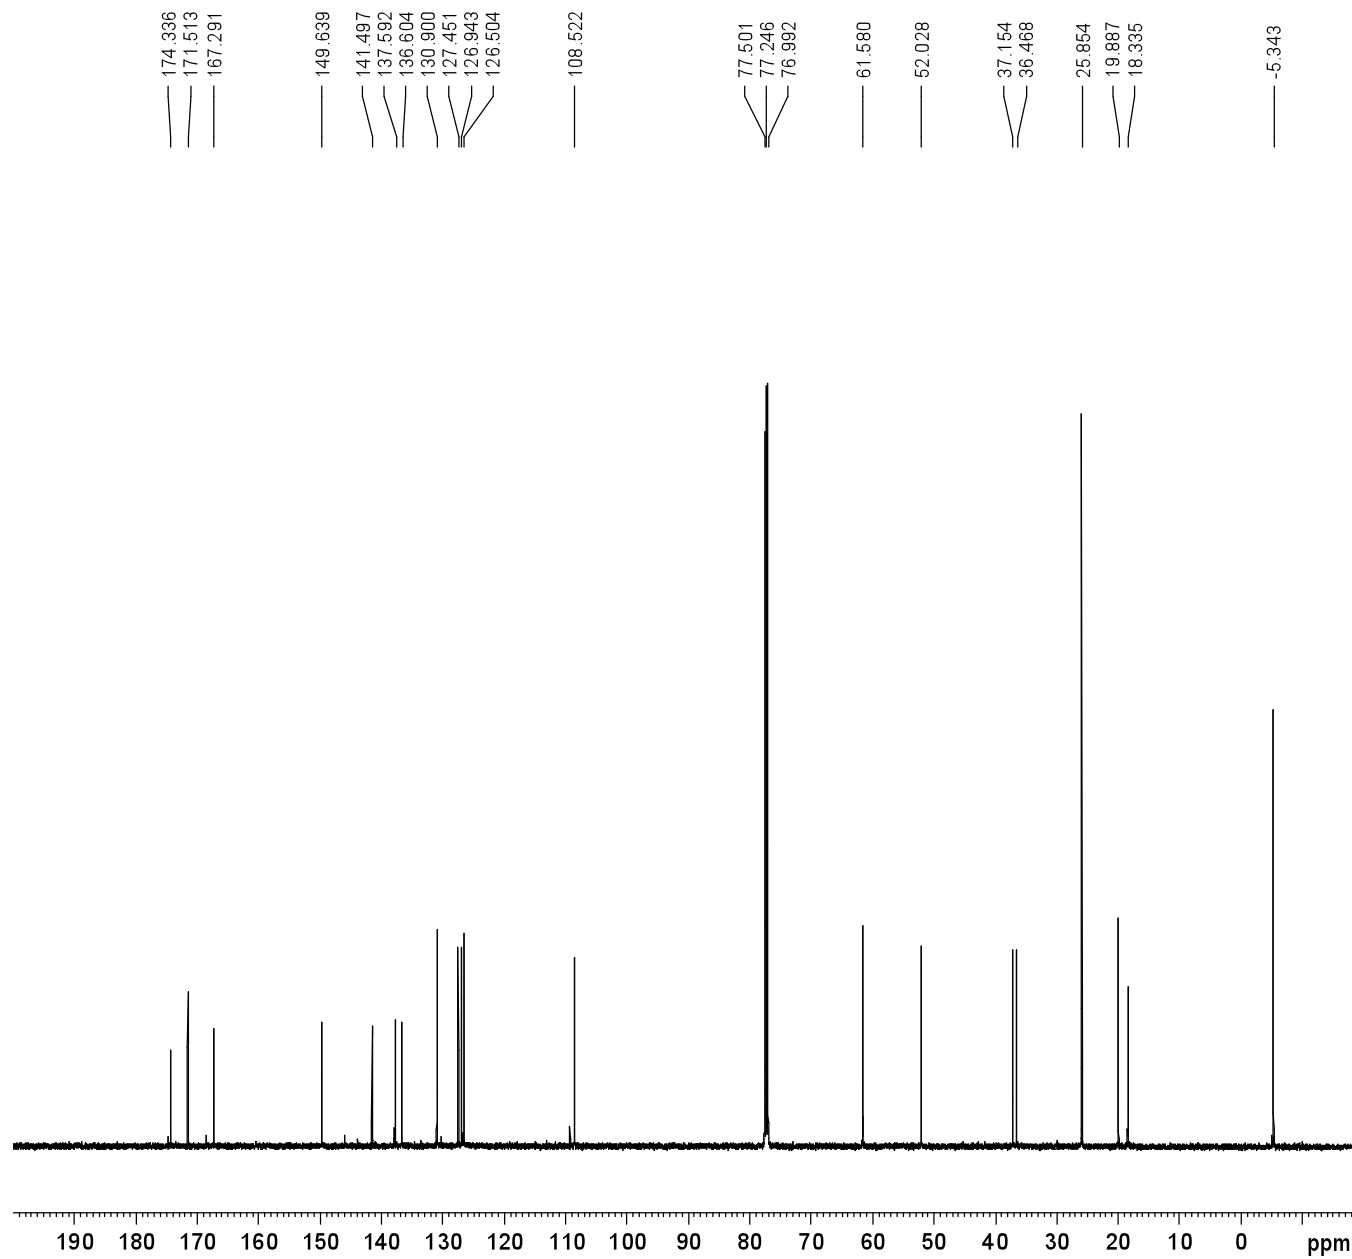

```

Current Data Parameters
NAME      V55carbon
EXPNO    1
PROCNO   1

F2 - Acquisition Parameters
Date_    2008024
Time     10.34
INSTRUM  spect
PROBHD   5 mm PABBO BB-
PULPROG  zgpg30
TD       65536
SOLVENT  CDCl3
NS       328
DS       4
SWH      25761.904 Hz
FIDRES   0.454131 Hz
AQ       1.1010548 sec
RG       1290
DW       16.000 usec
DE       6.50 usec
TE       298.5 K
D1       2.0000000 sec
d11      0.0300000 sec
DELTA    1.0555555 sec
TD0      1

===== CHANNEL f1 =====
NUC1      13C
P1       7.50 usec
PL1      1.00 dB
SFO1     125.8357479 MHz

===== CHANNEL f2 =====
CPDPRG2  waltz16
NUC2     1H
PCPD2    80.00 usec
PL12     17.43 dB
PL13     18.43 dB
PL2      0.00 dB
SFO2     500.13520016 MHz

F2 - Processing parameters
SI       32768
SF       125.8231500 MHz
WDW      EM
SSB      0
LB       1.00 Hz
GB       0
PC       1.40
    
```

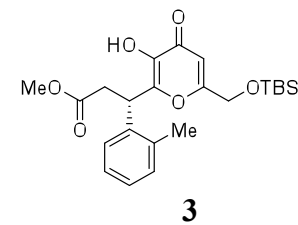

Supplement: NIHMS214545-supplement-1_si_001.pdf [file NIHMS214545-supplement-1_si_001.pdf]
